# Supplementary material for: Mechanistic insights into the palladium-catalyzed hydroaminocarbonylation of alkenes
Source: Royal Society of Chemistry journal article supplement (doi:10.1039/d1nj00589h), 2021-01-01
Supplement: d1nj00589h1.pdf [file d1nj00589h1.pdf]

## Supporting information for The mechanistic insights into the Palladium-catalyzed hydroaminocarbonylation of alkenes

### I. Computational Details

The calculations were conducted using Gaussian 09 program <sup>1</sup>. Geometries were optimized using the B3LYP functional <sup>2</sup>. Lanl2dz <sup>3</sup> basis set was used for Pd, a standard 6-31G(d) <sup>4</sup> basis set was used for other atoms. Frequency analyses were carried out to ensure these stationary points were at either a minimum or transition state. Solvation free energies are calculated with SMD<sup>5</sup> solvation model (solvent=methanol). The energetic results were further improved by single-point energy calculations at M06 <sup>6</sup> level of theory and the basis set SDD <sup>7</sup> for Pd and 6-311++G(d,p)<sup>8</sup> basis set for other atoms. The solvation model for the single point calculation was the same as described above. The energies presented in this paper are the M06-calculated single point energies added with B3LYP-optimized thermodynamic corrections.

### II. Free-energy profiles for other possible pathways

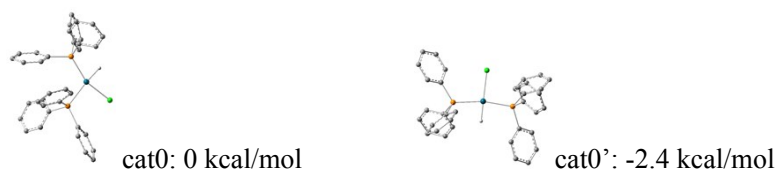

Figure S1. Free-energy for the cis-Pd(PPh<sub>3</sub>)<sub>2</sub>HCl and trans-Pd(PPh<sub>3</sub>)<sub>2</sub>HCl .

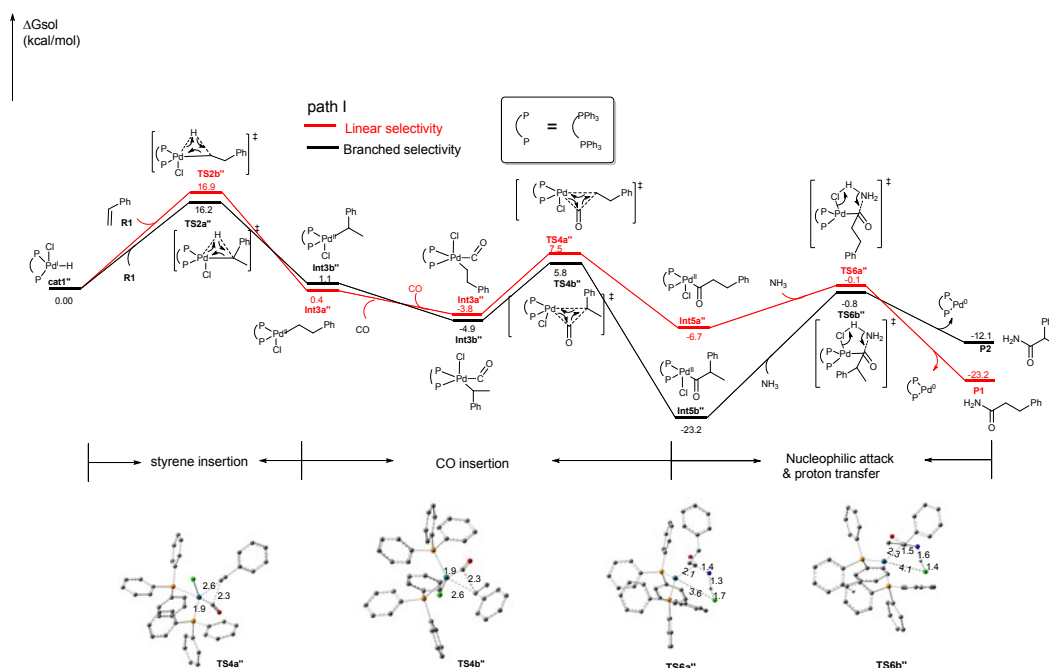

Figure S2. Free-energy profile for the path II' with Pd(II)/PPh<sub>3</sub> as the catalytic system. In the structure of the important intermediates and TSs, the hydrogen atom and the chloride anion were omitted for clarity.

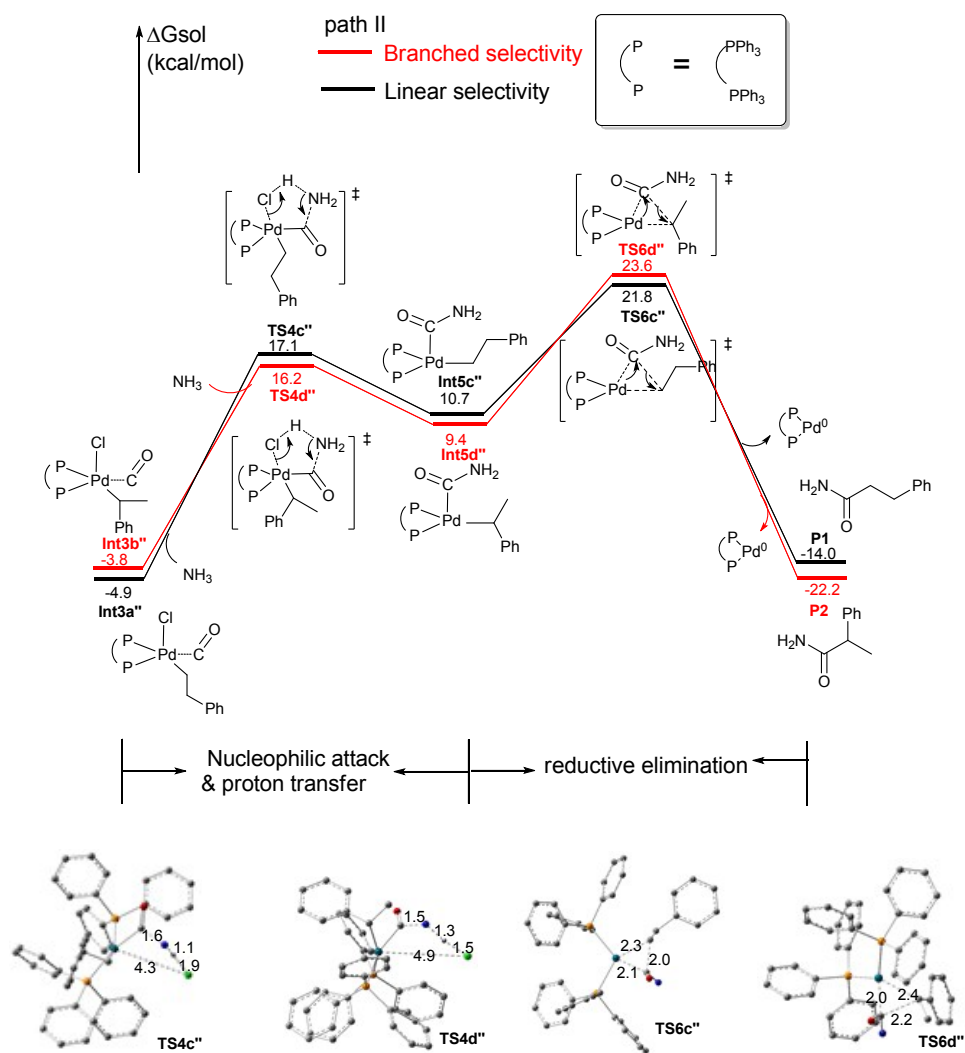

Figure S3. Free-energy profile for the path II' with Pd(II)/PPh<sub>3</sub> as the catalytic system. In the structure of the important intermediates and TSs, the hydrogen atom and the chloride anion were omitted for clarity.

### III. Cartesian coordinates and energies from the B3LYP method and electronic energies from M06

|                                   |          |         |          |   |          |          |          |
|-----------------------------------|----------|---------|----------|---|----------|----------|----------|
| <b>cat1</b>                       |          |         |          | H | -3.13783 | 4.30783  | 3.23417  |
| Number of imaginary frequencies=0 |          |         |          | C | -3.50966 | -0.24357 | -1.37638 |
| Charge = 0 Multiplicity = 1       |          |         |          | C | -4.36225 | -1.29177 | -0.99867 |
| C                                 | -3.78052 | 3.25555 | 1.46488  | C | -3.8565  | 0.5603   | -2.47773 |
| C                                 | -3.50374 | 2.22731 | 0.56224  | C | -5.5396  | -1.53506 | -1.7089  |
| C                                 | -2.36013 | 1.43242 | 0.72269  | H | -4.1097  | -1.92633 | -0.15569 |
| C                                 | -1.49284 | 1.69645 | 1.79571  | C | -5.04068 | 0.3167   | -3.17585 |
| C                                 | -1.77605 | 2.72202 | 2.69678  | H | -3.20557 | 1.38003  | -2.7747  |
| C                                 | -2.92071 | 3.50526 | 2.53422  | C | -5.88195 | -0.73192 | -2.79768 |
| H                                 | -4.66985 | 3.86395 | 1.32478  | H | -6.18733 | -2.35475 | -1.40895 |
| H                                 | -4.17821 | 2.05277 | -0.26802 | H | -5.30004 | 0.94811  | -4.02141 |

|                                                           |          |          |          |                                                           |          |          |          |
|-----------------------------------------------------------|----------|----------|----------|-----------------------------------------------------------|----------|----------|----------|
| H                                                         | -6.79854 | -0.92323 | -3.34959 | C                                                         | -0.32662 | -3.30733 | -3.79651 |
| C                                                         | -1.66015 | -1.39564 | 0.54602  | C                                                         | -2.98488 | -3.79427 | -4.50637 |
| C                                                         | -0.87837 | -2.43484 | 0.01558  | H                                                         | -3.35713 | -3.98967 | -2.39354 |
| C                                                         | -2.22773 | -1.55997 | 1.81974  | C                                                         | -0.70052 | -3.30461 | -5.13759 |
| C                                                         | -0.67141 | -3.61137 | 0.73772  | H                                                         | 0.71092  | -3.11041 | -3.5342  |
| H                                                         | -0.42085 | -2.31637 | -0.96302 | C                                                         | -2.02951 | -3.54803 | -5.49515 |
| C                                                         | -2.01367 | -2.73421 | 2.54457  | H                                                         | -4.01504 | -3.99717 | -4.78025 |
| H                                                         | -2.83163 | -0.7672  | 2.24944  | H                                                         | 0.0437   | -3.1172  | -5.90523 |
| C                                                         | -1.23636 | -3.76191 | 2.00621  | H                                                         | -2.31712 | -3.55162 | -6.54301 |
| H                                                         | -0.06405 | -4.40544 | 0.31176  | C                                                         | 1.10718  | 0.04753  | -0.54542 |
| H                                                         | -2.45709 | -2.84509 | 3.53065  | O                                                         | 1.71489  | 1.00264  | -0.43439 |
| H                                                         | -1.0712  | -4.67472 | 2.5724   | Thermal correction to Energy= 0.460172                    |          |          |          |
| P                                                         | -1.92726 | 0.11201  | -0.48688 | Thermal correction to Enthalpy=0.461116                   |          |          |          |
| Pd                                                        | -0.16956 | 0.63129  | -2.18273 | Thermal correction to Gibbs Free Energy=0.366641          |          |          |          |
| Cl                                                        | -1.19048 | 2.98847  | -2.41801 | Sum of electronic and zero-point Energies=-1586.043499    |          |          |          |
| H                                                         | -0.59842 | 1.10003  | 1.93742  | Sum of electronic and thermal Energies= -1586.014386      |          |          |          |
| H                                                         | -1.09452 | 2.90936  | 3.52199  | Sum of electronic and thermal Enthalpies= -1586.013442    |          |          |          |
| C                                                         | -0.82771 | -0.65142 | -3.54811 | Sum of electronic and thermal Free Energies= -1586.107917 |          |          |          |
| O                                                         | -1.08834 | -1.35302 | -4.41694 | SCF Done: E(RM06) = -1587.13571922                        |          |          |          |
| H                                                         | 0.81187  | 1.09002  | -3.3068  | Int3a                                                     |          |          |          |
| Thermal correction to Energy= 0.315328                    |          |          |          | Number of imaginary frequencies=0                         |          |          |          |
| Thermal correction to Enthalpy= 0.316272                  |          |          |          | Charge = 0 Multiplicity = 1                               |          |          |          |
| Thermal correction to Gibbs Free Energy= 0.236184         |          |          |          | P                                                         | 3.02862  | 0.01578  | -0.29479 |
| Sum of electronic and zero-point Energies= -1736.922993   |          |          |          | C                                                         | 3.60354  | -0.25645 | 1.43856  |
| Sum of electronic and thermal Energies= -1736.900268      |          |          |          | C                                                         | 2.64352  | -0.38304 | 2.46201  |
| Sum of electronic and thermal Enthalpies= -1736.899324    |          |          |          | C                                                         | 4.96269  | -0.36568 | 1.77358  |
| Sum of electronic and thermal Free Energies= -1736.979411 |          |          |          | C                                                         | 3.03685  | -0.61506 | 3.78047  |
| SCF Done: E(RM06) = -1624.685194                          |          |          |          | C                                                         | 5.35263  | -0.60363 | 3.09509  |
| TS2a                                                      |          |          |          | C                                                         | 4.39365  | -0.72282 | 4.10008  |
| Number of imaginary frequencies=1                         |          |          |          | C                                                         | 4.55984  | 0.17849  | -1.28369 |
| Charge = 0 Multiplicity = 1                               |          |          |          | C                                                         | 5.30347  | 1.36962  | -1.29806 |
| C                                                         | -2.00478 | 2.51661  | 2.63956  | C                                                         | 4.99285  | -0.91824 | -2.04755 |
| C                                                         | -2.30494 | 1.78548  | 1.48874  | C                                                         | 6.47511  | 1.45338  | -2.04964 |
| C                                                         | -1.75651 | 0.50781  | 1.3027   | C                                                         | 6.16746  | -0.83117 | -2.79511 |
| C                                                         | -0.8965  | -0.01699 | 2.28471  | C                                                         | 6.90644  | 0.35289  | -2.79968 |
| C                                                         | -0.60812 | 0.71288  | 3.43825  | C                                                         | 2.25646  | 1.68044  | -0.26854 |
| C                                                         | -1.16184 | 1.98265  | 3.6159   | C                                                         | 2.47131  | 2.59785  | 0.77257  |
| H                                                         | -2.43035 | 3.50722  | 2.7702   | C                                                         | 1.44173  | 2.04181  | -1.35762 |
| H                                                         | -2.95471 | 2.21928  | 0.7366   | C                                                         | 1.8813   | 3.85926  | 0.72277  |
| H                                                         | -0.93165 | 2.55603  | 4.50892  | C                                                         | 0.85959  | 3.3116   | -1.40039 |
| H                                                         | 1.12089  | -4.31193 | -1.58531 | C                                                         | 1.07536  | 4.22093  | -0.36235 |
| C                                                         | -1.27969 | -3.54712 | -2.78616 | H                                                         | 2.04584  | 4.56127  | 1.5347   |
| C                                                         | -2.61691 | -3.78688 | -3.16189 | H                                                         | 0.23586  | 3.58626  | -2.24658 |

|                                                           |          |          |          |                                   |          |          |          |
|-----------------------------------------------------------|----------|----------|----------|-----------------------------------|----------|----------|----------|
| H                                                         | 0.61925  | 5.20677  | -0.39717 | TS4a                              |          |          |          |
| H                                                         | 1.26846  | 1.33495  | -2.16508 | Number of imaginary frequencies=1 |          |          |          |
| H                                                         | 3.0864   | 2.32568  | 1.62432  | Charge = 0 Multiplicity = 1       |          |          |          |
| H                                                         | 7.04798  | 2.37447  | -2.06038 | P                                 | 3.03775  | 0.00819  | -0.25757 |
| H                                                         | 6.48853  | -1.67925 | -3.38999 | C                                 | 3.62777  | -0.23487 | 1.47039  |
| H                                                         | 7.8161   | 0.42137  | -3.38952 | C                                 | 2.67198  | -0.37363 | 2.49209  |
| H                                                         | 4.39518  | -1.82197 | -2.07618 | C                                 | 4.98834  | -0.32581 | 1.79681  |
| H                                                         | 4.97035  | 2.22838  | -0.72617 | C                                 | 3.07029  | -0.58281 | 3.81079  |
| H                                                         | 2.2831   | -0.71124 | 4.5562   | C                                 | 5.38377  | -0.54701 | 3.11875  |
| H                                                         | 6.40935  | -0.68426 | 3.33525  | C                                 | 4.42882  | -0.67303 | 4.12731  |
| H                                                         | 4.6993   | -0.90922 | 5.12704  | C                                 | 4.56079  | 0.17347  | -1.26917 |
| H                                                         | 5.71886  | -0.27081 | 1.00238  | C                                 | 5.29554  | 1.36954  | -1.30273 |
| H                                                         | 1.58561  | -0.29979 | 2.22941  | C                                 | 5.00632  | -0.9286  | -2.01314 |
| Pd                                                        | 1.55085  | -1.72569 | -1.03221 | C                                 | 6.46476  | 1.4534   | -2.05891 |
| C                                                         | 1.26286  | -2.66242 | 0.57358  | C                                 | 6.17864  | -0.84163 | -2.76497 |
| O                                                         | 1.03913  | -3.23672 | 1.55145  | C                                 | 6.9087   | 0.34779  | -2.78848 |
| C                                                         | -0.03505 | -3.6205  | -1.4021  | C                                 | 2.26587  | 1.67945  | -0.25627 |
| C                                                         | 0.4998   | -4.99432 | -0.99986 | C                                 | 2.48462  | 2.60493  | 0.77693  |
| H                                                         | 1.52115  | -5.13256 | -1.35715 | C                                 | 1.44956  | 2.03776  | -1.3428  |
| Cl                                                        | 1.51078  | -1.02359 | -3.35371 | C                                 | 1.89787  | 3.87081  | 0.72163  |
| H                                                         | 0.48354  | -5.20345 | 0.08091  | C                                 | 0.87085  | 3.30624  | -1.39154 |
| H                                                         | 0.12489  | -3.38194 | -2.4526  | C                                 | 1.09101  | 4.22349  | -0.36141 |
| H                                                         | -0.13211 | -5.76847 | -1.48809 | H                                 | 2.07186  | 4.57893  | 1.52751  |
| C                                                         | -1.35521 | -3.2011  | -0.88703 | H                                 | 0.24159  | 3.57371  | -2.23597 |
| C                                                         | -2.04437 | -3.83866 | 0.17214  | H                                 | 0.63299  | 5.20828  | -0.40067 |
| C                                                         | -2.01781 | -2.14545 | -1.55592 | H                                 | 1.27218  | 1.32455  | -2.14365 |
| C                                                         | -3.33916 | -3.45057 | 0.51698  | H                                 | 3.10542  | 2.34001  | 1.62684  |
| H                                                         | -1.57253 | -4.64954 | 0.72174  | H                                 | 7.02475  | 2.38435  | -2.08312 |
| C                                                         | -3.30414 | -1.77134 | -1.21445 | H                                 | 6.51081  | -1.69872 | -3.34389 |
| H                                                         | -1.49286 | -1.63889 | -2.36271 | H                                 | 7.81654  | 0.41749  | -3.38173 |
| C                                                         | -3.98633 | -2.42239 | -0.17889 | H                                 | 4.42146  | -1.84318 | -2.0224  |
| H                                                         | -3.85663 | -3.9664  | 1.31956  | H                                 | 4.95148  | 2.23647  | -0.74646 |
| H                                                         | -3.7957  | -0.96638 | -1.75973 | H                                 | 2.31954  | -0.68471 | 4.58951  |
| H                                                         | -4.99839 | -2.1339  | 0.08403  | H                                 | 6.44176  | -0.61846 | 3.35629  |
| Thermal correction to Energy= 0.463027                    |          |          |          | H                                 | 4.73867  | -0.84496 | 5.15448  |
| Thermal correction to Enthalpy= 0.463971                  |          |          |          | H                                 | 5.74158  | -0.22406 | 1.02284  |
| Thermal correction to Gibbs Free Energy= 0.365065         |          |          |          | H                                 | 1.6128   | -0.31605 | 2.25614  |
| Sum of electronic and zero-point Energies= -2046.461464   |          |          |          | Pd                                | 1.57945  | -1.70718 | -1.008   |
| Sum of electronic and thermal Energies= -2046.430742      |          |          |          | C                                 | 1.12863  | -2.78804 | 0.4536   |
| Sum of electronic and thermal Enthalpies= -2046.429797    |          |          |          | O                                 | 0.98486  | -3.29145 | 1.4872   |
| Sum of electronic and thermal Free Energies= -2046.528703 |          |          |          | C                                 | -0.04591 | -3.67599 | -1.27516 |
| SCF Done: E(RM06) = -2047.518759                          |          |          |          | C                                 | 0.43978  | -5.08524 | -1.00798 |
|                                                           |          |          |          | H                                 | 1.46768  | -5.21406 | -1.35984 |
|                                                           |          |          |          | Cl                                | 1.52511  | -1.02637 | -3.33415 |

|                                                           |          |          |          |                                                           |          |          |          |
|-----------------------------------------------------------|----------|----------|----------|-----------------------------------------------------------|----------|----------|----------|
| H                                                         | 0.40237  | -5.36949 | 0.04751  | H                                                         | 2.05654  | 4.55057  | 1.5347   |
| H                                                         | 0.19946  | -3.34786 | -2.28498 | H                                                         | 0.24656  | 3.57556  | -2.24658 |
| H                                                         | -0.19431 | -5.79135 | -1.56409 | H                                                         | 0.62995  | 5.19607  | -0.39717 |
| C                                                         | -1.40106 | -3.25691 | -0.86828 | H                                                         | 1.26846  | 1.32425  | -2.16508 |
| C                                                         | -2.108   | -3.89225 | 0.17006  | H                                                         | 3.0757   | 2.30428  | 1.62432  |
| C                                                         | -2.02716 | -2.19087 | -1.54841 | H                                                         | 7.01588  | 2.37447  | -2.03898 |
| C                                                         | -3.39616 | -3.48071 | 0.51062  | H                                                         | 6.48853  | -1.67925 | -3.38999 |
| H                                                         | -1.65214 | -4.71383 | 0.71396  | H                                                         | 7.8054   | 0.43207  | -3.37882 |
| C                                                         | -3.31195 | -1.78243 | -1.20499 | H                                                         | 4.39518  | -1.84337 | -2.07618 |
| H                                                         | -1.48699 | -1.6866  | -2.34651 | H                                                         | 4.93825  | 2.20698  | -0.71547 |
| C                                                         | -4.00364 | -2.42529 | -0.17262 | H                                                         | 2.2831   | -0.73264 | 4.5669   |
| H                                                         | -3.92726 | -3.98772 | 1.31208  | H                                                         | 6.40935  | -0.67356 | 3.34595  |
| H                                                         | -3.7777  | -0.96238 | -1.74508 | H                                                         | 4.6993   | -0.89852 | 5.13774  |
| H                                                         | -5.00752 | -2.1066  | 0.09481  | H                                                         | 5.71886  | -0.26011 | 1.01308  |
| Thermal correction to Energy= 0.462147                    |          |          |          | H                                                         | 1.58561  | -0.36399 | 2.22941  |
| Thermal correction to Enthalpy= 0.463092                  |          |          |          | Pd                                                        | 1.59365  | -1.65079 | -1.075   |
| Thermal correction to Gibbs Free Energy= 0.365711         |          |          |          | C                                                         | 0.98466  | -2.87642 | 0.25258  |
| Sum of electronic and zero-point Energies= -2046.444761   |          |          |          | O                                                         | 0.99633  | -3.23672 | 1.39095  |
| Sum of electronic and thermal Energies= -2046.414720      |          |          |          | C                                                         | 0.09335  | -3.5991  | -0.9634  |
| Sum of electronic and thermal Enthalpies= -2046.413776    |          |          |          | C                                                         | 0.4677   | -5.09062 | -0.89286 |
| Sum of electronic and thermal Free Energies= -2046.511156 |          |          |          | H                                                         | 1.51045  | -5.22886 | -1.20735 |
| SCF Done: E(RM06) = -2047.50546386                        |          |          |          | Cl                                                        | 1.52148  | -0.98079 | -3.41791 |
| Int5a                                                     |          |          |          | H                                                         | 0.36584  | -5.49235 | 0.12371  |
| Number of imaginary frequencies=0                         |          |          |          | H                                                         | 0.39239  | -3.23214 | -1.9604  |
| Charge = 0 Multiplicity = 1                               |          |          |          | H                                                         | -0.17491 | -5.67217 | -1.57369 |
| P                                                         | 3.01792  | -0.01632 | -0.26269 | C                                                         | -1.35521 | -3.2225  | -0.73723 |
| C                                                         | 3.60354  | -0.26715 | 1.45996  | C                                                         | -2.09787 | -3.84936 | 0.26844  |
| C                                                         | 2.64352  | -0.41514 | 2.47271  | C                                                         | -1.95361 | -2.19895 | -1.49172 |
| C                                                         | 4.96269  | -0.36568 | 1.78428  | C                                                         | -3.41406 | -3.46127 | 0.52768  |
| C                                                         | 3.03685  | -0.62576 | 3.79117  | H                                                         | -1.64743 | -4.63884 | 0.86084  |
| C                                                         | 5.35263  | -0.59293 | 3.10579  | C                                                         | -3.27204 | -1.80344 | -1.22515 |
| C                                                         | 4.39365  | -0.72282 | 4.11078  | H                                                         | -1.38586 | -1.70309 | -2.27711 |
| C                                                         | 4.53844  | 0.15709  | -1.28369 | C                                                         | -3.99703 | -2.43309 | -0.21099 |
| C                                                         | 5.28207  | 1.34822  | -1.28736 | H                                                         | -3.97433 | -3.9557  | 1.31956  |
| C                                                         | 4.98215  | -0.92894 | -2.04755 | H                                                         | -3.7208  | -1.00918 | -1.81323 |
| C                                                         | 6.45371  | 1.44268  | -2.03894 | H                                                         | -5.01979 | -2.1232  | -0.00157 |
| C                                                         | 6.15676  | -0.83117 | -2.79511 | Thermal correction to Energy= 0.464751                    |          |          |          |
| C                                                         | 6.89574  | 0.35289  | -2.78898 | Thermal correction to Enthalpy= 0.465695                  |          |          |          |
| C                                                         | 2.24576  | 1.65904  | -0.26854 | Thermal correction to Gibbs Free Energy= 0.368035         |          |          |          |
| C                                                         | 2.46061  | 2.57645  | 0.77257  | Sum of electronic and zero-point Energies= -2046.468021   |          |          |          |
| C                                                         | 1.44173  | 2.03111  | -1.35762 | Sum of electronic and thermal Energies= -2046.437904      |          |          |          |
| C                                                         | 1.8813   | 3.84856  | 0.72277  | Sum of electronic and thermal Enthalpies= -2046.436960    |          |          |          |
| C                                                         | 0.87029  | 3.3009   | -1.40039 | Sum of electronic and thermal Free Energies= -2046.534620 |          |          |          |
| C                                                         | 1.08606  | 4.21023  | -0.36235 | SCF Done: E(M06) = -2047.532411                           |          |          |          |

|                                   |          |          |          |                                   |          |          |          |                                                           |
|-----------------------------------|----------|----------|----------|-----------------------------------|----------|----------|----------|-----------------------------------------------------------|
|                                   |          |          |          | H                                 | -0.98042 | -4.59589 | -1.30657 |                                                           |
| TS6a                              |          |          |          | O                                 | 1.37483  | -4.95169 | -1.2115  |                                                           |
| Number of imaginary frequencies=1 |          |          |          | C                                 | 1.46434  | -3.30616 | 0.59187  |                                                           |
| Charge = 0 Multiplicity = 1       |          |          |          | H                                 | 1.45619  | -2.27154 | 0.15856  |                                                           |
| P                                 | 2.94151  | 0.74298  | -0.48641 | C                                 | 0.60164  | -3.27815 | 1.85361  |                                                           |
| C                                 | 3.77414  | 0.1688   | 1.07188  | C                                 | 0.54324  | -4.38578 | 2.71475  |                                                           |
| C                                 | 2.97812  | 0.03189  | 2.22268  | C                                 | -0.17104 | -2.14627 | 2.1564   |                                                           |
| C                                 | 5.13358  | -0.16635 | 1.15526  | C                                 | -0.25992 | -4.35745 | 3.85575  |                                                           |
| C                                 | 3.52686  | -0.41338 | 3.42445  | H                                 | 1.13379  | -5.27255 | 2.49797  |                                                           |
| C                                 | 5.68167  | -0.62469 | 2.35743  | C                                 | -0.97676 | -2.12008 | 3.29819  |                                                           |
| C                                 | 4.88297  | -0.7474  | 3.49469  | H                                 | -0.12966 | -1.28368 | 1.4925   |                                                           |
| C                                 | 4.29747  | 0.62827  | -1.7478  | C                                 | -1.02194 | -3.22403 | 4.15106  |                                                           |
| C                                 | 5.31258  | 1.58861  | -1.88414 | H                                 | -0.29077 | -5.2216  | 4.51407  |                                                           |
| C                                 | 4.29726  | -0.47886 | -2.61086 | H                                 | -1.56486 | -1.23348 | 3.51945  |                                                           |
| C                                 | 6.30811  | 1.43684  | -2.85145 | H                                 | -1.64669 | -3.20335 | 5.03984  |                                                           |
| C                                 | 5.29687  | -0.63465 | -3.57237 | C                                 | 2.92458  | -3.71413 | 0.82202  |                                                           |
| C                                 | 6.30494  | 0.32367  | -3.69491 | H                                 | 3.00866  | -4.74918 | 1.16846  |                                                           |
| C                                 | 2.7988   | 2.56956  | -0.19978 | H                                 | 3.49099  | -3.62825 | -0.109   |                                                           |
| C                                 | 3.58277  | 3.2748   | 0.72671  | H                                 | 3.37548  | -3.05469 | 1.56747  |                                                           |
| C                                 | 1.85361  | 3.27658  | -0.9607  |                                   |          |          |          | Thermal correction to Energy= 0.500396                    |
| C                                 | 3.43072  | 4.6551   | 0.88025  |                                   |          |          |          | Thermal correction to Enthalpy= 0.501340                  |
| C                                 | 1.70921  | 4.65625  | -0.81334 |                                   |          |          |          | Thermal correction to Gibbs Free Energy= 0.398039         |
| C                                 | 2.49708  | 5.34924  | 0.10885  |                                   |          |          |          | Sum of electronic and zero-point Energies= -2102.974310   |
| H                                 | 4.04211  | 5.18639  | 1.60544  |                                   |          |          |          | Sum of electronic and thermal Energies= -2102.942513      |
| H                                 | 0.9732   | 5.18765  | -1.41107 |                                   |          |          |          | Sum of electronic and thermal Enthalpies= -2102.941569    |
| H                                 | 2.37844  | 6.42277  | 0.23105  |                                   |          |          |          | Sum of electronic and thermal Free Energies= -2103.044870 |
| H                                 | 1.2233   | 2.73186  | -1.65944 |                                   |          |          |          | SCF Done: E(RM06) = -2104.07234932                        |
| H                                 | 4.30881  | 2.74676  | 1.33799  |                                   |          |          |          |                                                           |
| H                                 | 7.08415  | 2.19197  | -2.94836 | TS2b                              |          |          |          |                                                           |
| H                                 | 5.28034  | -1.49776 | -4.23281 | Number of imaginary frequencies=1 |          |          |          |                                                           |
| H                                 | 7.07881  | 0.20934  | -4.44961 | Charge = 0 Multiplicity = 1       |          |          |          |                                                           |
| H                                 | 3.49289  | -1.20622 | -2.53138 | C                                 | -2.20173 | 3.4875   | -0.83507 |                                                           |
| H                                 | 5.32187  | 2.46351  | -1.24096 | C                                 | -2.50311 | 2.14152  | -1.05917 |                                                           |
| H                                 | 2.89413  | -0.50964 | 4.30298  | C                                 | -2.01217 | 1.15815  | -0.18889 |                                                           |
| H                                 | 6.73645  | -0.88436 | 2.40146  | C                                 | -1.22177 | 1.54164  | 0.90953  |                                                           |
| H                                 | 5.3108   | -1.10337 | 4.42829  | C                                 | -0.92863 | 2.88569  | 1.12979  |                                                           |
| H                                 | 5.76982  | -0.07359 | 0.28105  | C                                 | -1.41504 | 3.86137  | 0.25425  |                                                           |
| H                                 | 1.91869  | 0.26855  | 2.16851  | H                                 | -2.58939 | 4.24219  | -1.51305 |                                                           |
| Pd                                | 1.03556  | -0.26919 | -1.08976 | H                                 | -3.12514 | 1.86754  | -1.90425 |                                                           |
| C                                 | 0.83039  | -4.15286 | -0.48804 | H                                 | -1.18401 | 4.90856  | 0.42534  |                                                           |
| H                                 | -0.74355 | -2.7748  | -1.29707 | C                                 | -3.59965 | -0.75966 | -1.7618  |                                                           |
| Cl                                | -1.0772  | -1.24061 | -1.98096 | C                                 | -4.93279 | -1.10493 | -1.49891 |                                                           |
| N                                 | -0.56669 | -3.87385 | -0.71225 | C                                 | -3.19885 | -0.52797 | -3.09103 |                                                           |
| H                                 | -1.09183 | -3.76489 | 0.16082  | C                                 | -5.85021 | -1.20753 | -2.54801 |                                                           |

|                                          |          |          |          |                                              |                           |
|------------------------------------------|----------|----------|----------|----------------------------------------------|---------------------------|
| H                                        | -5.25989 | -1.29521 | -0.48224 | Sum of electronic and zero-point Energies=   | -1586.005298              |
| C                                        | -4.1214  | -0.62046 | -4.13241 | Sum of electronic and thermal Energies=      | -1585.976934              |
| H                                        | -2.16671 | -0.26357 | -3.31196 | Sum of electronic and thermal Enthalpies=    | -1585.975990              |
| C                                        | -5.44945 | -0.96376 | -3.86169 | Sum of electronic and thermal Free Energies= | -1586.069612              |
| H                                        | -6.87994 | -1.4777  | -2.33333 | SCF Done: E(M06) =                           | -1587.09493               |
| H                                        | -3.8046  | -0.42798 | -5.15335 |                                              |                           |
| H                                        | -6.1664  | -1.04282 | -4.67345 | Int3b                                        |                           |
| C                                        | -3.11301 | -1.18631 | 1.12864  | Number of imaginary frequencies=             | 0                         |
| C                                        | -2.7741  | -2.4299  | 1.68333  | Charge = 0                                   | Multiplicity = 1          |
| C                                        | -4.04963 | -0.37053 | 1.78899  | C                                            | 1.49672 1.52867 -3.00762  |
| C                                        | -3.36902 | -2.85957 | 2.87066  | C                                            | 1.07331 2.8242 -3.2766    |
| H                                        | -2.03484 | -3.05848 | 1.19495  | C                                            | 2.25974 1.26761 -1.85371  |
| C                                        | -4.64412 | -0.80565 | 2.97274  | C                                            | 1.39096 3.87206 -2.40183  |
| H                                        | -4.30767 | 0.60371  | 1.38444  | C                                            | 2.57703 2.31136 -0.97725  |
| C                                        | -4.30582 | -2.04926 | 3.51385  | C                                            | 2.13957 3.61048 -1.25317  |
| H                                        | -3.09592 | -3.8214  | 3.29442  | H                                            | 1.0475 4.87722 -2.61282   |
| H                                        | -5.36691 | -0.17044 | 3.47617  | H                                            | 3.15493 2.12558 -0.07887  |
| H                                        | -4.7668  | -2.38144 | 4.43934  | H                                            | 2.38243 4.41592 -0.56738  |
| P                                        | -2.33995 | -0.63394 | -0.43519 | P                                            | 2.8327 -0.45769 -1.57488  |
| Pd                                       | -0.34073 | -1.9199  | -0.97672 | C                                            | 3.38723 -0.47512 0.19062  |
| C                                        | -1.43271 | -3.53919 | -1.83685 | C                                            | 2.41955 -0.43395 1.20925  |
| H                                        | -2.06744 | -3.15774 | -2.6313  | C                                            | 4.7435 -0.53629 0.54914   |
| H                                        | -1.96372 | -4.03039 | -1.02506 | C                                            | 2.80156 -0.44749 2.55563  |
| C                                        | -0.11723 | -4.02924 | -2.15921 | H                                            | 1.36382 -0.38345 0.96093  |
| H                                        | 0.75759  | -3.02097 | -1.45346 | C                                            | 5.12239 -0.55379 1.89386  |
| H                                        | 0.24859  | -4.83242 | -1.51803 | H                                            | 5.50532 -0.56674 -0.22257 |
| H                                        | -0.85313 | 0.79434  | 1.6082   | C                                            | 4.1553 -0.51051 2.89808   |
| H                                        | -0.3239  | 3.17195  | 1.98524  | H                                            | 2.0418 -0.41903 3.32547   |
| C                                        | 0.46653  | -4.03046 | -3.52905 | H                                            | 6.17669 -0.60727 2.1528   |
| C                                        | 1.48338  | -4.95339 | -3.81587 | H                                            | 4.45265 -0.53186 3.94308  |
| C                                        | 0.02196  | -3.16435 | -4.5406  | C                                            | 4.3574 -0.664 -2.55701    |
| C                                        | 2.03741  | -5.02145 | -5.09393 | C                                            | 4.70222 -1.94399 -3.01026 |
| H                                        | 1.83654  | -5.6272  | -3.03877 | C                                            | 5.18707 0.42605 -2.86868  |
| C                                        | 0.57973  | -3.23046 | -5.81456 | C                                            | 5.86825 -2.14006 -3.74186 |
| H                                        | -0.75832 | -2.43646 | -4.33606 | H                                            | 4.03951 -2.78515 -2.80946 |
| C                                        | 1.58743  | -4.15926 | -6.09471 | C                                            | 6.35597 0.22649 -3.60595  |
| H                                        | 2.81838  | -5.74536 | -5.3054  | H                                            | 4.91734 1.42507 -2.53956  |
| H                                        | 0.22957  | -2.55802 | -6.59202 | C                                            | 6.69905 -1.05286 -4.03759 |
| H                                        | 2.01946  | -4.20778 | -7.08974 | H                                            | 6.12735 -3.13448 -4.09408 |
| C                                        | 1.06233  | -0.66772 | -0.30673 | H                                            | 6.98952 1.07688 -3.84303  |
| O                                        | 1.89469  | 0.01707  | 0.05424  | H                                            | 7.60667 -1.20636 -4.62291 |
| Thermal correction to Energy=            | 0.454833 |          |          | Cl                                           | 1.23961 -1.8173 -4.4216   |
| Thermal correction to Enthalpy=          | 0.455777 |          |          | H                                            | 1.24579 0.71991 -3.68301  |
| Thermal correction to Gibbs Free Energy= | 0.362155 |          |          | H                                            | 0.48258 3.02084 -4.17113  |

|                                              |              |          |          |                               |          |          |          |
|----------------------------------------------|--------------|----------|----------|-------------------------------|----------|----------|----------|
| Pd                                           | 1.13523      | -2.11064 | -2.02558 | C                             | 4.74678  | -0.53331 | 0.55256  |
| C                                            | 0.74247      | -2.751   | -0.30709 | C                             | 2.8056   | -0.4486  | 2.55965  |
| O                                            | 0.43171      | -3.26949 | 0.68253  | H                             | 1.36736  | -0.41016 | 0.96543  |
| C                                            | -0.51126     | -3.69466 | -2.2164  | C                             | 5.12616  | -0.54965 | 1.89721  |
| C                                            | -0.00707     | -5.14384 | -2.08561 | H                             | 5.50836  | -0.56453 | -0.21937 |
| H                                            | 0.92533      | -5.26161 | -2.65536 | C                             | 4.15948  | -0.50536 | 2.90173  |
| H                                            | 0.20244      | -5.42478 | -1.03625 | H                             | 2.04612  | -0.41908 | 3.33594  |
| H                                            | -1.29118     | -3.46445 | -1.44816 | H                             | 6.18055  | -0.59683 | 2.15581  |
| H                                            | -0.83001     | -3.42322 | -3.23358 | H                             | 4.45717  | -0.51959 | 3.94665  |
| C                                            | -1.07327     | -6.06688 | -2.66149 | C                             | 4.34739  | -0.67011 | -2.55307 |
| C                                            | -1.23527     | -6.13177 | -4.05412 | C                             | 4.6998   | -1.95083 | -3.00324 |
| C                                            | -1.93695     | -6.80749 | -1.84974 | C                             | 5.17574  | 0.42009  | -2.86145 |
| C                                            | -2.23482     | -6.91301 | -4.62588 | C                             | 5.87212  | -2.14119 | -3.73457 |
| H                                            | -0.56725     | -5.5562  | -4.69761 | H                             | 4.04427  | -2.79225 | -2.80037 |
| C                                            | -2.94442     | -7.59637 | -2.41926 | C                             | 6.34471  | 0.22625  | -3.59852 |
| H                                            | -1.8244      | -6.76894 | -0.76787 | H                             | 4.90493  | 1.41961  | -2.53477 |
| C                                            | -3.09622     | -7.65407 | -3.80671 | C                             | 6.6954   | -1.05378 | -4.0332  |
| H                                            | -2.34531     | -6.95639 | -5.7009  | H                             | 6.13229  | -3.13619 | -4.08436 |
| H                                            | -3.60707     | -8.16711 | -1.77302 | H                             | 6.97721  | 1.07679  | -3.83788 |
| H                                            | -3.87348     | -8.26933 | -4.24592 | H                             | 7.60308  | -1.20147 | -4.61213 |
| Thermal correction to Energy=                | 0.463272     |          |          | Cl                            | 1.25669  | -1.81741 | -4.4408  |
| Thermal correction to Enthalpy=              | 0.464217     |          |          | H                             | 1.24204  | 0.71075  | -3.68263 |
| Thermal correction to Gibbs Free Energy=     | 0.364617     |          |          | H                             | 0.48265  | 3.01689  | -4.16548 |
| Sum of electronic and zero-point Energies=   | -2046.457198 |          |          | Pd                            | 1.1581   | -2.084   | -2.03436 |
| Sum of electronic and thermal Energies=      | -2046.426656 |          |          | C                             | 0.56835  | -2.88915 | -0.45906 |
| Sum of electronic and thermal Enthalpies=    | -2046.425712 |          |          | O                             | 0.41269  | -3.26714 | 0.62947  |
| Sum of electronic and thermal Free Energies= | -2046.525311 |          |          | C                             | -0.51101 | -3.7291  | -1.95181 |
| SCF Done: E(RM06) = -2047.512617             |              |          |          | C                             | -0.00472 | -5.16813 | -2.06302 |
|                                              |              |          |          | H                             | 0.89506  | -5.1869  | -2.68766 |
| TS4b                                         |              |          |          | H                             | 0.27519  | -5.54801 | -1.07333 |
| Number of imaginary frequencies=1            |              |          |          | H                             | -1.39523 | -3.62246 | -1.32126 |
| Charge = 0 Multiplicity = 1                  |              |          |          | H                             | -0.72909 | -3.28837 | -2.92816 |
| C                                            | 1.49461      | 1.52049  | -3.00287 | C                             | -1.07353 | -6.0599  | -2.66956 |
| C                                            | 1.06995      | 2.8217   | -3.27246 | C                             | -1.23959 | -6.12673 | -4.0606  |
| C                                            | 2.25507      | 1.25502  | -1.85095 | C                             | -1.9363  | -6.80358 | -1.85343 |
| C                                            | 1.38996      | 3.86472  | -2.40018 | C                             | -2.242   | -6.91905 | -4.62057 |
| C                                            | 2.57464      | 2.30639  | -0.977   | H                             | -0.57718 | -5.55365 | -4.70591 |
| C                                            | 2.14216      | 3.60498  | -1.25344 | C                             | -2.94044 | -7.59722 | -2.41107 |
| H                                            | 1.05177      | 4.87568  | -2.61159 | H                             | -1.81583 | -6.765   | -0.77261 |
| H                                            | 3.15528      | 2.11586  | -0.08007 | C                             | -3.09621 | -7.65681 | -3.79713 |
| H                                            | 2.39308      | 4.41148  | -0.56957 | H                             | -2.35416 | -6.96256 | -5.70078 |
| P                                            | 2.82254      | -0.46998 | -1.55251 | H                             | -3.59739 | -8.17163 | -1.76292 |
| C                                            | 3.39047      | -0.47862 | 0.20055  | H                             | -3.87574 | -8.27581 | -4.2333  |
| C                                            | 2.42321      | -0.44244 | 1.21959  | Thermal correction to Energy= | 0.462271 |          |          |



|                                                         |         |          |          |                                                           |          |          |          |          |
|---------------------------------------------------------|---------|----------|----------|-----------------------------------------------------------|----------|----------|----------|----------|
| Thermal correction to Enthalpy= 0.463215                |         | H        | 1.24579  | 0.70701                                                   | -3.69591 |          |          |          |
| Thermal correction to Gibbs Free Energy= 0.363767       |         | H        | 0.49548  | 3.02084                                                   | -4.17113 |          |          |          |
| Sum of electronic and zero-point Energies= -2046.440913 |         | Pd       | 1.18684  | -2.04614                                                  | -2.06428 |          |          |          |
| Sum of electronic and thermal Energies= -2046.410929    |         | C        | 0.39417  | -3.0477                                                   | -0.64249 |          |          |          |
| Sum of electronic and thermal Enthalpies= -2046.409985  |         | O        | 0.44461  | -3.25659                                                  | 0.56643  |          |          |          |
| Sum of electronic and thermal Free Energies= -          |         | C        | -0.49836 | -3.77206                                                  | -1.62301 |          |          |          |
| 2046.509434SCF Done: E(RM06) = -2047.501952             |         | C        | -0.00707 | -5.20834                                                  | -1.98241 |          |          |          |
|                                                         |         | H        | 0.87373  | -5.13262                                                  | -2.64246 |          |          |          |
| Int5b                                                   |         | H        | 0.31854  | -5.69568                                                  | -1.04915 |          |          |          |
| Number of imaginary frequencies=0                       |         | H        | -1.51048 | -3.78695                                                  | -1.16436 |          |          |          |
| Charge =0 Multiplicity = 1                              |         | H        | -0.58491 | -3.15232                                                  | -2.56278 |          |          |          |
| C                                                       | 1.49672 | 1.51577  | -3.00762 | C                                                         | -1.07327 | -6.05398 | -2.64859 |          |
| C                                                       | 1.07331 | 2.8242   | -3.2766  | C                                                         | -1.22237 | -6.10597 | -4.04122 |          |
| C                                                       | 2.24684 | 1.24181  | -1.85371 | C                                                         | -1.94985 | -6.80749 | -1.84974 |          |
| C                                                       | 1.39096 | 3.85916  | -2.40183 | C                                                         | -2.22192 | -6.90011 | -4.61298 |          |
| C                                                       | 2.56413 | 2.29846  | -0.97725 | H                                                         | -0.55435 | -5.5304  | -4.67181 |          |
| C                                                       | 2.13957 | 3.59758  | -1.25317 | C                                                         | -2.94442 | -7.59637 | -2.41926 |          |
| H                                                       | 1.0604  | 4.87722  | -2.61282 | H                                                         | -1.8373  | -6.78184 | -0.76787 |          |
| H                                                       | 3.14203 | 2.09978  | -0.07887 | C                                                         | -3.08332 | -7.64117 | -3.80671 |          |
| H                                                       | 2.39533 | 4.40302  | -0.56738 | H                                                         | -2.31951 | -6.93059 | -5.7009  |          |
| P                                                       | 2.8069  | -0.48349 | -1.53618 | H                                                         | -3.60707 | -8.18001 | -1.78592 |          |
| C                                                       | 3.38723 | -0.48802 | 0.20352  | H                                                         |          | -3.86058 | -8.25643 | -4.25882 |
| C                                                       | 2.41955 | -0.45975 | 1.22215  | Thermal correction to Energy= 0.465042                    |          |          |          |          |
| C                                                       | 4.7435  | -0.53629 | 0.54914  | Thermal correction to Enthalpy= 0.465986                  |          |          |          |          |
| C                                                       | 2.80156 | -0.46039 | 2.55563  | Thermal correction to Gibbs Free Energy= 0.366443         |          |          |          |          |
| H                                                       | 1.36382 | -0.44795 | 0.96093  | Sum of electronic and zero-point Energies= -2046.469473   |          |          |          |          |
| C                                                       | 5.12239 | -0.55379 | 1.89386  | Sum of electronic and thermal Energies= -2046.439381      |          |          |          |          |
| H                                                       | 5.50532 | -0.56674 | -0.22257 | Sum of electronic and thermal Enthalpies= -2046.438437    |          |          |          |          |
| C                                                       | 4.1553  | -0.51051 | 2.89808  | Sum of electronic and thermal Free Energies= -2046.537980 |          |          |          |          |
| H                                                       | 2.0418  | -0.43193 | 3.33837  | SCF Done: E(RM06) = -2047.533801                          |          |          |          |          |
| H                                                       | 6.17669 | -0.59437 | 2.1528   |                                                           |          |          |          |          |
| H                                                       | 4.45265 | -0.51896 | 3.94308  | TS6b                                                      |          |          |          |          |
| C                                                       | 4.3316  | -0.6769  | -2.55701 | Number of imaginary frequencies=1                         |          |          |          |          |
| C                                                       | 4.68932 | -1.95689 | -3.01026 | Charge =0 Multiplicity = 1                                |          |          |          |          |
| C                                                       | 5.16127 | 0.41315  | -2.85578 | P                                                         | -2.38032 | 0.67693  | 0.39211  |          |
| C                                                       | 5.86825 | -2.14006 | -3.74186 | C                                                         | -3.27615 | 0.46841  | 1.99878  |          |
| H                                                       | 4.03951 | -2.79805 | -2.80946 | C                                                         | -3.69067 | -0.82206 | 2.37311  |          |
| C                                                       | 6.33017 | 0.22649  | -3.59305 | C                                                         | -3.49261 | 1.5289   | 2.88878  |          |
| H                                                       | 4.89154 | 1.41217  | -2.52666 | C                                                         | -4.30747 | -1.04325 | 3.60366  |          |
| C                                                       | 6.68615 | -1.05286 | -4.03759 | C                                                         | -4.10589 | 1.30426  | 4.1246   |          |
| H                                                       | 6.12735 | -3.13448 | -4.09408 | C                                                         | -4.51426 | 0.02073  | 4.48652  |          |
| H                                                       | 6.96372 | 1.07688  | -3.83013 | C                                                         | -3.55867 | -0.02049 | -0.83578 |          |
| H                                                       | 7.59377 | -1.19346 | -4.61001 | C                                                         | -3.0363  | -0.67513 | -1.96105 |          |
| Cl                                                      | 1.25251 | -1.8044  | -4.4861  | C                                                         | -4.9534  | 0.08935  | -0.6871  |          |

|    |          |          |          |                                                           |          |          |          |
|----|----------|----------|----------|-----------------------------------------------------------|----------|----------|----------|
| C  | -3.89697 | -1.19987 | -2.92886 | H                                                         | 2.84052  | -1.88548 | 4.15101  |
| C  | -5.80686 | -0.43404 | -1.6579  | C                                                         | 4.80594  | -4.32174 | 2.8172   |
| C  | -5.27879 | -1.07746 | -2.78171 | H                                                         | 4.07719  | -6.1321  | 1.89891  |
| C  | -2.38444 | 2.50264  | 0.10173  | H                                                         | 5.21692  | -2.43993 | 3.78864  |
| C  | -3.39885 | 3.17118  | -0.59997 | H                                                         | 5.8532   | -4.56062 | 2.6549   |
| C  | -1.29877 | 3.24655  | 0.59572  | Thermal correction to Energy= 0.500489                    |          |          |          |
| C  | -3.33239 | 4.55224  | -0.79238 | Thermal correction to Enthalpy= 0.501433                  |          |          |          |
| C  | -1.2389  | 4.62835  | 0.41026  | Thermal correction to Gibbs Free Energy= 0.398354         |          |          |          |
| C  | -2.25643 | 5.28382  | -0.28583 | Sum of electronic and zero-point Energies= -2102.956925   |          |          |          |
| H  | -1.96367 | -0.80945 | -2.07636 | Sum of electronic and thermal Energies= -2102.925392      |          |          |          |
| H  | -5.37187 | 0.57264  | 0.1914   | Sum of electronic and thermal Enthalpies= -2102.924447    |          |          |          |
| H  | -4.1221  | 5.05581  | -1.34359 | Sum of electronic and thermal Free Energies= -2103.027526 |          |          |          |
| H  | -0.39274 | 5.18845  | 0.79892  | SCF Done: E(RM06) = -2104.05934004                        |          |          |          |
| H  | -2.20653 | 6.35824  | -0.44072 |                                                           |          |          |          |
| H  | -0.4961  | 2.73623  | 1.1244   | P1                                                        |          |          |          |
| H  | -4.23564 | 2.61418  | -1.00857 | Number of imaginary frequencies=0                         |          |          |          |
| H  | -3.4748  | -1.71625 | -3.78599 | Charge = 0 Multiplicity = 1                               |          |          |          |
| H  | -6.88316 | -0.34511 | -1.53452 | C                                                         | 3.10644  | -1.68151 | -2.42024 |
| H  | -5.94643 | -1.49026 | -3.53367 | C                                                         | 4.46372  | -2.35105 | -2.69142 |
| H  | -3.54672 | -1.65478 | 1.68867  | C                                                         | 1.94587  | -2.66245 | -2.48931 |
| H  | -3.18527 | 2.53474  | 2.62058  | N                                                         | 0.68395  | -2.11054 | -2.21226 |
| H  | -4.63113 | -2.04562 | 3.87223  | O                                                         | 2.06152  | -3.82829 | -2.81991 |
| H  | -4.26757 | 2.13908  | 4.80152  | H                                                         | 4.42115  | -2.85422 | -3.66266 |
| H  | -4.99324 | -0.15122 | 5.44656  | H                                                         | -0.02353 | -2.82265 | -2.04202 |
| Pd | -0.20684 | -0.10657 | 0.41298  | H                                                         | 0.63033  | -1.3537  | -1.52079 |
| C  | 0.58152  | -1.90165 | 1.30429  | H                                                         | 3.10725  | -1.19512 | -1.43616 |
| H  | 0.20626  | -2.75127 | -0.76612 | C                                                         | 5.60963  | -1.36106 | -2.66079 |
| Cl | 0.03183  | -2.55237 | -2.4581  | C                                                         | 6.12977  | -0.90116 | -1.44171 |
| N  | 0.29926  | -3.03318 | 0.4558   | C                                                         | 6.15929  | -0.85915 | -3.84771 |
| H  | -0.5664  | -3.5166  | 0.70299  | C                                                         | 7.16265  | 0.03655  | -1.40947 |
| H  | 1.07408  | -3.70631 | 0.50692  | H                                                         | 5.7196   | -1.27842 | -0.50729 |
| O  | 1.58471  | -1.21342 | 0.96212  | C                                                         | 7.19484  | 0.07792  | -3.82182 |
| C  | 0.13937  | -2.04646 | 2.76035  | H                                                         | 5.77321  | -1.20921 | -4.80268 |
| H  | -0.95289 | -2.00049 | 2.84056  | C                                                         | 7.69979  | 0.53073  | -2.60132 |
| C  | 0.62781  | -3.35745 | 3.44307  | H                                                         | 7.55145  | 0.37657  | -0.45285 |
| H  | 0.5341   | -1.17053 | 3.28091  | H                                                         | 7.61069  | 0.44862  | -4.75542 |
| H  | 0.41129  | -3.25615 | 4.51486  | H                                                         | 8.50998  | 1.25499  | -2.57835 |
| H  | 0.01694  | -4.20168 | 3.09714  | H                                                         | 2.92228  | -0.87362 | -3.14091 |
| C  | 2.09182  | -3.69133 | 3.2344   | H                                                         | 4.62259  | -3.14058 | -1.94737 |
| C  | 2.46543  | -4.885   | 2.60038  | Thermal correction to Energy= 0.195103                    |          |          |          |
| C  | 3.10454  | -2.81854 | 3.65965  | Thermal correction to Enthalpy= 0.196048                  |          |          |          |
| C  | 3.81108  | -5.20066 | 2.39122  | Thermal correction to Gibbs Free Energy= 0.147765         |          |          |          |
| H  | 1.69549  | -5.58845 | 2.28601  | Sum of electronic and zero-point Energies= -479.382865    |          |          |          |
| C  | 4.44742  | -3.13041 | 3.45435  | Sum of electronic and thermal Energies= -479.372456       |          |          |          |

|                                              |                |                |          |          |          |          |          |
|----------------------------------------------|----------------|----------------|----------|----------|----------|----------|----------|
| Sum of electronic and thermal Enthalpies=    | -479.371512    |                | C        | 3.23199  | -0.75345 | 2.92776  |          |
| Sum of electronic and thermal Free Energies= | -479.419795    |                | C        | 5.10467  | -0.20721 | 1.49493  |          |
| SCF Done: E(RM06) =                          | -479.384303608 |                | C        | 4.09234  | -0.83961 | 4.02096  |          |
|                                              |                |                | C        | 5.96615  | -0.30689 | 2.59214  |          |
|                                              |                |                | C        | 5.46323  | -0.61866 | 3.85519  |          |
| P2                                           |                |                | C        | 3.56622  | 0.0436   | -1.22141 |          |
| Number of imaginary frequencies=             | 0              |                | C        | 3.8253   | 1.36108  | -1.62992 |          |
| Charge =                                     | 0              | Multiplicity = | 1        | 4.11235  | -1.0219  | -1.95904 |          |
| C                                            | 3.46996        | -1.64648       | -1.00242 | C        | 4.61937  | 1.60758  | -2.75158 |
| C                                            | 3.73481        | -1.67771       | 0.50855  | C        | 4.9137   | -0.76988 | -3.07365 |
| C                                            | 1.96987        | -1.66327       | -1.30767 | C        | 5.16657  | 0.54436  | -3.473   |
| N                                            | 1.71972        | -1.50267       | -2.80937 | C        | 1.54266  | 1.1485   | 0.59222  |
| O                                            | 1.13644        | -2.45081       | -0.75062 | C        | 2.04139  | 2.22341  | 1.34582  |
| H                                            | 3.32272        | -0.78128       | 0.98287  | C        | 0.23971  | 1.22339  | 0.07502  |
| H                                            | 2.03254        | -2.35503       | -3.29031 | C        | 1.25352  | 3.35392  | 1.5687   |
| H                                            | 0.71271        | -1.40415       | -2.9638  | C        | -0.54287 | 2.35763  | 0.29557  |
| H                                            | 3.27796        | -2.55313       | 0.97935  | C        | -0.03846 | 3.42368  | 1.04293  |
| C                                            | 4.14611        | -2.80197       | -1.74972 | H        | 1.64851  | 4.17799  | 2.15683  |
| C                                            | 4.95774        | -2.53786       | -2.86285 | H        | -1.55022 | 2.40188  | -0.10924 |
| C                                            | 3.94686        | -4.13559       | -1.35883 | H        | -0.65173 | 4.30287  | 1.22136  |
| C                                            | 5.57719        | -3.58356       | -3.55293 | H        | -0.16477 | 0.39336  | -0.49741 |
| H                                            | 5.07964        | -1.51319       | -3.20613 | H        | 3.04116  | 2.17465  | 1.76696  |
| C                                            | 4.56716        | -5.17799       | -2.04795 | H        | 4.80837  | 2.63202  | -3.06146 |
| H                                            | 3.29895        | -4.35895       | -0.51585 | H        | 5.33088  | -1.6045  | -3.62988 |
| C                                            | 5.38911        | -4.90457       | -3.14481 | H        | 5.78363  | 0.73956  | -4.34602 |
| H                                            | 6.20241        | -3.36011       | -4.41322 | H        | 3.91251  | -2.0521  | -1.67171 |
| H                                            | 4.40705        | -6.20495       | -1.7293  | H        | 3.40211  | 2.19512  | -1.07869 |
| H                                            | 5.87221        | -5.71733       | -3.68093 | H        | 3.69348  | -1.08959 | 5.00021  |
| H                                            | 4.81265        | -1.70589       | 0.69598  | H        | 7.03066  | -0.13731 | 2.4546   |
| H                                            | 3.86914        | -0.71256       | -1.40993 | H        | 6.13435  | -0.69497 | 4.7063   |
| Thermal correction to Energy=                | 0.775268       |                | H        | 5.50771  | 0.04195  | 0.51859  |          |
| Thermal correction to Enthalpy=              | 0.776213       |                | H        | 2.1713   | -0.94833 | 3.0635   |          |
| Thermal correction to Gibbs Free Energy=     | 0.654251       |                | Pd       | 1.28814  | -2.40924 | -0.11763 |          |
| Sum of electronic and zero-point Energies=   | -2264.779669   |                | C        | 1.98604  | -3.59562 | 1.36851  |          |
| Sum of electronic and thermal Energies=      | -2264.736129   |                | O        | 1.38885  | -4.09218 | 2.29564  |          |
| Sum of electronic and thermal Enthalpies=    | -2264.735185   |                | C        | 0.12914  | -4.04584 | -0.87677 |          |
| Sum of electronic and thermal Free Energies= | -2264.857147   |                | C        | -0.66225 | -4.94426 | 0.04797  |          |
| SCF Done: E(RwB97XD) =                       | -2266.46875373 |                | H        | -0.0093  | -5.69584 | 0.49726  |          |
|                                              |                |                | H        | -1.12739 | -4.39416 | 0.87202  |          |
| TS4c                                         |                |                | H        | 0.87117  | -4.5764  | -1.47673 |          |
| Number of imaginary frequencies=             | 1              |                | H        | -1.45456 | -5.47584 | -0.50118 |          |
| Charge =                                     | 0              | Multiplicity = | 1        | C        | -0.5233  | -2.9432  | -1.58154 |
| P                                            | 2.52928        | -0.36893       | 0.24591  | C        | -1.83569 | -2.47957 | -1.28178 |
| C                                            | 3.72793        | -0.42692       | 1.65166  | C        | 0.23941  | -2.18311 | -2.51586 |

|                                              |                |          |          |   |          |          |          |
|----------------------------------------------|----------------|----------|----------|---|----------|----------|----------|
| C                                            | -2.35867       | -1.36302 | -1.91243 | C | -2.54965 | 4.82777  | -0.5768  |
| H                                            | -2.44          | -3.02988 | -0.56776 | C | 3.31332  | 1.92578  | 1.75679  |
| C                                            | -0.30192       | -1.04549 | -3.13892 | C | 2.41789  | 2.87166  | 2.28699  |
| H                                            | 1.2109         | -2.55575 | -2.8325  | C | 4.49372  | 1.65125  | 2.46309  |
| C                                            | -1.5959        | -0.63564 | -2.84599 | C | 2.70628  | 3.53886  | 3.47606  |
| H                                            | -3.37446       | -1.04794 | -1.68643 | C | 4.77437  | 2.31027  | 3.66349  |
| H                                            | 0.29671        | -0.50173 | -3.86467 | C | 3.88612  | 3.25823  | 4.17088  |
| H                                            | -2.02122       | 0.2354   | -3.33671 | C | 4.37422  | 0.07971  | -0.20314 |
| H                                            | 3.66985        | -4.5696  | 0.00224  | C | 5.51588  | 0.66334  | -0.77681 |
| Cl                                           | 4.04167        | -5.08475 | -1.34783 | C | 4.39301  | -1.29088 | 0.09872  |
| N                                            | 3.40092        | -3.94243 | 1.22618  | C | 6.65276  | -0.1045  | -1.0315  |
| H                                            | 3.71237        | -4.50423 | 2.0261   | C | 5.53564  | -2.05522 | -0.14919 |
| H                                            | 3.97761        | -3.10305 | 1.14907  | C | 6.66692  | -1.46494 | -0.71402 |
| Thermal correction to Energy=                | 0.498222       |          |          | C | 2.86371  | 2.39569  | -1.06333 |
| Thermal correction to Enthalpy=              | 0.499166       |          |          | C | 3.56453  | 3.60161  | -0.89794 |
| Thermal correction to Gibbs Free Energy=     | 0.395653       |          |          | C | 2.1377   | 2.19157  | -2.24861 |
| Sum of electronic and zero-point Energies=   | -2102.952518   |          |          | C | 3.54717  | 4.57423  | -1.8999  |
| Sum of electronic and thermal Energies=      | -2102.920196   |          |          | C | 2.1259   | 3.16264  | -3.25119 |
| Sum of electronic and thermal Enthalpies=    | -2102.919252   |          |          | C | 2.83123  | 4.35581  | -3.07926 |
| Sum of electronic and thermal Free Energies= | -2104.04890550 |          |          | H | 4.09261  | 5.50369  | -1.75679 |
| 2103.022765SCF SCF Done: E(RM06) =           | -2104.04890550 |          |          | H | 1.55113  | 2.98838  | -4.15644 |
|                                              |                |          |          | H | 2.81687  | 5.1155   | -3.85654 |
| Int5c                                        |                |          |          | H | -3.05268 | 0.04256  | -1.04564 |
| Number of imaginary frequencies=0            |                |          |          | H | -2.70588 | -0.91323 | 3.1438   |
| Charge =0 Multiplicity = 1                   |                |          |          | H | 1.55673  | 1.28198  | -2.37779 |
| P                                            | -1.18035       | 0.69582  | 1.10382  | H | 4.11709  | 3.78657  | 0.01843  |
| P                                            | 2.84116        | 1.04173  | 0.1976   | H | 7.52714  | 0.36042  | -1.47988 |
| C                                            | -0.97933       | 1.04462  | 2.91809  | H | 5.5342   | -3.1159  | 0.08826  |
| C                                            | 0.1145         | 0.47575  | 3.58676  | H | 7.55286  | -2.06209 | -0.91438 |
| C                                            | -1.87646       | 1.83883  | 3.65169  | H | 3.50208  | -1.76257 | 0.49942  |
| C                                            | 0.30141        | 0.67858  | 4.95637  | H | 5.51726  | 1.71873  | -1.03155 |
| C                                            | -1.68799       | 2.04632  | 5.01807  | H | 2.00281  | 4.26958  | 3.86602  |
| C                                            | -0.6005        | 1.46322  | 5.67478  | H | 5.69428  | 2.08336  | 4.19652  |
| C                                            | -2.73447       | -0.31899 | 1.06616  | H | 4.10768  | 3.77292  | 5.10218  |
| C                                            | -3.40266       | -0.48469 | -0.16192 | H | 5.2001   | 0.9247   | 2.07575  |
| C                                            | -3.20442       | -1.02214 | 2.18584  | H | 1.48791  | 3.08753  | 1.76853  |
| C                                            | -4.51712       | -1.31768 | -0.25768 | H | -4.50952 | 4.34515  | 0.18703  |
| C                                            | -4.3173        | -1.86286 | 2.08479  | H | -0.50846 | 4.99615  | -1.2611  |
| C                                            | -4.97948       | -2.01163 | 0.86566  | H | -2.85043 | 5.79759  | -0.96449 |
| C                                            | -1.7761        | 2.31309  | 0.4217   | H | 0.15629  | 2.7802   | -0.40826 |
| C                                            | -3.0995        | 2.76439  | 0.56389  | H | -3.8419  | 2.13301  | 1.04267  |
| C                                            | -0.85641       | 3.13257  | -0.24738 | H | -5.02705 | -1.42175 | -1.21212 |
| C                                            | -3.48111       | 4.01269  | 0.07076  | H | -4.66804 | -2.3955  | 2.96516  |
| C                                            | -1.2373        | 4.38286  | -0.7383  | H | -5.85034 | -2.65764 | 0.7903   |

|                                              |                |          |          |    |          |          |          |
|----------------------------------------------|----------------|----------|----------|----|----------|----------|----------|
| H                                            | 0.82995        | -0.11342 | 3.01918  | C  | 3.41184  | -0.41961 | 4.29959  |
| H                                            | -2.72162       | 2.30501  | 3.15577  | C  | 5.52979  | 0.13818  | 3.28263  |
| H                                            | 1.15783        | 0.23273  | 5.45478  | C  | 4.78851  | -0.20439 | 4.41348  |
| H                                            | -2.39033       | 2.66537  | 5.57049  | C  | 3.92918  | 0.35787  | -0.96443 |
| H                                            | -0.45539       | 1.62695  | 6.7395   | C  | 4.57699  | 1.57521  | -1.23096 |
| Pd                                           | 0.75077        | -0.28285 | 0.18917  | C  | 4.29135  | -0.78473 | -1.69741 |
| C                                            | 0.87906        | -0.8392  | -1.9458  | C  | 5.57737  | 1.64568  | -2.20177 |
| N                                            | -0.02917       | -0.83868 | -3.0865  | C  | 5.29618  | -0.7092  | -2.66428 |
| H                                            | -0.89043       | -1.34656 | -2.88537 | C  | 5.94071  | 0.50283  | -2.91791 |
| H                                            | 0.444          | -1.29221 | -3.86886 | C  | 1.85927  | 1.88245  | 0.39844  |
| O                                            | 2.11377        | -0.86763 | -2.20683 | C  | 2.31506  | 2.88407  | 1.26936  |
| C                                            | -0.22823       | -2.10928 | 0.28323  | C  | 0.78172  | 2.16562  | -0.45716 |
| H                                            | -1.20208       | -1.63027 | 0.42344  | C  | 1.71229  | 4.14419  | 1.27612  |
| C                                            | -0.47954       | -3.49738 | -0.31233 | C  | 0.18705  | 3.42752  | -0.4547  |
| C                                            | 0.58482        | -4.30063 | -0.75092 | C  | 0.65046  | 4.41946  | 0.41295  |
| C                                            | -1.78525       | -3.99406 | -0.42489 | H  | 2.07302  | 4.9095   | 1.95851  |
| C                                            | 0.34806        | -5.56879 | -1.28068 | H  | -0.64439 | 3.63213  | -1.12389 |
| H                                            | 1.60173        | -3.92189 | -0.6838  | H  | 0.18147  | 5.39981  | 0.42094  |
| C                                            | -2.02379       | -5.26544 | -0.95436 | H  | 0.40392  | 1.39186  | -1.12151 |
| H                                            | -2.61943       | -3.38185 | -0.0887  | H  | 3.13723  | 2.67956  | 1.94855  |
| C                                            | -0.95788       | -6.05671 | -1.38333 | H  | 6.0682   | 2.59469  | -2.40164 |
| H                                            | 1.18409        | -6.17716 | -1.6162  | H  | 5.56564  | -1.59989 | -3.2254  |
| H                                            | -3.04327       | -5.63478 | -1.03127 | H  | 6.71724  | 0.55989  | -3.67631 |
| H                                            | -1.14133       | -7.04479 | -1.79686 | H  | 3.78068  | -1.72827 | -1.52405 |
| C                                            | 0.47191        | -2.20608 | 1.64539  | H  | 4.29401  | 2.47239  | -0.68833 |
| H                                            | 1.47336        | -2.63404 | 1.54296  | H  | 2.82721  | -0.68945 | 5.17532  |
| H                                            | 0.5715         | -1.21509 | 2.09788  | H  | 6.60132  | 0.30207  | 3.36219  |
| H                                            | -0.11143       | -2.84247 | 2.31868  | H  | 5.27917  | -0.30842 | 5.37754  |
| Thermal correction to Energy=                | 0.783022       |          |          | H  | 5.48997  | 0.54179  | 1.16954  |
| Thermal correction to Enthalpy=              | 0.783966       |          |          | H  | 1.71841  | -0.48401 | 2.97063  |
| Thermal correction to Gibbs Free Energy=     | 0.649454       |          |          | Pd | 1.13722  | -1.56802 | -0.08739 |
| Sum of electronic and zero-point Energies=   | -2678.165481   |          |          | C  | -0.13428 | -3.37423 | -0.32124 |
| Sum of electronic and thermal Energies=      | -2678.118040   |          |          | C  | 1.91902  | -3.47167 | -0.12039 |
| Sum of electronic and thermal Enthalpies=    | -2678.117095   |          |          | N  | 2.19238  | -4.03918 | 1.11347  |
| Sum of electronic and thermal Free Energies= | -2678.251607   |          |          | O  | 2.48916  | -3.84321 | -1.13648 |
| SCF Done: E(RM06) =                          | -2679.18710933 |          |          | H  | 0.1038   | -4.33531 | -0.77171 |
|                                              |                |          |          | H  | 3.06745  | -4.55619 | 1.14768  |
| TS6c                                         |                |          |          | H  | 1.99691  | -3.46781 | 1.92528  |
| Number of imaginary frequencies=             | 1              |          |          | C  | -0.91008 | -3.59728 | 0.97569  |
| Charge =0 Multiplicity =                     | 1              |          |          | H  | -0.35537 | -4.27453 | 1.63061  |
| P                                            | 2.60623        | 0.19204  | 0.31344  | H  | -1.09882 | -2.6734  | 1.53205  |
| C                                            | 3.52198        | 0.05748  | 1.91565  | H  | -1.88566 | -4.05986 | 0.76341  |
| C                                            | 2.78658        | -0.29865 | 3.05943  | C  | -0.77542 | -2.51107 | -1.36958 |
| C                                            | 4.90145        | 0.27283  | 2.04088  | C  | -0.39636 | -2.65982 | -2.7264  |

|                                                           |          |          |          |                                                           |          |          |          |
|-----------------------------------------------------------|----------|----------|----------|-----------------------------------------------------------|----------|----------|----------|
| C                                                         | -1.75862 | -1.5415  | -1.06802 | H                                                         | 3.55002  | 2.34053  | 1.8575   |
| C                                                         | -0.97208 | -1.87975 | -3.72256 | H                                                         | 4.69882  | 2.84106  | -3.02763 |
| H                                                         | 0.36715  | -3.39156 | -2.97558 | H                                                         | 4.67553  | -1.39167 | -3.81987 |
| C                                                         | -2.33658 | -0.7647  | -2.07701 | H                                                         | 5.30067  | 0.92515  | -4.49305 |
| H                                                         | -2.09623 | -1.41643 | -0.04391 | H                                                         | 3.45589  | -1.78907 | -1.7227  |
| C                                                         | -1.94956 | -0.92754 | -3.40633 | H                                                         | 3.49469  | 2.45503  | -0.90759 |
| H                                                         | -0.66392 | -2.01871 | -4.75591 | H                                                         | 4.08282  | -1.07566 | 4.99071  |
| H                                                         | -3.10125 | -0.03673 | -1.8166  | H                                                         | 7.17421  | -0.94282 | 1.99923  |
| H                                                         | -2.40534 | -0.32772 | -4.18945 | H                                                         | 6.48273  | -1.29061 | 4.36299  |
| Thermal correction to Energy= 0.488182                    |          |          |          | H                                                         | 5.49369  | -0.37564 | 0.28114  |
| Thermal correction to Enthalpy= 0.489126                  |          |          |          | H                                                         | 2.39447  | -0.53477 | 3.27616  |
| Thermal correction to Gibbs Free Energy= 0.394072         |          |          |          | Pd                                                        | 1.0113   | -2.00758 | 0.05459  |
| Sum of electronic and zero-point Energies= -1642.136947   |          |          |          | C                                                         | 1.50826  | -3.37594 | 1.41213  |
| Sum of electronic and thermal Energies= -1642.107267      |          |          |          | O                                                         | 0.85962  | -3.87336 | 2.29322  |
| Sum of electronic and thermal Enthalpies= -1642.106322    |          |          |          | C                                                         | -0.26679 | -3.50551 | -0.60426 |
| Sum of electronic and thermal Free Energies= -1642.201377 |          |          |          | H                                                         | 0.21201  | -4.481   | -0.70689 |
| SCF Done: E(RM06) = -1643.21834393                        |          |          |          | C                                                         | -0.71098 | -2.95167 | -1.96488 |
|                                                           |          |          |          | H                                                         | 3.15192  | -4.38101 | -0.01053 |
| TS4d                                                      |          |          |          | Cl                                                        | 3.52696  | -4.83463 | -1.39397 |
| Number of imaginary frequencies=1                         |          |          |          | N                                                         | 2.91292  | -3.82831 | 1.23887  |
| Charge =0 Multiplicity = 1                                |          |          |          | H                                                         | 3.16311  | -4.4699  | 1.99845  |
| P                                                         | 2.49931  | -0.07662 | 0.40844  | H                                                         | 3.5522   | -3.03099 | 1.2359   |
| C                                                         | 3.82432  | -0.40334 | 1.6537   | H                                                         | -1.08411 | -3.57084 | 0.12083  |
| C                                                         | 3.44086  | -0.61361 | 2.99187  | H                                                         | 0.1342   | -2.97243 | -2.66353 |
| C                                                         | 5.1783   | -0.52795 | 1.30835  | H                                                         | -1.03376 | -1.90151 | -1.87496 |
| C                                                         | 4.3939   | -0.92217 | 3.96102  | C                                                         | -1.86466 | -3.75727 | -2.54639 |
| C                                                         | 6.12946  | -0.84861 | 2.28243  | C                                                         | -1.61313 | -4.9318  | -3.26953 |
| C                                                         | 5.74178  | -1.04266 | 3.60808  | C                                                         | -3.19457 | -3.36935 | -2.33917 |
| C                                                         | 3.40026  | 0.3074   | -1.15215 | C                                                         | -2.66512 | -5.69618 | -3.77544 |
| C                                                         | 3.75489  | 1.60982  | -1.53711 | H                                                         | -0.58511 | -5.24573 | -3.43646 |
| C                                                         | 3.7313   | -0.77136 | -1.99286 | C                                                         | -4.24935 | -4.13231 | -2.84341 |
| C                                                         | 4.43438  | 1.82795  | -2.73652 | H                                                         | -3.40509 | -2.45938 | -1.78041 |
| C                                                         | 4.42179  | -0.54756 | -3.18517 | C                                                         | -3.98762 | -5.29922 | -3.56388 |
| C                                                         | 4.77177  | 0.75125  | -3.55984 | H                                                         | -2.45126 | -6.60154 | -4.33787 |
| C                                                         | 1.76047  | 1.51258  | 0.96863  | H                                                         | -5.27501 | -3.81281 | -2.67633 |
| C                                                         | 2.49993  | 2.50469  | 1.63365  | H                                                         | -4.80714 | -5.8935  | -3.95936 |
| C                                                         | 0.39895  | 1.73599  | 0.71226  | Thermal correction to Energy= 0.498597                    |          |          |          |
| C                                                         | 1.88963  | 3.69844  | 2.0205   | Thermal correction to Enthalpy= 0.499541                  |          |          |          |
| C                                                         | -0.20877 | 2.93248  | 1.09557  | Thermal correction to Gibbs Free Energy= 0.393563         |          |          |          |
| C                                                         | 0.53623  | 3.91513  | 1.74981  | Sum of electronic and zero-point Energies= -2102.930709   |          |          |          |
| H                                                         | 2.4707   | 4.45804  | 2.53643  | Sum of electronic and thermal Energies= -2102.898319      |          |          |          |
| H                                                         | -1.26417 | 3.091    | 0.89241  | Sum of electronic and thermal Enthalpies= -2102.897374    |          |          |          |
| H                                                         | 0.06261  | 4.84409  | 2.05525  | Sum of electronic and thermal Free Energies= -2103.003353 |          |          |          |
| H                                                         | -0.18958 | 0.96453  | 0.22132  | SCF Done: E(RM06) = -2104.02624215                        |          |          |          |

|                                   |                  |          |          |    |          |          |          |
|-----------------------------------|------------------|----------|----------|----|----------|----------|----------|
|                                   |                  |          |          | H  | 3.79962  | 6.37755  | -0.09127 |
| Int5d                             |                  |          |          | H  | -1.73631 | -0.66831 | -2.13517 |
| Number of imaginary frequencies=0 |                  |          |          | H  | -4.65733 | -0.35871 | 1.01717  |
| Charge = 0                        | Multiplicity = 1 |          |          | H  | 1.57937  | 2.95969  | -1.47628 |
| P                                 | -1.85321         | 0.57949  | 0.47691  | H  | 4.84587  | 2.45179  | 1.29373  |
| P                                 | 2.87787          | 0.69952  | -0.14975 | H  | 6.41815  | 0.76248  | -3.67053 |
| C                                 | -2.46035         | 0.6455   | 2.22311  | H  | 3.27256  | -2.12631 | -4.20128 |
| C                                 | -2.72039         | -0.54714 | 2.91804  | H  | 5.40029  | -1.09565 | -4.97304 |
| C                                 | -2.61307         | 1.86582  | 2.89892  | H  | 2.16732  | -1.296   | -2.14635 |
| C                                 | -3.13513         | -0.51761 | 4.2487   | H  | 5.33123  | 1.56984  | -1.60345 |
| C                                 | -3.02069         | 1.89133  | 4.23436  | H  | 4.13293  | 0.09013  | 4.59779  |
| C                                 | -3.28569         | 0.70171  | 4.91254  | H  | 6.78861  | -1.78209 | 1.77599  |
| C                                 | -3.07796         | -0.43354 | -0.46006 | H  | 6.16565  | -1.27031 | 4.12953  |
| C                                 | -2.71351         | -0.91438 | -1.72903 | H  | 5.41173  | -0.9346  | -0.08622 |
| C                                 | -4.35993         | -0.7192  | 0.03786  | H  | 2.73435  | 0.90901  | 2.74375  |
| C                                 | -3.6164          | -1.66996 | -2.47902 | H  | -4.73251 | 4.35183  | -1.09708 |
| C                                 | -5.25666         | -1.47854 | -0.71628 | H  | -0.74778 | 5.39351  | 0.15469  |
| C                                 | -4.88635         | -1.95735 | -1.97438 | H  | -2.98421 | 6.07607  | -0.70628 |
| C                                 | -2.23917         | 2.33003  | 0.04595  | H  | -0.26843 | 3.01213  | 0.6026   |
| C                                 | -3.49436         | 2.71922  | -0.44068 | H  | -4.26496 | 1.97603  | -0.61868 |
| C                                 | -1.25336         | 3.30667  | 0.25202  | H  | -3.32425 | -2.03091 | -3.46158 |
| C                                 | -3.75822         | 4.06329  | -0.71153 | H  | -6.24441 | -1.69516 | -0.3178  |
| C                                 | -1.5235          | 4.65002  | -0.00756 | H  | -5.58576 | -2.54907 | -2.55938 |
| C                                 | -2.77643         | 5.03088  | -0.49265 | H  | -2.60673 | -1.50587 | 2.42346  |
| C                                 | 3.97782          | 0.05972  | 1.18938  | H  | -2.41967 | 2.80129  | 2.3857   |
| C                                 | 3.63002          | 0.3375   | 2.52344  | H  | -3.33138 | -1.45332 | 4.76424  |
| C                                 | 5.12414          | -0.7083  | 0.9349   | H  | -3.13528 | 2.84649  | 4.74017  |
| C                                 | 4.41743          | -0.13306 | 3.57321  | H  | -3.60551 | 0.72358  | 5.95104  |
| C                                 | 5.9051           | -1.18647 | 1.99027  | Pd | 0.49448  | 0.20057  | -0.03139 |
| C                                 | 5.5565           | -0.89842 | 3.30994  | C  | 0.52626  | -0.51571 | 1.84149  |
| C                                 | 3.69297          | 0.16153  | -1.70975 | C  | 0.11331  | -1.78435 | -0.22027 |
| C                                 | 4.88506          | 0.75118  | -2.16068 | H  | 0.16353  | -1.44904 | -1.26139 |
| C                                 | 3.11651          | -0.87321 | -2.45898 | C  | -1.21306 | -2.49933 | -0.01998 |
| C                                 | 5.49753          | 0.29694  | -3.32876 | H  | 0.95084  | -2.4226  | -0.03032 |
| C                                 | 3.73358          | -1.32887 | -3.62509 | H  | -1.9348  | -1.81042 | 0.36654  |
| C                                 | 4.9247           | -0.74655 | -4.06029 | H  | -1.55509 | -2.88571 | -0.95733 |
| C                                 | 3.17982          | 2.52809  | -0.08783 | C  | -0.80789 | -3.59359 | 0.98502  |
| C                                 | 4.21102          | 3.08651  | 0.6855   | C  | 0.29734  | -4.40447 | 0.72539  |
| C                                 | 2.37562          | 3.37821  | -0.86698 | C  | -1.54575 | -3.77399 | 2.15489  |
| C                                 | 4.43             | 4.46611  | 0.68344  | C  | 0.66416  | -5.39594 | 1.63514  |
| C                                 | 2.60421          | 4.75507  | -0.86671 | H  | 0.87838  | -4.26251 | -0.19737 |
| C                                 | 3.62756          | 5.30427  | -0.09112 | C  | -1.17836 | -4.76507 | 3.06549  |
| H                                 | 5.23135          | 4.88154  | 1.28902  | H  | -2.41676 | -3.13486 | 2.35977  |
| H                                 | 1.97656          | 5.39736  | -1.47898 | C  | -0.07369 | -5.5761  | 2.80576  |

|                                                           |          |          |          |                                                           |          |          |          |
|-----------------------------------------------------------|----------|----------|----------|-----------------------------------------------------------|----------|----------|----------|
| H                                                         | 1.53493  | -6.03554 | 1.43026  | H                                                         | 5.86104  | -1.12857 | -3.18926 |
| H                                                         | -1.76006 | -4.9068  | 3.98799  | H                                                         | 6.80889  | 1.15321  | -3.49803 |
| H                                                         | 0.21576  | -6.35787 | 3.52294  | H                                                         | 4.09342  | -1.52381 | -1.51762 |
| O                                                         | 0.52448  | -1.9278  | 2.06707  | H                                                         | 4.20953  | 2.64606  | -0.42057 |
| N                                                         | 0.55138  | 0.41085  | 2.98244  | H                                                         | 3.03882  | -1.08321 | 5.20001  |
| H                                                         | -0.0531  | 0.06965  | 3.7023   | H                                                         | 6.64647  | 0.59139  | 3.55918  |
| H                                                         | 1.48445  | 0.47963  | 3.3355   | H                                                         | 5.39981  | -0.35141 | 5.49046  |
| Thermal correction to Energy= 0.783151                    |          |          |          | H                                                         | 5.5415   | 0.82444  | 1.35657  |
| Thermal correction to Enthalpy= 0.784095                  |          |          |          | H                                                         | 1.93994  | -0.87353 | 2.99212  |
| Thermal correction to Gibbs Free Energy= 0.648185         |          |          |          | Pd                                                        | 1.33997  | -1.67742 | -0.18544 |
| Sum of electronic and zero-point Energies= -2678.165077   |          |          |          | C                                                         | 0.15666  | -3.22506 | -0.70389 |
| Sum of electronic and thermal Energies= -2678.117599      |          |          |          | C                                                         | -0.96123 | -2.32729 | -1.36644 |
| Sum of electronic and thermal Enthalpies=-2678.116655     |          |          |          | C                                                         | 2.07473  | -3.57855 | -0.53108 |
| Sum of electronic and thermal Free Energies= -2678.252565 |          |          |          | N                                                         | 2.14892  | -4.37    | 0.60579  |
| SCF Done: E(RM06) = -2679.18370651                        |          |          |          | O                                                         | 2.7264   | -3.8046  | -1.52793 |
| TS6d                                                      |          |          |          | H                                                         | -0.60308 | -1.95033 | -2.33148 |
| Number of imaginary frequencies=1                         |          |          |          | H                                                         | -1.20775 | -1.45243 | -0.74748 |
| Charge = 0 Multiplicity = 1                               |          |          |          | C                                                         | -2.231   | -3.13037 | -1.57982 |
| P                                                         | 2.74228  | 0.15484  | 0.43313  | C                                                         | -3.25525 | -3.13007 | -0.62238 |
| C                                                         | 3.65713  | 0.013    | 2.02551  | C                                                         | -2.39466 | -3.92106 | -2.72654 |
| C                                                         | 2.96547  | -0.53512 | 3.11947  | C                                                         | -4.40887 | -3.89465 | -0.80286 |
| C                                                         | 4.98947  | 0.41404  | 2.19567  | H                                                         | -3.14844 | -2.51815 | 0.27111  |
| C                                                         | 3.58606  | -0.659   | 4.36247  | C                                                         | -3.54655 | -4.68698 | -2.91219 |
| C                                                         | 5.6116   | 0.28128  | 3.44022  | H                                                         | -1.61146 | -3.93267 | -3.48159 |
| C                                                         | 4.91232  | -0.25031 | 4.52449  | C                                                         | -4.55882 | -4.67702 | -1.95001 |
| C                                                         | 4.04972  | 0.5251   | -0.82041 | H                                                         | -5.19255 | -3.87524 | -0.05021 |
| C                                                         | 4.57945  | 1.81225  | -1.01034 | H                                                         | -3.65517 | -5.28838 | -3.81078 |
| C                                                         | 4.51862  | -0.52977 | -1.61968 | H                                                         | -5.45716 | -5.27042 | -2.0948  |
| C                                                         | 5.57005  | 2.03448  | -1.96778 | H                                                         | 0.28854  | -3.99959 | -1.46843 |
| C                                                         | 5.5124   | -0.30309 | -2.57493 | H                                                         | 2.99375  | -4.93652 | 0.66528  |
| C                                                         | 6.04118  | 0.97671  | -2.74922 | H                                                         | 1.83367  | -3.94757 | 1.46987  |
| C                                                         | 1.80685  | 1.7435   | 0.59136  | H                                                         | -0.26839 | -3.73339 | 0.16785  |
| C                                                         | 2.22693  | 2.82734  | 1.37632  | Thermal correction to Energy= 0.488028                    |          |          |          |
| C                                                         | 0.61843  | 1.85979  | -0.14823 | Thermal correction to Enthalpy= 0.488972                  |          |          |          |
| C                                                         | 1.47992  | 4.0092   | 1.40822  | Thermal correction to Gibbs Free Energy= 0.390760         |          |          |          |
| C                                                         | -0.11996 | 3.04293  | -0.12334 | Sum of electronic and zero-point Energies= -1642.135412   |          |          |          |
| C                                                         | 0.30987  | 4.11975  | 0.65638  | Sum of electronic and thermal Energies= -1642.105702      |          |          |          |
| H                                                         | 1.81244  | 4.84012  | 2.02502  | Sum of electronic and thermal Enthalpies= -1642.104758    |          |          |          |
| H                                                         | -1.03684 | 3.11946  | -0.70153 | Sum of electronic and thermal Free Energies= -1642.202970 |          |          |          |
| H                                                         | -0.27015 | 5.03822  | 0.68459  | SCF Done: E(RM06) = -1643.21041174                        |          |          |          |
| H                                                         | 0.27303  | 1.01493  | -0.73989 | Cat0'                                                     |          |          |          |
| H                                                         | 3.13008  | 2.74658  | 1.97324  | Number of imaginary frequencies=0                         |          |          |          |
| H                                                         | 5.96887  | 3.03606  | -2.10691 |                                                           |          |          |          |



Charge = 0 Multiplicity = 1

|   |          |          |          |                                              |              |          |          |
|---|----------|----------|----------|----------------------------------------------|--------------|----------|----------|
| C | -1.70028 | -2.60097 | 2.83976  | C                                            | -1.70028     | -2.60097 | 2.83976  |
| C | -3.70702 | 3.58013  | -0.34376 | H                                            | -0.80818     | -2.44227 | 0.88166  |
| C | -3.57843 | 2.20484  | -0.53601 | C                                            | -3.3887      | -0.95298 | 3.35946  |
| C | -2.36629 | 1.55875  | -0.25805 | H                                            | -3.82776     | 0.4739   | 1.81207  |
| C | -1.317   | 2.34224  | 0.23269  | C                                            | -2.62327     | -2.06013 | 3.7355   |
| C | -1.41184 | 3.72194  | 0.44051  | H                                            | -1.08945     | -3.45142 | 3.13029  |
| C | -2.63256 | 4.33138  | 0.13375  | H                                            | -4.10398     | -0.52283 | 4.05576  |
| H | -4.64841 | 4.07063  | -0.57422 | H                                            | -2.74136     | -2.49265 | 4.72561  |
| H | -4.41474 | 1.63592  | -0.92614 | C                                            | 2.35843      | -0.96062 | 1.01385  |
| H | -2.75444 | 5.4009   | 0.26858  | C                                            | 2.8378       | -0.25189 | 2.1241   |
| O | -0.13539 | 1.68586  | 0.51652  | C                                            | 2.19969      | -2.35274 | 1.11666  |
| C | -0.19437 | 4.4398   | 1.03539  | C                                            | 3.14874      | -0.92094 | 3.31111  |
| C | -0.22218 | 5.95093  | 0.75247  | H                                            | 2.97092      | 0.82362  | 2.06456  |
| H | -1.1119  | 6.41066  | 1.19359  | C                                            | 2.52602      | -3.02135 | 2.29551  |
| H | 0.64109  | 6.44677  | 1.2069   | H                                            | 1.81613      | -2.90872 | 0.2645   |
| H | -0.21884 | 6.16289  | -0.32179 | C                                            | 2.99735      | -2.30483 | 3.39933  |
| C | -0.19834 | 4.22109  | 2.57621  | H                                            | 3.51308      | -0.35663 | 4.16554  |
| H | -0.17987 | 3.15604  | 2.8267   | H                                            | 2.40675      | -4.10014 | 2.35543  |
| H | 0.67975  | 4.69548  | 3.02985  | H                                            | 3.24246      | -2.8233  | 4.32243  |
| H | -1.09944 | 4.6604   | 3.01959  | C                                            | 3.41274      | -0.47185 | -1.6525  |
| C | 1.01854  | 2.38531  | 0.23911  | C                                            | 3.28181      | -0.24422 | -3.03405 |
| C | 1.05641  | 3.76937  | 0.45263  | C                                            | 4.64105      | -0.91035 | -1.13774 |
| C | 2.10535  | 1.65179  | -0.25103 | C                                            | 4.37116      | -0.45547 | -3.87963 |
| C | 2.25259  | 4.43055  | 0.16083  | H                                            | 2.32938      | 0.09311  | -3.44144 |
| C | 3.29114  | 2.35306  | -0.5167  | C                                            | 5.72437      | -1.12818 | -1.99356 |
| C | 3.36286  | 3.72913  | -0.3112  | H                                            | 4.75565      | -1.089   | -0.07293 |
| H | 2.32696  | 5.50355  | 0.302    | C                                            | 5.59135      | -0.90067 | -3.36403 |
| H | 4.1521   | 1.82297  | -0.90736 | H                                            | 4.25877      | -0.28154 | -4.94619 |
| H | 4.2846   | 4.25995  | -0.53102 | H                                            | 6.66987      | -1.47699 | -1.58605 |
| P | 1.93017  | -0.15595 | -0.5933  | H                                            | 6.43421      | -1.0728  | -4.02853 |
| C | -3.59477 | -0.7418  | -1.4368  | P                                            | -2.06818     | -0.24513 | -0.52069 |
| C | -4.60418 | -1.54058 | -0.8816  | Pd                                           | -0.01248     | -1.07294 | -1.67391 |
| C | -3.70718 | -0.32551 | -2.77767 | H                                            | 1.12198      | -1.96334 | -2.33574 |
| C | -5.71386 | -1.91083 | -1.64779 | Cl                                           | -0.31025     | 0.76005  | -3.71909 |
| H | -4.53236 | -1.87483 | 0.14842  |                                              |              |          |          |
| C | -4.82313 | -0.68944 | -3.53127 | Thermal correction to Energy=                | 0.647634     |          |          |
| H | -2.9094  | 0.26364  | -3.22902 | Thermal correction to Enthalpy=              | 0.648578     |          |          |
| C | -5.8287  | -1.48259 | -2.97016 | Thermal correction to Gibbs Free Energy=     | 0.532682     |          |          |
| H | -6.48829 | -2.53206 | -1.20501 | Sum of electronic and zero-point Energies=   | -2850.331544 |          |          |
| H | -4.90094 | -0.35817 | -4.56347 | Sum of electronic and thermal Energies=      | -2850.291724 |          |          |
| H | -6.69357 | -1.76864 | -3.56318 | Sum of electronic and thermal Enthalpies=    | -2850.290780 |          |          |
| C | -2.31347 | -0.93336 | 1.17941  | Sum of electronic and thermal Free Energies= | -2850.406676 |          |          |
| C | -1.54523 | -2.03862 | 1.57096  | SCF Done: E(RM06) =                          | -2851.344145 |          |          |
| C | -3.23448 | -0.39191 | 2.09153  | TS1a'                                        |              |          |          |

|                                   |          |          |          |    |          |          |          |
|-----------------------------------|----------|----------|----------|----|----------|----------|----------|
| Number of imaginary frequencies=1 |          |          |          | C  | -3.22602 | -0.38577 | 2.09315  |
| Charge = 0 Multiplicity = 1       |          |          |          | C  | -1.68936 | -2.59401 | 2.83874  |
| C                                 | -3.7062  | 3.58406  | -0.34908 | H  | -0.80374 | -2.43765 | 0.87771  |
| C                                 | -3.57864 | 2.20855  | -0.54086 | C  | -3.37609 | -0.94547 | 3.36219  |
| C                                 | -2.36732 | 1.56177  | -0.26142 | H  | -3.82022 | 0.47972  | 1.81464  |
| C                                 | -1.31785 | 2.34455  | 0.22996  | C  | -2.60938 | -2.05218 | 3.73693  |
| C                                 | -1.41169 | 3.72421  | 0.43775  | H  | -1.07744 | -3.44404 | 3.12819  |
| C                                 | -2.6317  | 4.33452  | 0.12959  | H  | -4.0891  | -0.51459 | 4.06037  |
| H                                 | -4.6469  | 4.07534  | -0.58068 | H  | -2.72419 | -2.4836  | 4.72791  |
| H                                 | -4.41498 | 1.64008  | -0.93164 | C  | 2.35233  | -0.9661  | 1.01132  |
| H                                 | -2.75299 | 5.40413  | 0.26428  | C  | 2.8257   | -0.26008 | 2.12584  |
| O                                 | -0.13717 | 1.68666  | 0.51459  | C  | 2.19539  | -2.3588  | 1.10887  |
| C                                 | -0.19449 | 4.44084  | 1.03453  | C  | 3.13262  | -0.93245 | 3.31201  |
| C                                 | -0.22019 | 5.95191  | 0.75101  | H  | 2.95725  | 0.81584  | 2.07036  |
| H                                 | -1.11052 | 6.41258  | 1.18988  | C  | 2.51797  | -3.03065 | 2.28691  |
| H                                 | 0.64243  | 6.44719  | 1.20727  | H  | 1.81609  | -2.91255 | 0.25333  |
| H                                 | -0.2142  | 6.16345  | -0.32332 | C  | 2.98333  | -2.31688 | 3.39507  |
| C                                 | -0.20155 | 4.22265  | 2.57542  | H  | 3.49224  | -0.37028 | 4.16984  |
| H                                 | -0.18484 | 3.15765  | 2.82627  | H  | 2.4004   | -4.10984 | 2.3428   |
| H                                 | 0.67628  | 4.69612  | 3.03052  | H  | 3.22543  | -2.83792 | 4.31751  |
| H                                 | -1.10294 | 4.66317  | 3.017    | C  | 3.41763  | -0.46835 | -1.64921 |
| C                                 | 1.01798  | 2.38492  | 0.23997  | C  | 3.29393  | -0.2311  | -3.02984 |
| C                                 | 1.05679  | 3.76891  | 0.45443  | C  | 4.64308  | -0.91071 | -1.13128 |
| C                                 | 2.1052   | 1.65048  | -0.24821 | C  | 4.3874   | -0.43681 | -3.87134 |
| C                                 | 2.25442  | 4.42903  | 0.16631  | H  | 2.34359  | 0.10849  | -3.44001 |
| C                                 | 3.2925   | 2.35093  | -0.50981 | C  | 5.7306   | -1.12343 | -1.98319 |
| C                                 | 3.36524  | 3.72671  | -0.30297 | H  | 4.75229  | -1.09648 | -0.06715 |
| H                                 | 2.32952  | 5.50185  | 0.30837  | C  | 5.60475  | -0.88634 | -3.35263 |
| H                                 | 4.15413  | 1.82052  | -0.89843 | H  | 4.28063  | -0.25513 | -4.93719 |
| H                                 | 4.28826  | 4.25658  | -0.5197  | H  | 6.67378  | -1.47572 | -1.57329 |
| P                                 | 1.93025  | -0.15701 | -0.59506 | H  | 6.45087  | -1.05432 | -4.01402 |
| C                                 | -3.59588 | -0.74243 | -1.43432 | P  | -2.0677  | -0.24179 | -0.52291 |
| C                                 | -4.60394 | -1.53945 | -0.8741  | Pd | -0.0094  | -1.06103 | -1.68416 |
| C                                 | -3.71133 | -0.33089 | -2.77638 | C  | -1.20012 | -2.61187 | -2.80777 |
| C                                 | -5.71514 | -1.91275 | -1.63655 | H  | -1.69558 | -2.05611 | -3.59552 |
| H                                 | -4.52975 | -1.87015 | 0.15689  | H  | -1.82797 | -2.98225 | -2.003   |
| C                                 | -4.82884 | -0.69779 | -3.52627 | C  | 0.02651  | -3.23416 | -3.04066 |
| H                                 | -2.91455 | 0.25664  | -3.2316  | H  | 1.13398  | -1.91573 | -2.36382 |
| C                                 | -5.83293 | -1.48925 | -2.9602  | H  | 0.34689  | -3.9783  | -2.31307 |
| H                                 | -6.4884  | -2.53268 | -1.18991 | Cl | -0.32228 | 0.75279  | -3.73142 |
| H                                 | -4.90897 | -0.37023 | -4.55947 | C  | 0.74267  | -3.293   | -4.33461 |
| H                                 | -6.69897 | -1.77772 | -3.55035 | C  | 1.57803  | -4.39524 | -4.57993 |
| C                                 | -2.30797 | -0.92815 | 1.17863  | C  | 0.58653  | -2.31579 | -5.334   |
| C                                 | -1.53854 | -2.03306 | 1.56881  | C  | 2.22376  | -4.54063 | -5.80725 |

|                                              |              |          |          |   |          |          |          |
|----------------------------------------------|--------------|----------|----------|---|----------|----------|----------|
| H                                            | 1.71149      | -5.1494  | -3.80687 | H | 1.8185   | 5.28218  | 0.05261  |
| C                                            | 1.24203      | -2.46237 | -6.5546  | H | 3.63456  | 1.46739  | 0.72557  |
| H                                            | 0.00451      | -1.41978 | -5.13046 | H | 3.81125  | 3.93186  | 0.5683   |
| C                                            | 2.05428      | -3.57406 | -6.80016 | P | 1.38091  | -0.44048 | 0.32801  |
| H                                            | 2.85924      | -5.40419 | -5.98492 | C | -4.05497 | -1.18932 | -2.16503 |
| H                                            | 1.12288      | -1.69658 | -7.31642 | C | -5.20435 | -1.71819 | -1.56273 |
| H                                            | 2.55866      | -3.68149 | -7.75704 | C | -3.92347 | -1.25857 | -3.56519 |
| Thermal correction to Energy=                | 0.788986     |          |          | C | -6.21084 | -2.29267 | -2.34606 |
| Thermal correction to Enthalpy=              | 0.789931     |          |          | H | -5.31969 | -1.68929 | -0.48455 |
| Thermal correction to Gibbs Free Energy=     | 0.655705     |          |          | C | -4.93535 | -1.82107 | -4.34211 |
| Sum of electronic and zero-point Energies=   | -3159.820147 |          |          | H | -3.02504 | -0.8734  | -4.04175 |
| Sum of electronic and thermal Energies=      | -3159.772427 |          |          | C | -6.08162 | -2.34159 | -3.73395 |
| Sum of electronic and thermal Enthalpies=    | -3159.771483 |          |          | H | -7.09664 | -2.69954 | -1.86543 |
| Sum of electronic and thermal Free Energies= | -3159.905709 |          |          | H | -4.82309 | -1.86131 | -5.42206 |
| SCF Done: E(RM06) =                          | -3160.81922  |          |          | H | -6.86567 | -2.78764 | -4.33973 |
|                                              |              |          |          | C | -3.10188 | -0.55731 | 0.55845  |
| Int2a'                                       |              |          |          | C | -2.30415 | -1.25188 | 1.47648  |
| Number of imaginary frequencies=             | 0            |          |          | C | -4.2246  | 0.14802  | 1.02669  |
| Charge = 0 Multiplicity =                    | 1            |          |          | C | -2.62968 | -1.25984 | 2.83481  |
| C                                            | -3.70075     | 3.26897  | -2.58787 | H | -1.41357 | -1.76604 | 1.13504  |
| C                                            | -3.67851     | 1.89134  | -2.37852 | C | -4.55389 | 0.13059  | 2.38145  |
| C                                            | -2.69863     | 1.313    | -1.56416 | H | -4.83479 | 0.72122  | 0.33432  |
| C                                            | -1.75044     | 2.15908  | -0.96252 | C | -3.75751 | -0.57566 | 3.28755  |
| C                                            | -1.77894     | 3.54956  | -1.12085 | H | -1.98859 | -1.78943 | 3.53337  |
| C                                            | -2.76245     | 4.08496  | -1.96045 | H | -5.42635 | 0.67648  | 2.73061  |
| H                                            | -4.45756     | 3.70664  | -3.23222 | H | -4.0111  | -0.58099 | 4.34431  |
| H                                            | -4.42006     | 1.26444  | -2.86002 | C | 1.37136  | -0.84132 | 2.13713  |
| H                                            | -2.80901     | 5.15656  | -2.12016 | C | 1.39276  | 0.11428  | 3.16404  |
| O                                            | -0.80244     | 1.55851  | -0.16755 | C | 1.24411  | -2.19783 | 2.49219  |
| C                                            | -0.81623     | 4.40232  | -0.28919 | C | 1.29648  | -0.27388 | 4.5031   |
| C                                            | -0.5431      | 5.76573  | -0.95164 | H | 1.48587  | 1.1676   | 2.91966  |
| H                                            | -1.46991     | 6.33487  | -1.06937 | C | 1.16481  | -2.58744 | 3.82928  |
| H                                            | 0.11422      | 6.37833  | -0.3279  | H | 1.21217  | -2.95657 | 1.71279  |
| H                                            | -0.07861     | 5.64959  | -1.93626 | C | 1.18679  | -1.62319 | 4.84151  |
| C                                            | -1.47153     | 4.64713  | 1.10177  | H | 1.31355  | 0.48309  | 5.28326  |
| H                                            | -1.6873      | 3.70129  | 1.60898  | H | 1.08025  | -3.64178 | 4.08017  |
| H                                            | -0.80032     | 5.23231  | 1.74119  | H | 1.11812  | -1.92296 | 5.88392  |
| H                                            | -2.41375     | 5.19621  | 0.98902  | C | 3.09443  | -0.92336 | -0.19449 |
| C                                            | 0.40542      | 2.20572  | 0.01532  | C | 3.39932  | -0.78098 | -1.5617  |
| C                                            | 0.47453      | 3.60428  | -0.07544 | C | 4.06883  | -1.45682 | 0.66221  |
| C                                            | 1.5252       | 1.4074   | 0.30618  | C | 4.65128  | -1.15434 | -2.05004 |
| C                                            | 1.72227      | 4.20415  | 0.12113  | H | 2.65584  | -0.36996 | -2.24178 |
| C                                            | 2.7506       | 2.05896  | 0.5107   | C | 5.31809  | -1.84036 | 0.16558  |
| C                                            | 2.85295      | 3.44363  | 0.41545  | H | 3.85823  | -1.5747  | 1.7206   |

|                                                                                          |          |          |          |   |          |          |          |
|------------------------------------------------------------------------------------------|----------|----------|----------|---|----------|----------|----------|
| C                                                                                        | 5.61384  | -1.68908 | -1.18935 | H | -4.53786 | 1.38336  | -2.58282 |
| H                                                                                        | 4.87139  | -1.03245 | -3.10747 | H | -2.8807  | 5.28218  | -1.94582 |
| H                                                                                        | 6.06124  | -2.2528  | 0.84373  | O | -0.81644 | 1.69403  | -0.04249 |
| H                                                                                        | 6.58624  | -1.98655 | -1.57328 | C | -0.77346 | 4.51146  | -0.22211 |
| P                                                                                        | -2.6312  | -0.49317 | -1.22209 | C | -0.54682 | 5.88217  | -0.88414 |
| Pd                                                                                       | -0.71715 | -1.70122 | -1.99874 | H | -1.47568 | 6.4598   | -0.9093  |
| C                                                                                        | -1.48929 | -3.45729 | -1.09918 | H | 0.17055  | 6.47738  | -0.31127 |
| C                                                                                        | -1.95826 | -4.49623 | -2.12958 | H | -0.17381 | 5.78021  | -1.90855 |
| H                                                                                        | -2.69915 | -4.04304 | -2.79864 | C | -1.29351 | 4.73811  | 1.22734  |
| Cl                                                                                       | 0.08886  | 0.2179   | -3.36216 | H | -1.47094 | 3.78627  | 1.73777  |
| H                                                                                        | -1.1191  | -4.81493 | -2.75993 | H | -0.55992 | 5.3075   | 1.80994  |
| H                                                                                        | -0.67808 | -3.85044 | -0.47638 | H | -2.23638 | 5.29717  | 1.21134  |
| H                                                                                        | -2.32013 | -3.19647 | -0.44048 | C | 0.42448  | 2.29818  | -0.03073 |
| C                                                                                        | -2.56142 | -5.7125  | -1.44859 | C | 0.52092  | 3.69196  | -0.14568 |
| C                                                                                        | -1.75457 | -6.79512 | -1.06976 | C | 1.54205  | 1.46057  | 0.11118  |
| C                                                                                        | -3.93018 | -5.7668  | -1.14875 | C | 1.80154  | 4.25223  | -0.11454 |
| C                                                                                        | -2.29655 | -7.90003 | -0.41149 | C | 2.80444  | 2.07089  | 0.15712  |
| H                                                                                        | -0.69123 | -6.77376 | -1.30098 | C | 2.93382  | 3.45275  | 0.04298  |
| C                                                                                        | -4.47672 | -6.86941 | -0.4901  | H | 1.92445  | 5.32593  | -0.20724 |
| H                                                                                        | -4.57135 | -4.93783 | -1.44096 | H | 3.69112  | 1.45485  | 0.25997  |
| C                                                                                        | -3.66139 | -7.94067 | -0.11843 | H | 3.91919  | 3.90905  | 0.07116  |
| H                                                                                        | -1.65411 | -8.73159 | -0.13251 | P | 1.32518  | -0.37759 | 0.12366  |
| H                                                                                        | -5.54158 | -6.89485 | -0.27166 | C | -3.93261 | -1.1125  | -2.09006 |
| H                                                                                        | -4.0865  | -8.80151 | 0.39103  | C | -5.11114 | -1.68193 | -1.58651 |
| Thermal correction to Energy= 0.794939                                                   |          |          |          | C | -3.6802  | -1.17398 | -3.47445 |
| Thermal correction to Enthalpy= 0.795883                                                 |          |          |          | C | -6.02553 | -2.29422 | -2.44969 |
| Thermal correction to Gibbs Free Energy= 0.660677                                        |          |          |          | H | -5.32096 | -1.65057 | -0.52239 |
| Sum of electronic and zero-point Energies= -3159.852608                                  |          |          |          | C | -4.6025  | -1.77529 | -4.3309  |
| Sum of electronic and thermal Energies= -3159.805044                                     |          |          |          | H | -2.75891 | -0.75481 | -3.87321 |
| Sum of electronic and thermal Enthalpies= -3159.804100                                   |          |          |          | C | -5.77576 | -2.33946 | -3.82146 |
| Sum of electronic and thermal Free Energies= -3159.939306SCF Done: E(RM06) = -3160.84587 |          |          |          | H | -6.93462 | -2.73197 | -2.04534 |
|                                                                                          |          |          |          | H | -4.39814 | -1.80981 | -5.39764 |
|                                                                                          |          |          |          | H | -6.48809 | -2.81503 | -4.49037 |
|                                                                                          |          |          |          | C | -3.25442 | -0.50334 | 0.69951  |
| TS4a'                                                                                    |          |          |          | C | -2.57701 | -1.32282 | 1.6126   |
| Number of imaginary frequencies=1                                                        |          |          |          | C | -4.38077 | 0.21379  | 1.13884  |
| Charge = 1 Multiplicity = 1                                                              |          |          |          | C | -3.02133 | -1.43966 | 2.93181  |
| C                                                                                        | -3.80781 | 3.39271  | -2.34366 | H | -1.68032 | -1.85005 | 1.30282  |
| C                                                                                        | -3.7811  | 2.01481  | -2.12974 | C | -4.82751 | 0.09314  | 2.45441  |
| C                                                                                        | -2.76764 | 1.439    | -1.35524 | H | -4.90299 | 0.87525  | 0.45321  |
| C                                                                                        | -1.80007 | 2.29031  | -0.80342 | C | -4.14944 | -0.73591 | 3.35291  |
| C                                                                                        | -1.8144  | 3.67767  | -0.97783 | H | -2.47271 | -2.0679  | 3.62766  |
| C                                                                                        | -2.83488 | 4.21242  | -1.77241 | H | -5.70039 | 0.65253  | 2.78076  |
| H                                                                                        | -4.59122 | 3.82956  | -2.95621 | H | -4.49521 | -0.82287 | 4.37958  |

|    |          |          |          |                                                         |
|----|----------|----------|----------|---------------------------------------------------------|
| C  | 1.2253   | -0.79729 | 1.92255  | Thermal correction to Energy= 0.804321                  |
| C  | 1.18305  | 0.1626   | 2.94405  | Thermal correction to Enthalpy= 0.805265                |
| C  | 1.10913  | -2.15498 | 2.27469  | Thermal correction to Gibbs Free Energy= 0.663002       |
| C  | 1.03114  | -0.2232  | 4.27857  | Sum of electronic and zero-point Energies= -3273.146629 |
| H  | 1.27183  | 1.21637  | 2.69954  | Sum of electronic and thermal Energies= -3273.096458    |
| C  | 0.97353  | -2.54084 | 3.60786  | Sum of electronic and thermal Enthalpies= -3273.095513  |
| H  | 1.13688  | -2.91783 | 1.49965  | Sum of electronic and thermal Free Energies= -          |
| C  | 0.92958  | -1.57301 | 4.61611  | 3273.237777SCF Done: E(RM06) = -3274.12806              |
| H  | 0.99911  | 0.53633  | 5.05554  |                                                         |
| H  | 0.89942  | -3.59585 | 3.85905  | Int5a'                                                  |
| H  | 0.81815  | -1.87094 | 5.65528  | Number of imaginary frequencies=0                       |
| C  | 3.01743  | -0.94937 | -0.35751 | Charge =0 Multiplicity = 1                              |
| C  | 3.32473  | -0.93415 | -1.73056 | C -3.80396 3.40023 -2.35353                             |
| C  | 3.98573  | -1.40222 | 0.55129  | C -3.78081 2.02172 -2.14012                             |
| C  | 4.57685  | -1.35701 | -2.17676 | C -2.77207 1.44369 -1.36222                             |
| H  | 2.58342  | -0.58831 | -2.44778 | C -1.8017 2.29342 -0.80969                              |
| C  | 5.23424  | -1.83558 | 0.09725  | C -1.8131 3.67772 -0.97949                              |
| H  | 3.76908  | -1.41941 | 1.61484  | C -2.83236 4.21832 -1.77418                             |
| C  | 5.53313  | -1.81275 | -1.26571 | H -4.58656 3.84244 -2.96594                             |
| H  | 4.79978  | -1.33866 | -3.24014 | H -4.53685 1.39529 -2.59246                             |
| H  | 5.97344  | -2.18723 | 0.81271  | H -2.87469 5.28863 -1.94396                             |
| H  | 6.50472  | -2.15056 | -1.61685 | O -0.81944 1.69135 -0.04892                             |
| P  | -2.61853 | -0.36569 | -1.02896 | C -0.77515 4.51026 -0.21839                             |
| Pd | -0.50641 | -1.5181  | -1.67087 | C -0.54709 5.8827 -0.87648                              |
| C  | 0.49404  | -2.94672 | -2.33105 | H -1.47618 6.45985 -0.90366                             |
| O  | 1.24749  | -3.61354 | -2.91184 | H 0.16779 6.47708 -0.29966                              |
| C  | -0.88114 | -3.81722 | -1.15302 | H -0.17029 5.78332 -1.89975                             |
| C  | -1.6555  | -4.69512 | -2.14197 | C -1.30034 4.73334 1.22976                              |
| H  | -2.38562 | -4.08017 | -2.67842 | H -1.47889 3.78023 1.73746                              |
| Cl | -0.05938 | 0.1206   | -3.47218 | H -0.56911 5.30185 1.81617                              |
| H  | -0.96932 | -5.10973 | -2.88908 | H -2.24352 5.29182 1.2118                               |
| H  | -0.10208 | -4.3577  | -0.61199 | C 0.42063 2.29736 -0.02881                              |
| H  | -1.54935 | -3.36536 | -0.41843 | C 0.51955 3.69163 -0.1392                               |
| C  | -2.36033 | -5.82333 | -1.41153 | C 1.5388 1.46107 0.1133                                 |
| C  | -1.70289 | -7.03746 | -1.16666 | C 1.79925 4.25355 -0.10038                              |
| C  | -3.6701  | -5.66424 | -0.93673 | C 2.80007 2.06934 0.17034                               |
| C  | -2.33513 | -8.06572 | -0.46614 | C 2.93196 3.45162 0.06017                               |
| H  | -0.68944 | -7.1801  | -1.5365  | H 1.92106 5.3277 -0.18932                               |
| C  | -4.30531 | -6.69053 | -0.23587 | H 3.68703 1.45411 0.27221                               |
| H  | -4.19747 | -4.73217 | -1.12899 | H 3.91654 3.90924 0.09413                               |
| C  | -3.63928 | -7.89469 | 0.00308  | P 1.32759 -0.38108 0.12219                              |
| H  | -1.81147 | -9.00233 | -0.29222 | C -3.93397 -1.10463 -2.10631                            |
| H  | -5.32355 | -6.55187 | 0.11885  | C -5.10914 -1.68455 -1.60268                            |
| H  | -4.13466 | -8.69557 | 0.54563  | C -3.68559 -1.16087 -3.4918                             |

|    |          |          |          |                                              |                                             |          |          |
|----|----------|----------|----------|----------------------------------------------|---------------------------------------------|----------|----------|
| C  | -6.02426 | -2.29445 | -2.46681 | O                                            | 1.20447                                     | -3.61801 | -2.90273 |
| H  | -5.31947 | -1.65665 | -0.53777 | C                                            | -0.77025                                    | -3.87575 | -1.23857 |
| C  | -4.60861 | -1.75974 | -4.34911 | C                                            | -1.66541                                    | -4.72195 | -2.1545  |
| H  | -2.76672 | -0.73322 | -3.89096 | H                                            | -2.39875                                    | -4.06599 | -2.64396 |
| C  | -5.7786  | -2.33056 | -3.83955 | Cl                                           | -0.05077                                    | 0.12112  | -3.47287 |
| H  | -6.93069 | -2.73755 | -2.06234 | H                                            | -1.04336                                    | -5.16016 | -2.94769 |
| H  | -4.40732 | -1.7873  | -5.41663 | H                                            | -0.06976                                    | -4.47738 | -0.64445 |
| H  | -6.49148 | -2.80427 | -4.50918 | H                                            | -1.38165                                    | -3.28433 | -0.5305  |
| C  | -3.25488 | -0.50258 | 0.68459  | C                                            | -2.37187                                    | -5.82693 | -1.39301 |
| C  | -2.57076 | -1.31921 | 1.59846  | C                                            | -1.70912                                    | -7.03953 | -1.15482 |
| C  | -4.38539 | 0.2044   | 1.12753  | C                                            | -3.67422                                    | -5.6644  | -0.90687 |
| C  | -3.00889 | -1.43619 | 2.91853  | C                                            | -2.33266                                    | -8.06635 | -0.44619 |
| H  | -1.67087 | -1.83714 | 1.28868  | H                                            | -0.70215                                    | -7.1828  | -1.53336 |
| C  | -4.82972 | 0.08337  | 2.44385  | C                                            | -4.3045                                     | -6.69298 | -0.20158 |
| H  | -4.91271 | 0.86486  | 0.44128  | H                                            | -4.20558                                    | -4.73723 | -1.09757 |
| C  | -4.14124 | -0.73927 | 3.3395   | C                                            | -3.63326                                    | -7.89925 | 0.03058  |
| H  | -2.45501 | -2.05914 | 3.61495  | H                                            | -1.80877                                    | -9.00543 | -0.27758 |
| H  | -5.70221 | 0.63759  | 2.77386  | H                                            | -5.32004                                    | -6.55732 | 0.16192  |
| H  | -4.48518 | -0.82642 | 4.37047  | H                                            | -4.12552                                    | -8.69824 | 0.57659  |
| C  | 1.23095  | -0.7997  | 1.92452  |                                              |                                             |          |          |
| C  | 1.188    | 0.15822  | 2.9479   | Thermal correction to Energy=                | 0.807184                                    |          |          |
| C  | 1.11605  | -2.15815 | 2.27439  | Thermal correction to Enthalpy=              | 0.808128                                    |          |          |
| C  | 1.03685  | -0.23013 | 4.28177  | Thermal correction to Gibbs Free Energy=     | 0.668800                                    |          |          |
| H  | 1.27567  | 1.21253  | 2.70162  | Sum of electronic and zero-point Energies=   | -3273.195006                                |          |          |
| C  | 0.98108  | -2.54658 | 3.6069   | Sum of electronic and thermal Energies=      | -3273.145363                                |          |          |
| H  | 1.14425  | -2.9196  | 1.49797  | Sum of electronic and thermal Enthalpies=    | -3273.144419                                |          |          |
| C  | 0.93657  | -1.58066 | 4.61695  | Sum of electronic and thermal Free Energies= | -3273.2837475CF Done: E(RM06) = -3274.18088 |          |          |
| H  | 1.00443  | 0.52796  | 5.06014  |                                              |                                             |          |          |
| H  | 0.90792  | -3.60212 | 3.85617  | TS6a'                                        |                                             |          |          |
| H  | 0.82573  | -1.88057 | 5.65561  | Number of imaginary frequencies=             | 1                                           |          |          |
| C  | 3.02024  | -0.95029 | -0.3577  | Charge =                                     | 0 Multiplicity =                            | 1        |          |
| C  | 3.32219  | -0.93292 | -1.73113 | C                                            | -4.44972                                    | 2.73225  | -1.199   |
| C  | 3.98988  | -1.40088 | 0.54898  | C                                            | -4.12705                                    | 1.38694  | -1.05362 |
| C  | 4.5775   | -1.35122 | -2.17967 | C                                            | -2.85464                                    | 0.98735  | -0.6169  |
| H  | 2.58002  | -0.59317 | -2.45055 | C                                            | -1.9221                                     | 1.99889  | -0.31522 |
| C  | 5.23787  | -1.83336 | 0.09265  | C                                            | -2.23046                                    | 3.3629   | -0.43874 |
| H  | 3.77458  | -1.42    | 1.61278  | C                                            | -3.50354                                    | 3.71008  | -0.89757 |
| C  | 5.53505  | -1.80833 | -1.27064 | H                                            | -5.43649                                    | 3.0189   | -1.55079 |
| H  | 4.79912  | -1.33467 | -3.24331 | H                                            | -4.86435                                    | 0.63204  | -1.30363 |
| H  | 5.97804  | -2.18606 | 0.80661  | H                                            | -3.76838                                    | 4.75484  | -1.01717 |
| H  | 6.50622  | -2.14544 | -1.62357 | O                                            | -0.66716                                    | 1.6347   | 0.13544  |
| P  | -2.62185 | -0.35476 | -1.0408  | C                                            | -1.17457                                    | 4.38329  | 0.00029  |
| Pd | -0.51052 | -1.50378 | -1.6884  | C                                            | -1.41777                                    | 5.77021  | -0.61846 |
| C  | 0.39534  | -3.0454  | -2.25529 | H                                            | -2.38781                                    | 6.16958  | -0.30753 |

|   |          |          |          |    |                                 |          |          |
|---|----------|----------|----------|----|---------------------------------|----------|----------|
| H | -0.66486 | 6.48457  | -0.27214 | H  | 0.71828                         | -1.21204 | 2.31309  |
| H | -1.3892  | 5.73853  | -1.71265 | C  | 2.92022                         | 0.24182  | 4.45662  |
| C | -1.2381  | 4.51811  | 1.55017  | H  | 4.53367                         | 1.55534  | 3.87586  |
| H | -1.0714  | 3.55437  | 2.04066  | H  | 1.23093                         | -1.07214 | 4.71948  |
| H | -0.47061 | 5.217    | 1.90232  | H  | 3.14578                         | 0.30183  | 5.51822  |
| H | -2.22061 | 4.89486  | 1.85787  | C  | 3.44999                         | -0.40348 | -0.97102 |
| C | 0.39903  | 2.43985  | -0.22912 | C  | 3.4513                          | -0.29549 | -2.37514 |
| C | 0.19842  | 3.81804  | -0.37617 | C  | 4.56872                         | -0.95322 | -0.32669 |
| C | 1.65413  | 1.83589  | -0.42073 | C  | 4.56559                         | -0.70275 | -3.10711 |
| C | 1.28411  | 4.59688  | -0.78814 | H  | 2.57254                         | 0.09093  | -2.88643 |
| C | 2.71775  | 2.65574  | -0.81986 | C  | 5.67747                         | -1.36911 | -1.06973 |
| C | 2.53311  | 4.02229  | -1.01618 | H  | 4.58169                         | -1.05806 | 0.75328  |
| H | 1.16083  | 5.66491  | -0.93008 | C  | 5.68183                         | -1.23939 | -2.45829 |
| H | 3.69238  | 2.21501  | -1.00154 | H  | 4.55676                         | -0.60765 | -4.18967 |
| H | 3.36481  | 4.64089  | -1.34089 | H  | 6.53739                         | -1.79232 | -0.55703 |
| P | 1.89715  | 0.03555  | -0.08323 | H  | 6.54619                         | -1.56039 | -3.03369 |
| C | -3.62436 | -1.59355 | -1.70799 | P  | -2.46436                        | -0.82046 | -0.49916 |
| C | -4.8711  | -2.12667 | -1.34604 | Pd | -0.11266                        | -1.05412 | -0.85765 |
| C | -3.22296 | -1.6336  | -3.0545  | C  | 1.12844                         | -2.62011 | -1.0951  |
| C | -5.7027  | -2.69275 | -2.31512 | H  | 0.65306                         | -3.06711 | -3.1348  |
| H | -5.19375 | -2.10651 | -0.31007 | Cl | 0.33973                         | -2.02493 | -4.45709 |
| C | -4.06356 | -2.19178 | -4.01765 | N  | 0.80815                         | -3.66297 | -2.0384  |
| H | -2.26189 | -1.21281 | -3.34133 | H  | -0.03682                        | -4.1264  | -1.77144 |
| C | -5.30171 | -2.72544 | -3.65154 | H  | 1.56081                         | -4.31832 | -2.10173 |
| H | -6.6643  | -3.10637 | -2.0223  | O  | 2.38564                         | -2.79945 | -0.81105 |
| H | -3.74616 | -2.21126 | -5.05691 | C  | 0.60141                         | -3.32678 | 0.16762  |
| H | -5.95112 | -3.16517 | -4.4042  | H  | 0.78714                         | -2.71256 | 1.02386  |
| C | -3.53267 | -0.89948 | 0.99899  | H  | -0.45096                        | -3.49373 | 0.06994  |
| C | -3.88182 | -2.15604 | 1.52374  | C  | 1.32171                         | -4.67716 | 0.33858  |
| C | -3.96574 | 0.25575  | 1.66697  | H  | 2.35373                         | -4.50506 | 0.56267  |
| C | -4.66404 | -2.25015 | 2.6737   | H  | 1.24266                         | -5.24079 | -0.5675  |
| H | -3.54685 | -3.06579 | 1.0347   | C  | 0.67045                         | -5.46405 | 1.49108  |
| C | -4.73744 | 0.15737  | 2.82662  | C  | -0.3911                         | -6.33124 | 1.23117  |
| H | -3.70769 | 1.23571  | 1.27958  | C  | 1.14189                         | -5.30991 | 2.79475  |
| C | -5.09234 | -1.09413 | 3.33057  | C  | -0.98147                        | -7.04359 | 2.27485  |
| H | -4.92962 | -3.22973 | 3.06179  | H  | -0.76304                        | -6.45196 | 0.2034   |
| H | -5.06545 | 1.06272  | 3.33065  | C  | 0.55209                         | -6.02314 | 3.83871  |
| H | -5.6963  | -1.16957 | 4.23096  | H  | 1.97866                         | -4.6266  | 2.99975  |
| C | 2.34012  | 0.08412  | 1.71216  | C  | -0.50952                        | -6.88978 | 3.57901  |
| C | 3.41052  | 0.87221  | 2.17385  | H  | -1.81861                        | -7.72666 | 2.07016  |
| C | 1.55518  | -0.60884 | 2.64416  | H  | 0.92428                         | -5.90171 | 4.86643  |
| C | 3.70184  | 0.9447   | 3.53448  | H  | -0.97512                        | -7.45159 | 4.40174  |
| H | 4.01401  | 1.43725  | 1.46975  |    |                                 |          |          |
| C | 1.84814  | -0.52843 | 4.00941  |    |                                 |          |          |
|   |          |          |          |    | Thermal correction to Energy=   | 0.843529 |          |
|   |          |          |          |    | Thermal correction to Enthalpy= | 0.844473 |          |

|                                                           |          |          |          |    |          |          |          |
|-----------------------------------------------------------|----------|----------|----------|----|----------|----------|----------|
| Thermal correction to Gibbs Free Energy= 0.703702         |          |          |          | C  | -5.16118 | 0.15197  | -3.0556  |
| Sum of electronic and zero-point Energies= -3329.698200   |          |          |          | H  | -3.15974 | 0.9095   | -2.86649 |
| Sum of electronic and thermal Energies= -3329.647355      |          |          |          | C  | -6.20531 | -0.54137 | -2.43501 |
| Sum of electronic and thermal Enthalpies= -3329.646411    |          |          |          | H  | -6.85286 | -1.54573 | -0.64105 |
| Sum of electronic and thermal Free Energies= -3329.787182 |          |          |          | H  | -5.28254 | 0.53137  | -4.06628 |
| SCF Done: E(RM06) = -3330.71575794                        |          |          |          | H  | -7.13975 | -0.70576 | -2.96361 |
|                                                           |          |          |          | C  | -2.35413 | -0.55835 | 1.43512  |
| TS1b'                                                     |          |          |          | C  | -2.23847 | -1.95442 | 1.54452  |
| Number of imaginary frequencies=1                         |          |          |          | C  | -2.63221 | 0.19698  | 2.58309  |
| Charge = 0 Multiplicity = 1                               |          |          |          | C  | -2.41841 | -2.58164 | 2.77708  |
| C                                                         | -3.51582 | 4.12258  | 0.08972  | H  | -2.02331 | -2.55513 | 0.66524  |
| C                                                         | -3.49315 | 2.73777  | -0.06088 | C  | -2.7941  | -0.43402 | 3.81836  |
| C                                                         | -2.28677 | 2.02873  | 0.05851  | H  | -2.72746 | 1.27586  | 2.51684  |
| C                                                         | -1.13751 | 2.76467  | 0.37427  | C  | -2.69246 | -1.82229 | 3.91739  |
| C                                                         | -1.12131 | 4.15752  | 0.51619  | H  | -2.34191 | -3.66326 | 2.84557  |
| C                                                         | -2.34009 | 4.82482  | 0.35987  | H  | -3.0066  | 0.16186  | 4.70144  |
| H                                                         | -4.45408 | 4.65956  | -0.01037 | H  | -2.82726 | -2.31096 | 4.87818  |
| H                                                         | -4.41219 | 2.21016  | -0.28696 | C  | 1.84918  | -0.5994  | 1.29576  |
| H                                                         | -2.38274 | 5.90379  | 0.4591   | C  | 2.42199  | 0.15418  | 2.33152  |
| O                                                         | 0.02295  | 2.04198  | 0.5498   | C  | 1.34151  | -1.87745 | 1.57437  |
| C                                                         | 0.20149  | 4.83903  | 0.89578  | C  | 2.48581  | -0.36697 | 3.62483  |
| C                                                         | 0.22891  | 6.31715  | 0.46806  | H  | 2.824    | 1.14222  | 2.13075  |
| H                                                         | -0.56961 | 6.87959  | 0.96008  | C  | 1.41589  | -2.39739 | 2.86627  |
| H                                                         | 1.16783  | 6.78991  | 0.77032  | H  | 0.88812  | -2.46665 | 0.78146  |
| H                                                         | 0.1163   | 6.43055  | -0.61519 | C  | 1.986    | -1.64256 | 3.89353  |
| C                                                         | 0.36863  | 4.75981  | 2.44128  | H  | 2.93008  | 0.22399  | 4.42067  |
| H                                                         | 0.35604  | 3.72284  | 2.7915   | H  | 1.02161  | -3.38818 | 3.07172  |
| H                                                         | 1.31961  | 5.21237  | 2.74338  | H  | 2.03937  | -2.04656 | 4.90041  |
| H                                                         | -0.4452  | 5.29878  | 2.93875  | C  | 3.352    | -0.69398 | -1.19201 |
| C                                                         | 1.19042  | 2.65175  | 0.14659  | C  | 3.54633  | -0.5915  | -2.57991 |
| C                                                         | 1.33817  | 4.0373   | 0.24817  | C  | 4.35145  | -1.28832 | -0.40848 |
| C                                                         | 2.18456  | 1.79888  | -0.3467  | C  | 4.71438  | -1.07145 | -3.17041 |
| C                                                         | 2.55407  | 4.5749   | -0.18976 | H  | 2.78693  | -0.12577 | -3.20354 |
| C                                                         | 3.39621  | 2.3733   | -0.75651 | C  | 5.51533  | -1.78138 | -1.00531 |
| C                                                         | 3.57143  | 3.75476  | -0.68235 | H  | 4.22673  | -1.37292 | 0.66552  |
| H                                                         | 2.72076  | 5.64536  | -0.14044 | C  | 5.70015  | -1.67396 | -2.38328 |
| H                                                         | 4.19327  | 1.74631  | -1.13937 | H  | 4.85308  | -0.97924 | -4.24386 |
| H                                                         | 4.50857  | 4.19616  | -1.00717 | H  | 6.27653  | -2.24894 | -0.38738 |
| P                                                         | 1.81513  | 0.00257  | -0.43822 | H  | 6.60577  | -2.05746 | -2.8442  |
| C                                                         | -3.78677 | -0.11573 | -1.06354 | P  | -2.16677 | 0.20538  | -0.22838 |
| C                                                         | -4.84183 | -0.80178 | -0.44749 | Pd | -0.19735 | -0.68044 | -1.56728 |
| C                                                         | -3.96099 | 0.3594   | -2.37689 | C  | -1.54657 | -2.12555 | -2.86863 |
| C                                                         | -6.04289 | -1.01438 | -1.13292 | H  | -2.43491 | -1.51544 | -2.99928 |
| H                                                         | -4.7342  | -1.1695  | 0.56731  | C  | -0.43564 | -1.8208  | -3.64939 |



|                                                           |          |          |          |   |          |          |          |
|-----------------------------------------------------------|----------|----------|----------|---|----------|----------|----------|
| H                                                         | 0.9112   | -1.18221 | -2.57077 | H | -0.25487 | 5.51271  | 1.54711  |
| H                                                         | 0.31796  | -2.5728  | -3.86418 | H | -2.01422 | 5.23853  | 1.53974  |
| C                                                         | -1.72933 | -3.38369 | -2.12612 | C | 0.50274  | 2.48401  | -0.32571 |
| C                                                         | -3.03291 | -3.78527 | -1.77912 | C | 0.35908  | 3.85501  | -0.56527 |
| C                                                         | -0.64965 | -4.21734 | -1.77019 | C | 1.73026  | 1.81814  | -0.43904 |
| C                                                         | -3.25206 | -4.98707 | -1.10722 | C | 1.49046  | 4.5557   | -0.99312 |
| H                                                         | -3.87582 | -3.15593 | -2.04962 | C | 2.84466  | 2.55858  | -0.85487 |
| C                                                         | -0.87191 | -5.4136  | -1.09301 | C | 2.72278  | 3.91503  | -1.14227 |
| H                                                         | 0.36709  | -3.92665 | -2.01918 | H | 1.42161  | 5.61746  | -1.20375 |
| C                                                         | -2.17349 | -5.80365 | -0.7601  | H | 3.80527  | 2.06808  | -0.96474 |
| H                                                         | -4.26564 | -5.28762 | -0.85814 | H | 3.58768  | 4.48115  | -1.47298 |
| H                                                         | -0.02975 | -6.04669 | -0.82853 | P | 1.80493  | 0.0324   | -0.01997 |
| H                                                         | -2.3442  | -6.74077 | -0.23821 | C | -3.58593 | -1.46571 | -1.48778 |
| H                                                         | -0.48041 | -0.98851 | -4.34546 | C | -4.73693 | -2.10015 | -0.9965  |
| Cl                                                        | -0.4437  | 1.31372  | -2.62347 | C | -3.35216 | -1.45641 | -2.87629 |
| Thermal correction to Energy= 0.789636                    |          |          |          | C | -5.6353  | -2.71836 | -1.87335 |
| Thermal correction to Enthalpy= 0.790581                  |          |          |          | H | -4.93302 | -2.11893 | 0.0711   |
| Thermal correction to Gibbs Free Energy= 0.655863         |          |          |          | C | -4.25799 | -2.06597 | -3.74726 |
| Sum of electronic and zero-point Energies= -3159.820701   |          |          |          | H | -2.45647 | -0.98162 | -3.26665 |
| Sum of electronic and thermal Energies= -3159.772895      |          |          |          | C | -5.39922 | -2.70055 | -3.24905 |
| Sum of electronic and thermal Enthalpies= -3159.771951    |          |          |          | H | -6.52227 | -3.20749 | -1.47823 |
| Sum of electronic and thermal Free Energies= -3159.906669 |          |          |          | H | -4.06539 | -2.04967 | -4.81677 |
| SCF Done: E(RM06) = -3160.823429                          |          |          |          | H | -6.09549 | -3.18034 | -3.92893 |
|                                                           |          |          |          | C | -2.82629 | -1.11678 | 1.2932   |
| Int2b'                                                    |          |          |          | C | -2.57141 | -2.43008 | 1.7303   |
| Number of imaginary frequencies=0                         |          |          |          | C | -3.39249 | -0.20831 | 2.19742  |
| Charge =0 Multiplicity = 1                                |          |          |          | C | -2.8885  | -2.8246  | 3.02921  |
| C                                                         | -4.35299 | 2.85729  | -1.21564 | H | -2.13115 | -3.15242 | 1.04557  |
| C                                                         | -4.05757 | 1.51369  | -1.00028 | C | -3.69719 | -0.60011 | 3.50375  |
| C                                                         | -2.77874 | 1.11384  | -0.58089 | H | -3.60104 | 0.80913  | 1.88467  |
| C                                                         | -1.82518 | 2.12181  | -0.37155 | C | -3.44901 | -1.90745 | 3.92309  |
| C                                                         | -2.09064 | 3.48261  | -0.58054 | H | -2.69689 | -3.84665 | 3.34109  |
| C                                                         | -3.37333 | 3.82946  | -1.01534 | H | -4.13447 | 0.11927  | 4.19441  |
| H                                                         | -5.34579 | 3.14846  | -1.54675 | H | -3.69062 | -2.21166 | 4.93816  |
| H                                                         | -4.81834 | 0.76178  | -1.17692 | C | 1.7342   | 0.06118  | 1.82589  |
| H                                                         | -3.61947 | 4.87011  | -1.19936 | C | 2.40537  | 1.05193  | 2.56289  |
| O                                                         | -0.57841 | 1.72416  | 0.06906  | C | 0.97421  | -0.89533 | 2.51112  |
| C                                                         | -0.99617 | 4.50218  | -0.25445 | C | 2.33234  | 1.06661  | 3.95525  |
| C                                                         | -1.19025 | 5.82105  | -1.02384 | H | 2.98165  | 1.81676  | 2.04694  |
| H                                                         | -2.14511 | 6.28662  | -0.7626  | C | 0.8999   | -0.87507 | 3.9052   |
| H                                                         | -0.41262 | 6.54358  | -0.75852 | H | 0.42335  | -1.64592 | 1.96091  |
| H                                                         | -1.16471 | 5.66542  | -2.10739 | C | 1.57921  | 0.10387  | 4.62898  |
| C                                                         | -1.04514 | 4.80456  | 1.27167  | H | 2.85795  | 1.83884  | 4.51355  |
| H                                                         | -0.9066  | 3.89285  | 1.86124  | H | 0.2932   | -1.61824 | 4.41803  |

|                                              |              |          |          |                                   |                  |          |          |          |
|----------------------------------------------|--------------|----------|----------|-----------------------------------|------------------|----------|----------|----------|
| H                                            | 1.51745      | 0.12127  | 5.71661  | TS4b'                             |                  |          |          |          |
| C                                            | 3.53532      | -0.44366 | -0.4472  | Number of imaginary frequencies=1 |                  |          |          |          |
| C                                            | 3.83878      | -0.60867 | -1.81289 | Charge =0                         | Multiplicity = 1 |          |          |          |
| C                                            | 4.52969      | -0.69309 | 0.50806  | C                                 | -4.37283         | 2.83295  | -1.19354 |          |
| C                                            | 5.11915      | -0.99365 | -2.20717 | C                                 | -4.07359         | 1.48987  | -0.98121 |          |
| H                                            | 3.06509      | -0.437   | -2.5584  | C                                 | -2.79078         | 1.09155  | -0.57524 |          |
| C                                            | 5.80732      | -1.09595 | 0.10578  | C                                 | -1.83687         | 2.10059  | -0.36955 |          |
| H                                            | 4.31177      | -0.58284 | 1.56522  | C                                 | -2.10647         | 3.46121  | -0.57588 |          |
| C                                            | 6.10713      | -1.24157 | -1.2491  | C                                 | -3.39292         | 3.80629  | -1.00057 |          |
| H                                            | 5.34234      | -1.10935 | -3.26443 | H                                 | -5.3687          | 3.12277  | -1.51644 |          |
| H                                            | 6.5684       | -1.29019 | 0.85912  | H                                 | -4.83471         | 0.73699  | -1.15483 |          |
| H                                            | 7.10162      | -1.55152 | -1.55617 | H                                 | -3.64198         | 4.84668  | -1.17908 |          |
| P                                            | -2.29751     | -0.6681  | -0.42335 | O                                 | -0.58666         | 1.70497  | 0.06214  |          |
| Pd                                           | 0.37382      | -1.55779 | -1.1475  | C                                 | -1.00951         | 4.48333  | -0.2567  |          |
| C                                            | 0.86181      | -3.10038 | -0.20708 | C                                 | -1.21052         | 5.80107  | -1.02643 |          |
| O                                            | 1.28932      | -3.95078 | 0.45019  | H                                 | -2.16498         | 6.26489  | -0.76075 |          |
| C                                            | -0.0801      | -3.73823 | -2.34289 | H                                 | -0.43319         | 6.52558  | -0.76579 |          |
| C                                            | 1.21161      | -3.93921 | -3.10966 | H                                 | -1.19016         | 5.64438  | -2.10993 |          |
| H                                            | 1.5324       | -2.99794 | -3.56121 | C                                 | -1.05395         | 4.78715  | 1.26937  |          |
| Cl                                           | 0.20807      | -0.18341 | -3.20995 | H                                 | -0.91051         | 3.87632  | 1.85914  |          |
| H                                            | 2.03159      | -4.32107 | -2.49034 | H                                 | -0.26353         | 5.497    | 1.53996  |          |
| H                                            | -0.79137     | -3.09552 | -2.86043 | H                                 | -2.02243         | 5.22249  | 1.5421   |          |
| H                                            | 1.04669      | -4.67151 | -3.91879 | C                                 | 0.4907           | 2.46545  | -0.33616 |          |
| C                                            | -0.73255     | -4.9178  | -1.72735 | C                                 | 0.34273          | 3.83635  | -0.57379 |          |
| C                                            | -0.02923     | -6.10089 | -1.41079 | C                                 | 1.7197           | 1.80042  | -0.45706 |          |
| C                                            | -2.12611     | -4.90932 | -1.50195 | C                                 | 1.4737           | 4.54058  | -1.00157 |          |
| C                                            | -0.69407     | -7.22145 | -0.91066 | C                                 | 2.83092          | 2.54445  | -0.87193 |          |
| H                                            | 1.04216      | -6.15226 | -1.56909 | C                                 | 2.70446          | 3.90365  | -1.15492 |          |
| C                                            | -2.7855      | -6.02551 | -0.99427 | H                                 | 1.40128          | 5.60238  | -1.21075 |          |
| H                                            | -2.69194     | -4.01418 | -1.74266 | H                                 | 3.79264          | 2.05696  | -0.98547 |          |
| C                                            | -2.07271     | -7.19269 | -0.69772 | H                                 | 3.56972          | 4.4696   | -1.4876  |          |
| H                                            | -0.12678     | -8.12113 | -0.68514 | P                                 | 1.80758          | 0.01366  | -0.02584 |          |
| H                                            | -3.86207     | -5.98594 | -0.84435 | C                                 | -3.60316         | -1.48235 | -1.48378 |          |
| H                                            |              | -2.58837 | -8.06605 | -0.3106                           | C                | -4.74548 | -2.13291 | -0.99437 |
| Thermal correction to Energy=                | 0.805017     |          |          | C                                 | -3.37921         | -1.44869 | -2.87361 |          |
| Thermal correction to Enthalpy=              | 0.805961     |          |          | C                                 | -5.64607         | -2.74002 | -1.8747  |          |
| Thermal correction to Gibbs Free Energy=     | 0.663378     |          |          | H                                 | -4.93359         | -2.17093 | 0.07408  |          |
| Sum of electronic and zero-point Energies=   | -3273.173716 |          |          | C                                 | -4.28721         | -2.0473  | -3.74775 |          |
| Sum of electronic and thermal Energies=      | -3273.122887 |          |          | H                                 | -2.48849         | -0.96063 | -3.26525 |          |
| Sum of electronic and thermal Enthalpies=    | -3273.121942 |          |          | C                                 | -5.42058         | -2.69781 | -3.25162 |          |
| Sum of electronic and thermal Free Energies= | -3273.264525 |          |          | H                                 | -6.52671         | -3.24157 | -1.48102 |          |
| SCF Done: E(RM06) =                          | -3160.852904 |          |          | H                                 | -4.10241         | -2.01249 | -4.81818 |          |
|                                              |              |          |          | H                                 | -6.12176         | -3.17077 | -3.93423 |          |
|                                              |              |          |          | C                                 | -2.83729         | -1.13729 | 1.30008  |          |

|    |          |          |          |                                                           |          |          |          |
|----|----------|----------|----------|-----------------------------------------------------------|----------|----------|----------|
| C  | -2.59022 | -2.45283 | 1.73497  | C                                                         | -0.03438 | -6.09263 | -1.23487 |
| C  | -3.39524 | -0.22509 | 2.20756  | C                                                         | -2.0781  | -4.8745  | -1.6303  |
| C  | -2.90601 | -2.84552 | 3.0355   | C                                                         | -0.77654 | -7.20887 | -0.85119 |
| H  | -2.15697 | -3.17843 | 1.05035  | H                                                         | 1.0494   | -6.14678 | -1.22208 |
| C  | -3.69608 | -0.61539 | 3.51518  | C                                                         | -2.81998 | -5.98944 | -1.24085 |
| H  | -3.59775 | 0.79406  | 1.89363  | H                                                         | -2.59307 | -3.97538 | -1.95296 |
| C  | -3.45493 | -1.92465 | 3.93269  | C                                                         | -2.17264 | -7.16269 | -0.84802 |
| H  | -2.71711 | -3.86901 | 3.34877  | H                                                         | -0.26113 | -8.11812 | -0.55237 |
| H  | -4.12462 | 0.10679  | 4.20548  | H                                                         | -3.9055  | -5.93888 | -1.25462 |
| H  | -3.69321 | -2.22753 | 4.94894  | H                                                         | -2.7489  | -8.03398 | -0.54805 |
| C  | 1.76243  | 0.05897  | 1.81741  | Thermal correction to Energy= 0.804087                    |          |          |          |
| C  | 2.48501  | 1.02585  | 2.53869  | Thermal correction to Enthalpy= 0.805031                  |          |          |          |
| C  | 0.96969  | -0.8591  | 2.51837  | Thermal correction to Gibbs Free Energy= 0.664348         |          |          |          |
| C  | 2.42745  | 1.05659  | 3.93151  | Sum of electronic and zero-point Energies= -3273.159267   |          |          |          |
| H  | 3.08619  | 1.76022  | 2.01019  | Sum of electronic and thermal Energies= -3273.109034      |          |          |          |
| C  | 0.90751  | -0.82197 | 3.91323  | Sum of electronic and thermal Enthalpies= -3273.108090    |          |          |          |
| H  | 0.38728  | -1.59425 | 1.97486  | Sum of electronic and thermal Free Energies= -3273.248773 |          |          |          |
| C  | 1.63812  | 0.1319   | 4.6214   | SCF Done: E(RM06) = -3274.140596                          |          |          |          |
| H  | 2.99243  | 1.80738  | 4.47773  |                                                           |          |          |          |
| H  | 0.27665  | -1.53323 | 4.43864  | Int5b'                                                    |          |          |          |
| H  | 1.58824  | 0.16249  | 5.70667  | Number of imaginary frequencies=0                         |          |          |          |
| C  | 3.53032  | -0.45613 | -0.48337 | Charge =0 Multiplicity = 1                                |          |          |          |
| C  | 3.8221   | -0.57435 | -1.85574 | C                                                         | -4.35299 | 2.85039  | -1.21564 |
| C  | 4.52409  | -0.75824 | 0.45713  | C                                                         | -4.05757 | 1.50679  | -1.00028 |
| C  | 5.09382  | -0.9669  | -2.26985 | C                                                         | -2.77874 | 1.10694  | -0.58779 |
| H  | 3.04863  | -0.36413 | -2.59163 | C                                                         | -1.82518 | 2.11491  | -0.37155 |
| C  | 5.79284  | -1.16548 | 0.03415  | C                                                         | -2.09064 | 3.47571  | -0.58054 |
| H  | 4.31297  | -0.68348 | 1.51873  | C                                                         | -3.37333 | 3.82256  | -1.01534 |
| C  | 6.08166  | -1.26642 | -1.32641 | H                                                         | -5.34579 | 3.14156  | -1.54675 |
| H  | 5.3102   | -1.04811 | -3.33174 | H                                                         | -4.81834 | 0.75488  | -1.18382 |
| H  | 6.5534   | -1.40299 | 0.77333  | H                                                         | -3.61947 | 4.86321  | -1.19246 |
| H  | 7.06933  | -1.58171 | -1.65236 | O                                                         | -0.57841 | 1.71726  | 0.06906  |
| P  | -2.31334 | -0.69167 | -0.41676 | C                                                         | -0.98927 | 4.49528  | -0.25445 |
| Pd | 0.34689  | -1.5265  | -1.12366 | C                                                         | -1.18335 | 5.81415  | -1.02384 |
| C  | 0.78846  | -3.12742 | -0.27526 | H                                                         | -2.13821 | 6.27972  | -0.7626  |
| O  | 1.23243  | -3.87897 | 0.49981  | H                                                         | -0.40572 | 6.53668  | -0.75852 |
| C  | 0.10496  | -3.70149 | -2.07523 | H                                                         | -1.15781 | 5.65852  | -2.10739 |
| C  | 1.38602  | -3.95607 | -2.86686 | C                                                         | -1.04514 | 4.79766  | 1.27167  |
| H  | 1.77139  | -3.01792 | -3.27258 | H                                                         | -0.9066  | 3.88595  | 1.86124  |
| Cl | 0.1798   | -0.17811 | -3.21947 | H                                                         | -0.25487 | 5.50581  | 1.54711  |
| H  | 2.17385  | -4.41821 | -2.26309 | H                                                         | -2.01422 | 5.23853  | 1.53974  |
| H  | -0.55849 | -3.03363 | -2.63039 | C                                                         | 0.50274  | 2.47021  | -0.32571 |
| H  | 1.1686   | -4.6315  | -3.70565 | C                                                         | 0.35908  | 3.84121  | -0.56527 |
| C  | -0.67262 | -4.90407 | -1.63244 | C                                                         | 1.73026  | 1.79744  | -0.44594 |

|   |          |          |          |                                                           |          |          |          |
|---|----------|----------|----------|-----------------------------------------------------------|----------|----------|----------|
| C | 1.49736  | 4.5419   | -0.98622 | H                                                         | 3.072    | -0.437   | -2.5584  |
| C | 2.84466  | 2.53788  | -0.85487 | C                                                         | 5.82112  | -1.09595 | 0.10578  |
| C | 2.72278  | 3.90123  | -1.13537 | H                                                         | 4.32557  | -0.58974 | 1.56522  |
| H | 1.42851  | 5.60366  | -1.19685 | C                                                         | 6.11403  | -1.24157 | -1.2491  |
| H | 3.80527  | 2.04739  | -0.96474 | H                                                         | 5.34924  | -1.10935 | -3.26443 |
| H | 3.59458  | 4.46045  | -1.46608 | H                                                         | 6.5822   | -1.29709 | 0.85222  |
| P | 1.81873  | 0.0048   | -0.01307 | H                                                         | 7.10852  | -1.55152 | -1.56307 |
| C | -3.58593 | -1.47261 | -1.48778 | P                                                         | -2.29751 | -0.675   | -0.42335 |
| C | -4.73693 | -2.10705 | -0.9965  | Pd                                                        | 0.36002  | -1.46809 | -1.1406  |
| C | -3.35216 | -1.46331 | -2.87629 | C                                                         | 0.75831  | -3.18318 | -0.47618 |
| C | -5.6353  | -2.71836 | -1.87335 | O                                                         | 1.24102  | -3.90938 | 0.31909  |
| H | -4.93302 | -2.12583 | 0.0711   | C                                                         | 0.051    | -3.80033 | -2.12209 |
| C | -4.25799 | -2.06597 | -3.74726 | C                                                         | 1.25991  | -4.00131 | -3.03376 |
| H | -2.45647 | -0.98162 | -3.27355 | H                                                         | 1.5876   | -3.03934 | -3.43701 |
| C | -5.39922 | -2.70055 | -3.24905 | Cl                                                        | 0.20117  | -0.12821 | -3.23755 |
| H | -6.52227 | -3.20749 | -1.47823 | H                                                         | 2.10749  | -4.47287 | -2.51794 |
| H | -4.06539 | -2.04967 | -4.81677 | H                                                         | -0.63957 | -3.06792 | -2.54993 |
| H | -6.1024  | -3.18034 | -3.92893 | H                                                         | 0.97769  | -4.65081 | -3.87739 |
| C | -2.81939 | -1.11678 | 1.2932   | C                                                         | -0.69805 | -5.0006  | -1.65835 |
| C | -2.56451 | -2.43008 | 1.7303   | C                                                         | -0.02923 | -6.19749 | -1.36249 |
| C | -3.39249 | -0.20831 | 2.19742  | C                                                         | -2.09161 | -4.94382 | -1.48125 |
| C | -2.8885  | -2.8246  | 3.02921  | C                                                         | -0.72857 | -7.30425 | -0.88996 |
| H | -2.11735 | -3.15242 | 1.05247  | H                                                         | 1.04906  | -6.25576 | -1.48629 |
| C | -3.69719 | -0.60011 | 3.50375  | C                                                         | -2.7924  | -6.05311 | -1.00807 |
| H | -3.60104 | 0.80913  | 1.87777  | H                                                         | -2.62984 | -4.03488 | -1.72886 |
| C | -3.44901 | -1.90745 | 3.92309  | C                                                         | -2.11411 | -7.23409 | -0.70462 |
| H | -2.68999 | -3.84665 | 3.34799  | H                                                         | -0.19578 | -8.22463 | -0.66444 |
| H | -4.13447 | 0.11927  | 4.18751  | H                                                         | -3.86897 | -5.99284 | -0.87885 |
| H | -3.69062 | -2.21166 | 4.93816  | H                                                         | -2.65737 | -8.10055 | -0.3313  |
| C | 1.7411   | 0.04738  | 1.82589  | Thermal correction to Energy= 0.807052                    |          |          |          |
| C | 2.40537  | 1.04503  | 2.56289  | Thermal correction to Enthalpy= 0.807996                  |          |          |          |
| C | 0.98801  | -0.91603 | 2.51112  | Thermal correction to Gibbs Free Energy= 0.669418         |          |          |          |
| C | 2.32544  | 1.06661  | 3.95525  | Sum of electronic and zero-point Energies= -3273.189118   |          |          |          |
| H | 2.97475  | 1.80986  | 2.04694  | Sum of electronic and thermal Energies= -3273.139469      |          |          |          |
| C | 0.8999   | -0.88887 | 3.9052   | Sum of electronic and thermal Enthalpies= -3273.138525    |          |          |          |
| H | 0.45785  | -1.68042 | 1.94711  | Sum of electronic and thermal Free Energies= -3273.277103 |          |          |          |
| C | 1.57231  | 0.09697  | 4.62898  | SCF Done: E(RM06) = -3274.173117                          |          |          |          |
| H | 2.84415  | 1.83884  | 4.51355  |                                                           |          |          |          |
| H | 0.3001   | -1.63204 | 4.41803  |                                                           |          |          |          |
| H | 1.50365  | 0.12127  | 5.70971  | TS6b'                                                     |          |          |          |
| C | 3.54912  | -0.45056 | -0.4472  | Number of imaginary frequencies=1                         |          |          |          |
| C | 3.84568  | -0.60867 | -1.81289 | Charge = 0 Multiplicity = 1                               |          |          |          |
| C | 4.54349  | -0.69999 | 0.50806  | C                                                         | -4.04544 | 2.60483  | -2.11812 |
| C | 5.12605  | -0.99365 | -2.20717 | C                                                         | -3.6718  | 1.33002  | -1.69372 |

|   |          |          |          |    |          |          |          |
|---|----------|----------|----------|----|----------|----------|----------|
| C | -2.49905 | 1.13899  | -0.94901 | H  | -4.53761 | 0.63262  | 0.58812  |
| C | -1.74119 | 2.27789  | -0.64139 | C  | -3.96087 | -0.19038 | 3.83737  |
| C | -2.09956 | 3.57299  | -1.03393 | H  | -2.17804 | -1.15878 | 4.57212  |
| C | -3.2658  | 3.71498  | -1.79185 | H  | -5.59637 | 0.77805  | 2.81447  |
| H | -4.95012 | 2.73371  | -2.70539 | H  | -4.42488 | -0.11662 | 4.81745  |
| H | -4.28707 | 0.47724  | -1.95814 | C  | 2.31739  | 0.40595  | 1.91804  |
| H | -3.57749 | 4.69774  | -2.12925 | C  | 2.43176  | 1.51536  | 2.76629  |
| O | -0.59055 | 2.08628  | 0.09515  | C  | 2.45564  | -0.88377 | 2.46337  |
| C | -1.22116 | 4.73238  | -0.54584 | C  | 2.6793   | 1.34164  | 4.13127  |
| C | -1.41613 | 6.00033  | -1.3935  | H  | 2.3301   | 2.51823  | 2.36284  |
| H | -2.45428 | 6.3431   | -1.34396 | C  | 2.71559  | -1.05321 | 3.82251  |
| H | -0.79967 | 6.81979  | -1.0115  | H  | 2.3629   | -1.75269 | 1.81529  |
| H | -1.15625 | 5.83172  | -2.44388 | C  | 2.82425  | 0.05983  | 4.66186  |
| C | -1.60849 | 5.05433  | 0.92682  | H  | 2.76233  | 2.21203  | 4.77717  |
| H | -1.48663 | 4.1783   | 1.57076  | H  | 2.82941  | -2.05531 | 4.22829  |
| H | -0.97428 | 5.85818  | 1.31838  | H  | 3.02003  | -0.07336 | 5.72264  |
| H | -2.65441 | 5.37768  | 0.98227  | C  | 3.58182  | 0.16953  | -0.68319 |
| C | 0.47504  | 2.90524  | -0.22472 | C  | 3.56682  | -0.22988 | -2.03022 |
| C | 0.23165  | 4.24072  | -0.57218 | C  | 4.80944  | 0.27168  | -0.01042 |
| C | 1.75707  | 2.33815  | -0.19426 | C  | 4.76474  | -0.5009  | -2.69296 |
| C | 1.33784  | 5.03752  | -0.88008 | H  | 2.62396  | -0.34197 | -2.56128 |
| C | 2.83889  | 3.17956  | -0.49714 | C  | 6.00398  | -0.01079 | -0.67657 |
| C | 2.63169  | 4.51568  | -0.83296 | H  | 4.83397  | 0.56618  | 1.03479  |
| H | 1.19652  | 6.07596  | -1.16031 | C  | 5.98347  | -0.39358 | -2.01936 |
| H | 3.84546  | 2.77506  | -0.49603 | H  | 4.7384   | -0.80814 | -3.73484 |
| H | 3.4797   | 5.15073  | -1.07297 | H  | 6.94903  | 0.0673   | -0.14484 |
| P | 1.95313  | 0.52306  | 0.1106   | H  | 6.91403  | -0.61459 | -2.53614 |
| C | -3.09441 | -1.66573 | -1.18669 | P  | -1.91813 | -0.51145 | -0.33794 |
| C | -4.04131 | -2.44146 | -0.50262 | Pd | 0.31017  | -1.21245 | -0.53005 |
| C | -2.95334 | -1.83902 | -2.57894 | C  | 0.30619  | -3.29092 | -0.98895 |
| C | -4.83024 | -3.37054 | -1.18982 | H  | 0.22983  | -2.47169 | -3.0851  |
| H | -4.16657 | -2.32623 | 0.56899  | Cl | 0.40274  | -1.1213  | -4.12401 |
| C | -3.75162 | -2.7591  | -3.26112 | N  | -0.0382  | -3.47578 | -2.37718 |
| H | -2.20852 | -1.26693 | -3.13043 | H  | -1.04162 | -3.62408 | -2.51544 |
| C | -4.691   | -3.53095 | -2.56799 | H  | 0.47304  | -4.26026 | -2.79592 |
| H | -5.5563  | -3.96523 | -0.64145 | O  | 1.53805  | -3.00297 | -0.77838 |
| H | -3.63697 | -2.86984 | -4.33645 | C  | -0.44802 | -4.20537 | -0.02407 |
| H | -5.30869 | -4.24925 | -3.10061 | C  | -0.00027 | -5.67407 | -0.14247 |
| C | -2.76053 | -0.3723  | 1.30371  | C  | -0.46091 | -6.46074 | -1.19861 |
| C | -2.10605 | -0.86729 | 2.44051  | C  | 0.86586  | -6.21786 | 0.80604  |
| C | -4.02263 | 0.22644  | 1.45407  | C  | -0.05601 | -7.79108 | -1.30576 |
| C | -2.70286 | -0.77799 | 3.70022  | H  | -1.14435 | -6.03196 | -1.9458  |
| H | -1.1168  | -1.30444 | 2.33336  | C  | 1.27177  | -7.5483  | 0.69845  |
| C | -4.61952 | 0.31256  | 2.71192  | H  | 1.22916  | -5.59793 | 1.63841  |

|                                              |                  |          |          |    |          |          |          |
|----------------------------------------------|------------------|----------|----------|----|----------|----------|----------|
| C                                            | 0.8109           | -8.33497 | -0.35715 | H  | -4.63765 | -1.29617 | 0.22757  |
| H                                            | -0.41955         | -8.41138 | -2.13784 | C  | -4.77329 | -0.54201 | -3.56942 |
| H                                            | 1.955            | -7.97666 | 1.44623  | H  | -2.70417 | 0.03981  | -3.39538 |
| H                                            | 1.13006          | -9.3839  | -0.44187 | C  | -5.9009  | -1.04194 | -2.91505 |
| H                                            | -0.25039         | -3.86071 | 0.96944  | H  | -6.70747 | -1.7144  | -1.0304  |
| C                                            | -1.96846         | -4.10504 | -0.24717 | H  | -4.80419 | -0.33932 | -4.63673 |
| H                                            | -2.38265         | -3.39167 | 0.43434  | H  | -6.81808 | -1.22752 | -3.46807 |
| H                                            | -2.16163         | -3.7922  | -1.25202 | C  | -2.15282 | -0.94432 | 1.07291  |
| H                                            | -2.41753         | -5.06155 | -0.07885 | C  | -1.3963  | -2.07259 | 1.42165  |
| Thermal correction to Energy=                | 0.843004         |          |          | C  | -3.0571  | -0.42151 | 2.01556  |
| Thermal correction to Enthalpy=              | 0.843948         |          |          | C  | -1.54855 | -2.67676 | 2.67225  |
| Thermal correction to Gibbs Free Energy=     | 0.703853         |          |          | H  | -0.67126 | -2.46304 | 0.71131  |
| Sum of electronic and zero-point Energies=   | -3329.700465     |          |          | C  | -3.20784 | -1.02373 | 3.26451  |
| Sum of electronic and thermal Energies=      | -3329.650321     |          |          | H  | -3.63779 | 0.4642   | 1.7755   |
| Sum of electronic and thermal Enthalpies=    | -3329.649377     |          |          | C  | -2.45618 | -2.15544 | 3.59411  |
| Sum of electronic and thermal Free Energies= | -3329.789472     |          |          | H  | -0.94867 | -3.54632 | 2.92637  |
| SCF Done: E(RM06) =                          | -3330.71821400   |          |          | H  | -3.91094 | -0.60805 | 3.98154  |
|                                              |                  |          |          | H  | -2.5739  | -2.62195 | 4.56869  |
| <b>cat0</b>                                  |                  |          |          | C  | 2.42667  | -0.90894 | 0.70065  |
| Number of imaginary frequencies=             | 0                |          |          | C  | 1.90504  | -0.38803 | 1.89601  |
| Charge = 0                                   | Multiplicity = 1 |          |          | C  | 3.18224  | -2.09248 | 0.75824  |
| C                                            | -2.57529         | 3.86152  | -0.97033 | C  | 2.14921  | -1.02035 | 3.1162   |
| C                                            | -2.57441         | 2.48617  | -1.20914 | H  | 1.31082  | 0.52024  | 1.87655  |
| C                                            | -1.99361         | 1.60395  | -0.28607 | C  | 3.42394  | -2.72379 | 1.97882  |
| C                                            | -1.39517         | 2.13532  | 0.86862  | H  | 3.58984  | -2.51897 | -0.15346 |
| C                                            | -1.39965         | 3.50956  | 1.10569  | C  | 2.91094  | -2.18891 | 3.16279  |
| C                                            | -1.9929          | 4.37785  | 0.18772  | H  | 1.74071  | -0.59752 | 4.03012  |
| H                                            | -3.03692         | 4.52795  | -1.69408 | H  | 4.01832  | -3.63346 | 2.00343  |
| H                                            | -3.032           | 2.10559  | -2.11512 | H  | 3.10266  | -2.6798  | 4.11312  |
| H                                            | -1.99837         | 5.4487   | 0.37282  | C  | 3.44493  | -0.42501 | -2.0054  |
| C                                            | 1.24817          | 2.42391  | -1.60831 | C  | 3.24881  | -0.64518 | -3.37695 |
| C                                            | 1.32736          | 3.81728  | -1.56182 | C  | 4.75286  | -0.30512 | -1.50769 |
| C                                            | 1.98453          | 1.65157  | -0.69611 | C  | 4.34897  | -0.76526 | -4.23007 |
| C                                            | 2.12668          | 4.44902  | -0.60842 | H  | 2.23998  | -0.69057 | -3.78009 |
| C                                            | 2.79753          | 2.2908   | 0.25447  | C  | 5.84663  | -0.43574 | -2.3628  |
| C                                            | 2.86101          | 3.68358  | 0.30073  | H  | 4.92181  | -0.11974 | -0.4509  |
| H                                            | 2.18237          | 5.53418  | -0.57434 | C  | 5.6462   | -0.66909 | -3.72608 |
| H                                            | 3.38229          | 1.70788  | 0.9596   | H  | 4.18351  | -0.93472 | -5.29036 |
| H                                            | 3.49067          | 4.16923  | 1.04204  | H  | 6.8547   | -0.35296 | -1.96467 |
| P                                            | 1.96433          | -0.17715 | -0.92798 | H  | 6.49977  | -0.76903 | -4.39163 |
| C                                            | -3.52921         | -0.56058 | -1.48155 | P  | -1.92801 | -0.21761 | -0.61257 |
| C                                            | -4.66339         | -1.07351 | -0.83336 | Pd | 0.00986  | -1.23209 | -1.78371 |
| C                                            | -3.58961         | -0.31137 | -2.86556 | H  | 1.09742  | -2.26504 | -2.34436 |
| C                                            | -5.83956         | -1.31339 | -1.54775 | Cl | -0.3382  | 0.30786  | -4.13862 |

|                                                          |          |          |          |                                        |          |          |          |
|----------------------------------------------------------|----------|----------|----------|----------------------------------------|----------|----------|----------|
| H                                                        | 0.63244  | 1.9368   | -2.36261 | H                                      | -5.66987 | 0.92371  | -3.99696 |
| H                                                        | -0.93858 | 1.47375  | 1.59856  | H                                      | -6.80287 | -1.26772 | -3.66731 |
| H                                                        | -0.93611 | 3.90026  | 2.00755  | C                                      | -1.53677 | -1.53731 | 0.06731  |
| H                                                        | 0.75575  | 4.40558  | -2.2738  | C                                      | -0.77405 | -2.53498 | -0.56462 |
| Thermal correction to Energy= 0.598628                   |          |          |          | C                                      | -1.9538  | -1.74141 | 1.38994  |
| Thermal correction to Enthalpy= 0.599573                 |          |          |          | C                                      | -0.44395 | -3.71202 | 0.10844  |
| Thermal correction to Gibbs Free Energy= 0.484100        |          |          |          | H                                      | -0.43375 | -2.38378 | -1.58614 |
| Sum of electronic and zero-point Energies= -2659.624959  |          |          |          | C                                      | -1.61657 | -2.91733 | 2.0654   |
| Sum of electronic and thermal Energies= -2659.587262     |          |          |          | H                                      | -2.5359  | -0.98047 | 1.89965  |
| Sum of electronic and thermal Enthalpies= -2659.586318   |          |          |          | C                                      | -0.86237 | -3.90438 | 1.42796  |
| Sum of electronic and thermal Free Energies=-2659.701790 |          |          |          | H                                      | 0.14452  | -4.47385 | -0.39562 |
| SCF Done: E(RM06) = -2660.652892                         |          |          |          | H                                      | -1.94625 | -3.06079 | 3.09131  |
|                                                          |          |          |          | H                                      | -0.60154 | -4.81816 | 1.95532  |
| <b>cat0'</b>                                             |          |          |          | C                                      | 3.23774  | 2.04911  | -3.25913 |
| Number of imaginary frequencies=0                        |          |          |          | C                                      | 3.29985  | 3.43374  | -3.03432 |
| Charge = 0 Multiplicity = 1                              |          |          |          | C                                      | 4.27072  | 1.23665  | -2.7609  |
| C                                                        | -4.23271 | 2.10475  | 1.79532  | C                                      | 4.37178  | 3.99221  | -2.33499 |
| C                                                        | -3.80873 | 1.14186  | 0.87935  | H                                      | 2.51479  | 4.08119  | -3.41078 |
| C                                                        | -2.52776 | 1.21835  | 0.30559  | C                                      | 5.3429   | 1.79951  | -2.06859 |
| C                                                        | -1.69393 | 2.28972  | 0.6553   | H                                      | 4.24565  | 0.16286  | -2.91652 |
| C                                                        | -2.11914 | 3.25338  | 1.57186  | C                                      | 5.39693  | 3.17812  | -1.85249 |
| C                                                        | -3.38799 | 3.16167  | 2.14473  | H                                      | 4.40544  | 5.06657  | -2.17439 |
| H                                                        | -5.22664 | 2.0345   | 2.22945  | H                                      | 6.13235  | 1.15434  | -1.69377 |
| H                                                        | -4.47973 | 0.33581  | 0.59767  | H                                      | 6.2322   | 3.61401  | -1.31104 |
| H                                                        | -3.7227  | 3.91462  | 2.85346  | C                                      | 2.55128  | 0.19444  | -5.39077 |
| C                                                        | -0.17726 | 3.21342  | -4.67152 | C                                      | 1.82402  | -0.91242 | -5.85781 |
| C                                                        | -0.72628 | 4.30979  | -5.34072 | C                                      | 3.81905  | 0.45325  | -5.93953 |
| C                                                        | 1.07212  | 2.70196  | -5.05118 | C                                      | 2.34665  | -1.73143 | -6.86008 |
| C                                                        | -0.03834 | 4.89824  | -6.40226 | H                                      | 0.85042  | -1.13201 | -5.42949 |
| C                                                        | 1.75822  | 3.30193  | -6.11948 | C                                      | 4.33958  | -0.37013 | -6.93881 |
| C                                                        | 1.2036   | 4.3901   | -6.79256 | H                                      | 4.41033  | 1.28911  | -5.57883 |
| H                                                        | -0.46968 | 5.74502  | -6.92946 | C                                      | 3.60395  | -1.46242 | -7.4032  |
| H                                                        | 2.72105  | 2.91407  | -6.43746 | H                                      | 1.77028  | -2.58347 | -7.2099  |
| H                                                        | 1.73969  | 4.83852  | -7.62476 | H                                      | 5.32215  | -0.15786 | -7.35193 |
| P                                                        | 1.78566  | 1.28026  | -4.1079  | H                                      | 4.01192  | -2.10355 | -8.18007 |
| C                                                        | -3.47903 | -0.48152 | -1.79562 | P                                      | -1.91992 | -0.02274 | -0.92029 |
| C                                                        | -4.11807 | -1.71722 | -1.6206  | Pd                                     | 0.04803  | 0.64078  | -2.35456 |
| C                                                        | -4.04911 | 0.46503  | -2.6636  | H                                      | -0.72637 | 2.73667  | -3.86424 |
| C                                                        | -5.31032 | -1.99775 | -2.29309 | H                                      | -0.71188 | 2.37147  | 0.20116  |
| H                                                        | -3.69193 | -2.46456 | -0.95961 | H                                      | -1.45999 | 4.07742  | 1.83109  |
| C                                                        | -5.24318 | 0.18388  | -3.32534 | H                                      | -1.69649 | 4.693    | -5.03698 |
| H                                                        | -3.54917 | 1.41144  | -2.83726 | Cl                                     | 1.90946  | 0.80513  | -1.00777 |
| C                                                        | -5.87626 | -1.04786 | -3.14341 | H                                      | -0.79215 | 0.66958  | -3.69234 |
| H                                                        | -5.79427 | -2.96025 | -2.14842 | Thermal correction to Energy= 0.598761 |          |          |          |

|                                              |                  |          |          |          |          |          |          |         |
|----------------------------------------------|------------------|----------|----------|----------|----------|----------|----------|---------|
| Thermal correction to Enthalpy=              | 0.599705         |          | C        | -1.54118 | 4.57138  | 0.75568  |          |         |
| Thermal correction to Gibbs Free Energy=     | 0.482809         |          | H        | -2.56639 | 5.0729   | -1.07479 |          |         |
| Sum of electronic and zero-point Energies=   | -2659.641204     |          | H        | -2.79508 | 2.73992  | -1.81762 |          |         |
| Sum of electronic and thermal Energies=      | -2659.603422     |          | H        | -1.44528 | 5.60281  | 1.0841   |          |         |
| Sum of electronic and thermal Enthalpies=    | -2659.602478     |          | C        | 1.42652  | 2.77377  | -1.4021  |          |         |
| Sum of electronic and thermal Free Energies= | -2659.719374     |          | C        | 1.62241  | 4.1468   | -1.23445 |          |         |
| SCF Done: E(RM06) =                          | -2660.65538393   |          | C        | 2.15929  | 1.86381  | -0.62538 |          |         |
|                                              |                  |          | C        | 2.53757  | 4.62128  | -0.29465 |          |         |
| <b>R1</b>                                    |                  |          | C        | 3.093    | 2.34591  | 0.3077   |          |         |
| Number of imaginary frequencies=             | 0                |          | C        | 3.27346  | 3.71808  | 0.47708  |          |         |
| Charge =0                                    | Multiplicity = 1 |          | H        | 2.68437  | 5.69078  | -0.16625 |          |         |
| C                                            | -1.27585         | -2.85002 | -2.61046 | H        | 3.68324  | 1.65421  | 0.90113  |         |
| H                                            | -1.78885         | -2.40907 | -3.45794 | H        | 3.99569  | 4.08082  | 1.20415  |         |
| H                                            | -1.88906         | -3.1113  | -1.7532  | P        | 1.97473  | 0.06862  | -1.00554 |         |
| C                                            | -0.05955         | -3.52671 | -2.79305 | C        | -3.53243 | 0.08931  | -1.56044 |         |
| H                                            | 0.25626          | -4.18485 | -1.98501 | C        | -4.74068 | -0.34679 | -0.99444 |         |
| C                                            | 0.57952          | -3.81875 | -4.1004  | C        | -3.52225 | 0.52498  | -2.89799 |         |
| C                                            | 1.3633           | -4.97864 | -4.20908 | C        | -5.92111 | -0.31708 | -1.74027 |         |
| C                                            | 0.39359          | -3.00814 | -5.2334  | H        | -4.77166 | -0.71532 | 0.02486  |         |
| C                                            | 1.9307           | -5.34255 | -5.43004 | C        | -4.71032 | 0.56878  | -3.62991 |         |
| H                                            | 1.51749          | -5.60644 | -3.33371 | H        | -2.58358 | 0.80696  | -3.37317 |         |
| C                                            | 0.97084          | -3.37218 | -6.44833 | C        | -5.91173 | 0.15249  | -3.05466 |         |
| H                                            | -0.15299         | -2.07233 | -5.14578 | H        | -6.84862 | -0.65964 | -1.28821 |         |
| C                                            | 1.73289          | -4.53994 | -6.55486 | H        | -4.68514 | 0.91022  | -4.66092 |         |
| H                                            | 2.52702          | -6.24837 | -5.50044 | H        | -6.8334  | 0.18046  | -3.63034 |         |
| H                                            | 0.82902          | -2.7335  | -7.316   | C        | -2.24581 | -0.74374 | 0.95153  |         |
| H                                            |                  | 2.17603  | -4.81802 | -7.50759 | C        | -1.53791 | -1.92023 | 1.23547 |
| Thermal correction to Energy=                | 0.140555         |          | C        | -3.16386 | -0.26493 | 1.90464  |          |         |
| Thermal correction to Enthalpy=              | 0.141499         |          | C        | -1.75802 | -2.61869 | 2.42578  |          |         |
| Thermal correction to Gibbs Free Energy=     | 0.102415         |          | H        | -0.79185 | -2.27504 | 0.53016  |          |         |
| Sum of electronic and zero-point Energies=   | -309.508005      |          | C        | -3.385   | -0.96225 | 3.09169  |          |         |
| Sum of electronic and thermal Energies=      | -309.501251      |          | H        | -3.69786 | 0.6628   | 1.72247  |          |         |
| Sum of electronic and thermal Enthalpies=    | -309.500307      |          | C        | -2.68584 | -2.14452 | 3.35246  |          |         |
| Sum of electronic and thermal Free Energies= | -309.539391      |          | H        | -1.19389 | -3.52453 | 2.62999  |          |         |
| SCF Done: E(RM06) =                          | -309.4762247     |          | H        | -4.09965 | -0.5801  | 3.81586  |          |         |
|                                              |                  |          | H        | -2.85743 | -2.68522 | 4.27948  |          |         |
| <b>TS2a''</b>                                |                  |          | C        | 2.32903  | -0.83176 | 0.56614  |          |         |
| Number of imaginary frequencies=             | 1                |          | C        | 1.95182  | -0.31076 | 1.81446  |          |         |
| Charge =0                                    | Multiplicity = 1 |          | C        | 2.83869  | -2.14206 | 0.51576  |          |         |
| C                                            | -2.16924         | 4.27402  | -0.45417 | C        | 2.09606  | -1.06912 | 2.97836  |         |
| C                                            | -2.29914         | 2.94971  | -0.87676 | H        | 1.55134  | 0.69563  | 1.88103  |         |
| C                                            | -1.80446         | 1.89995  | -0.08941 | C        | 2.98409  | -2.89701 | 1.67952  |         |
| C                                            | -1.1607          | 2.21069  | 1.12003  | H        | 3.13394  | -2.57053 | -0.43785 |         |
| C                                            | -1.03456         | 3.53431  | 1.54082  | C        | 2.61437  | -2.36301 | 2.91676  |         |



|                                                         |          |          |          |                                                          |
|---------------------------------------------------------|----------|----------|----------|----------------------------------------------------------|
| H                                                       | 1.80287  | -0.64358 | 3.93445  | Sum of electronic and thermal Free Energies=-2969.192847 |
| H                                                       | 3.39101  | -3.90316 | 1.61907  | SCF Done: E(RM06) = -2970.127145                         |
| H                                                       | 2.73017  | -2.95085 | 3.82329  |                                                          |
| C                                                       | 3.46841  | -0.22802 | -2.05905 |                                                          |
| C                                                       | 3.31566  | -0.16777 | -3.45376 | <b>Int3a''</b>                                           |
| C                                                       | 4.74941  | -0.41608 | -1.51629 | Number of imaginary frequencies=0                        |
| C                                                       | 4.42901  | -0.31037 | -4.28556 | Charge =0 Multiplicity = 1                               |
| H                                                       | 2.33252  | 0.01508  | -3.88423 | C -2.18955 4.26198 -0.37995                              |
| C                                                       | 5.85517  | -0.56904 | -2.35366 | C -2.30903 2.94522 -0.82893                              |
| H                                                       | 4.8885   | -0.45432 | -0.43992 | C -1.79008 1.88517 -0.0717                               |
| C                                                       | 5.69697  | -0.51797 | -3.74048 | C -1.13825 2.17767 1.13786                               |
| H                                                       | 4.29922  | -0.25633 | -5.36317 | C -1.02298 3.49342 1.58554                               |
| H                                                       | 6.84013  | -0.72529 | -1.92107 | C -1.54967 4.54118 0.82795                               |
| H                                                       | 6.55965  | -0.63458 | -4.39141 | H -2.60428 5.06912 -0.97805                              |
| P                                                       | -1.92532 | 0.1354   | -0.64481 | H -2.81565 2.74824 -1.76729                              |
| Pd                                                      | -0.0807  | -0.85554 | -1.96972 | H -1.46108 5.56654 1.17682                               |
| C                                                       | -1.35362 | -2.61875 | -2.53983 | C 1.41711 2.74607 -1.45067                               |
| H                                                       | -1.97235 | -2.72643 | -1.65184 | C 1.58824 4.12688 -1.32491                               |
| C                                                       | -0.03735 | -3.09739 | -2.44914 | C 2.16873 1.87303 -0.65029                               |
| H                                                       | 1.04149  | -1.64153 | -2.77869 | C 2.49929 4.64488 -0.40447                               |
| H                                                       | 0.3411   | -3.50369 | -1.5162  | C 3.10072 2.39889 0.26071                                |
| Cl                                                      | -0.17515 | 0.90302  | -4.06233 | C 3.25722 3.77842 0.38807                                |
| H                                                       | 0.72922  | 2.40683  | -2.15222 | H 2.62693 5.72017 -0.30812                               |
| H                                                       | -0.76946 | 1.4154   | 1.74705  | H 3.70828 1.73538 0.869                                  |
| H                                                       | -0.53901 | 3.75364  | 2.48283  | H 3.97764 4.17586 1.09857                                |
| H                                                       | 1.05257  | 4.84301  | -1.84304 | P 2.00904 0.06413 -0.97271                               |
| H                                                       | 0.47007  | -3.43913 | -3.34668 | C -3.47008 0.10253 -1.61759                              |
| C                                                       | -2.1043  | -2.55359 | -3.81257 | C -4.69865 -0.29629 -1.06884                             |
| C                                                       | -3.4632  | -2.91083 | -3.81142 | C -3.42363 0.52656 -2.95795                              |
| C                                                       | -1.49854 | -2.21181 | -5.03456 | C -5.86411 -0.24368 -1.83603                             |
| C                                                       | -4.19123 | -2.95885 | -4.99927 | H -4.75601 -0.6538 -0.04664                              |
| H                                                       | -3.94953 | -3.15747 | -2.8707  | C -4.59687 0.59257 -3.71202                              |
| C                                                       | -2.22949 | -2.25498 | -6.21916 | H -2.47036 0.78415 -3.41809                              |
| H                                                       | -0.47372 | -1.85753 | -5.04696 | C -5.81836 0.2118 -3.15464                               |
| C                                                       | -3.5746  | -2.63515 | -6.20919 | H -6.80836 -0.55772 -1.39811                             |
| H                                                       | -5.23985 | -3.24362 | -4.9775  | H -4.54477 0.92363 -4.7453                               |
| H                                                       | -1.74979 | -1.97337 | -7.15256 | H -6.72831 0.25693 -3.74762                              |
| H                                                       | -4.14028 | -2.66611 | -7.13686 | C -2.21716 -0.7914 0.89445                               |
| Thermal correction to Energy= 0.740602                  |          |          |          | C -1.52578 -1.98685 1.13862                              |
| Thermal correction to Enthalpy= 0.741546                |          |          |          | C -3.13191 -0.33399 1.86058                              |
| Thermal correction to Gibbs Free Energy= 0.610298       |          |          |          | C -1.76015 -2.72392 2.30237                              |
| Sum of electronic and zero-point Energies= -2969.108044 |          |          |          | H -0.78118 -2.32512 0.42311                              |
| Sum of electronic and thermal Energies= -2969.062543    |          |          |          | C -3.36676 -1.06988 3.02169                              |
| Sum of electronic and thermal Enthalpies= -2969.061599  |          |          |          | H -3.65195 0.60724 1.71002                               |

|    |          |          |          |
|----|----------|----------|----------|
| C  | -2.68491 | -2.27001 | 3.24251  |
| H  | -1.20931 | -3.64415 | 2.47662  |
| H  | -4.07871 | -0.70382 | 3.75678  |
| H  | -2.86697 | -2.84066 | 4.14936  |
| C  | 2.32762  | -0.7816  | 0.63903  |
| C  | 1.96852  | -0.20422 | 1.8674   |
| C  | 2.80198  | -2.10624 | 0.63734  |
| C  | 2.09445  | -0.92307 | 3.05849  |
| H  | 1.59737  | 0.81479  | 1.8976   |
| C  | 2.93027  | -2.82101 | 1.82771  |
| H  | 3.0853   | -2.57735 | -0.29978 |
| C  | 2.57724  | -2.23168 | 3.04475  |
| H  | 1.81552  | -0.45425 | 3.9985   |
| H  | 3.31025  | -3.83915 | 1.80411  |
| H  | 2.67836  | -2.78845 | 3.97237  |
| C  | 3.53457  | -0.25365 | -1.97159 |
| C  | 3.42724  | -0.17929 | -3.3702  |
| C  | 4.79283  | -0.47001 | -1.38826 |
| C  | 4.56853  | -0.32933 | -4.16545 |
| H  | 2.45902  | 0.01812  | -3.83036 |
| C  | 5.92368  | -0.63377 | -2.18998 |
| H  | 4.89495  | -0.5221  | -0.30846 |
| C  | 5.81381  | -0.56525 | -3.5804  |
| H  | 4.47572  | -0.26244 | -5.24614 |
| H  | 6.89037  | -0.81251 | -1.726   |
| H  | 6.69572  | -0.69091 | -4.20323 |
| P  | -1.87819 | 0.13307  | -0.67208 |
| Pd | -0.0142  | -0.78425 | -1.97803 |
| C  | -1.25008 | -2.73295 | -2.69206 |
| H  | -1.71378 | -2.97208 | -1.73871 |
| C  | 0.13631  | -3.00585 | -2.8064  |
| H  | 0.96144  | -1.83658 | -2.79922 |
| H  | 0.62596  | -3.53326 | -1.98772 |
| Cl | -0.07435 | 0.80706  | -4.21103 |
| H  | 0.72676  | 2.34479  | -2.18919 |
| H  | -0.73118 | 1.37331  | 1.7429   |
| H  | -0.52061 | 3.69871  | 2.5272   |
| H  | 1.00372  | 4.79447  | -1.95136 |
| H  | 0.52434  | -3.25935 | -3.80027 |
| C  | -2.16988 | -2.61823 | -3.83133 |
| C  | -3.50018 | -3.05077 | -3.67556 |
| C  | -1.75815 | -2.14949 | -5.0937  |
| C  | -4.38383 | -3.0441  | -4.75272 |
| H  | -3.83719 | -3.39836 | -2.70305 |

|   |          |          |          |
|---|----------|----------|----------|
| C | -2.6465  | -2.13772 | -6.16591 |
| H | -0.76248 | -1.73252 | -5.21291 |
| C | -3.9592  | -2.59203 | -6.00607 |
| H | -5.40585 | -3.38654 | -4.6143  |
| H | -2.31488 | -1.75755 | -7.12831 |
| H | -4.64683 | -2.58187 | -6.84788 |

Thermal correction to Energy= 0.746086

Thermal correction to Enthalpy= 0.747030

Thermal correction to Gibbs Free Energy= 0.614918

Sum of electronic and zero-point Energies= -2969.140720

Sum of electronic and thermal Energies= -2969.095121

Sum of electronic and thermal Enthalpies= -2969.094177

Sum of electronic and thermal Free Energies= -2969.226290

SCF Done: E(RM06) = -2970.155785

#### TS4a''

Number of imaginary frequencies=1

Charge = 0 Multiplicity = 1

|   |          |          |          |
|---|----------|----------|----------|
| P | -1.90158 | 0.80639  | 0.28512  |
| P | 2.51669  | 0.71545  | -0.17966 |
| C | -2.14806 | 0.36476  | 2.06345  |
| C | -2.3497  | -0.98708 | 2.4003   |
| C | -2.02171 | 1.30177  | 3.10101  |
| C | -2.44228 | -1.38347 | 3.73363  |
| C | -2.10169 | 0.8991   | 4.4376   |
| C | -2.31491 | -0.44173 | 4.75855  |
| C | -3.49875 | 0.34135  | -0.52465 |
| C | -3.52727 | 0.36458  | -1.93106 |
| C | -4.66316 | -0.00742 | 0.17574  |
| C | -4.70232 | 0.04972  | -2.61519 |
| C | -5.8343  | -0.32887 | -0.51552 |
| C | -5.85762 | -0.30007 | -1.91091 |
| C | -2.00426 | 2.65116  | 0.27154  |
| C | -3.1913  | 3.33565  | 0.58582  |
| C | -0.86605 | 3.38968  | -0.07367 |
| C | -3.22732 | 4.72903  | 0.57046  |
| C | -0.903   | 4.78664  | -0.09025 |
| C | -2.08168 | 5.45735  | 0.23423  |
| C | 2.96967  | 0.58498  | 1.60483  |
| C | 1.94469  | 0.63474  | 2.56154  |
| C | 4.29979  | 0.46465  | 2.04138  |
| C | 2.23997  | 0.57371  | 3.92428  |
| C | 4.59297  | 0.39872  | 3.4042   |
| C | 3.56433  | 0.45393  | 4.34801  |

|    |          |          |          |                                                           |          |          |          |
|----|----------|----------|----------|-----------------------------------------------------------|----------|----------|----------|
| C  | 3.89771  | -0.1724  | -1.031   | O                                                         | 0.77503  | -2.4781  | 1.33685  |
| C  | 4.69147  | 0.42775  | -2.01771 | C                                                         | -0.23407 | -2.66543 | -1.44872 |
| C  | 4.12586  | -1.52175 | -0.70719 | C                                                         | 1.04711  | -3.28681 | -1.97348 |
| C  | 5.68959  | -0.30484 | -2.6663  | H                                                         | 1.69235  | -2.52446 | -2.41487 |
| C  | 5.12965  | -2.24595 | -1.34722 | Cl                                                        | 0.00682  | 0.64583  | -2.97692 |
| C  | 5.91354  | -1.63996 | -2.33327 | H                                                         | 1.61788  | -3.81402 | -1.20228 |
| C  | 2.81207  | 2.4943   | -0.58525 | H                                                         | -0.66378 | -1.95766 | -2.15584 |
| C  | 3.46056  | 3.36655  | 0.30418  | H                                                         | 0.79756  | -4.02    | -2.75502 |
| C  | 2.36982  | 2.98713  | -1.8263  | C                                                         | -1.26307 | -3.54785 | -0.85387 |
| C  | 3.67394  | 4.70124  | -0.04505 | C                                                         | -0.93103 | -4.7308  | -0.16445 |
| C  | 2.5958   | 4.32118  | -2.17217 | C                                                         | -2.6278  | -3.22664 | -0.99566 |
| C  | 3.24789  | 5.18104  | -1.28512 | C                                                         | -1.92393 | -5.55814 | 0.3567   |
| H  | 4.1759   | 5.3645   | 0.6546   | H                                                         | 0.11075  | -5.00446 | -0.03233 |
| H  | 2.24999  | 4.68705  | -3.13517 | C                                                         | -3.61963 | -4.05313 | -0.4713  |
| H  | 3.41881  | 6.21968  | -1.55631 | H                                                         | -2.90815 | -2.32385 | -1.52996 |
| H  | -2.62578 | 0.61644  | -2.48557 | C                                                         | -3.27262 | -5.22384 | 0.20877  |
| H  | -4.65897 | -0.03617 | 1.26076  | H                                                         | -1.6433  | -6.46785 | 0.88139  |
| H  | 1.82745  | 2.33535  | -2.50607 | H                                                         | -4.66388 | -3.78119 | -0.59911 |
| H  | 3.79955  | 3.00932  | 1.27043  | H                                                         | -4.04489 | -5.87093 | 0.61615  |
| H  | 6.29298  | 0.17584  | -3.43172 | Thermal correction to Energy= 0.755393                    |          |          |          |
| H  | 5.29655  | -3.28588 | -1.07914 | Thermal correction to Enthalpy= 0.756337                  |          |          |          |
| H  | 6.69112  | -2.20705 | -2.83778 | Thermal correction to Gibbs Free Energy= 0.616511         |          |          |          |
| H  | 3.52222  | -2.00741 | 0.05469  | Sum of electronic and zero-point Energies= -3082.449752   |          |          |          |
| H  | 4.53522  | 1.46703  | -2.28545 | Sum of electronic and thermal Energies= -3082.401582      |          |          |          |
| H  | 1.43011  | 0.60684  | 4.64767  | Sum of electronic and thermal Enthalpies= -3082.400638    |          |          |          |
| H  | 5.62599  | 0.30205  | 3.72791  | Sum of electronic and thermal Free Energies= -3082.540463 |          |          |          |
| H  | 3.79526  | 0.39739  | 5.40849  | SCF Done: E(RM06) = -3083.440538                          |          |          |          |
| H  | 5.10663  | 0.41715  | 1.31652  | Int5a''                                                   |          |          |          |
| H  | 0.90988  | 0.70971  | 2.24151  | Number of imaginary frequencies=0                         |          |          |          |
| H  | -4.15117 | 5.2473   | 0.81438  | Charge =0 Multiplicity = 1                                |          |          |          |
| H  | -0.01041 | 5.34093  | -0.36638 | P                                                         | -1.8964  | 0.64305  | 0.35019  |
| H  | -2.11406 | 6.54376  | 0.21811  | P                                                         | 2.85629  | 0.68152  | -0.18015 |
| H  | 0.04458  | 2.87141  | -0.35118 | C                                                         | -2.5639  | 0.44332  | 2.06421  |
| H  | -4.0901  | 2.77879  | 0.83481  | C                                                         | -2.68976 | -0.84914 | 2.59878  |
| H  | -4.71076 | 0.07195  | -3.70174 | C                                                         | -2.91377 | 1.54066  | 2.86437  |
| H  | -6.72912 | -0.5979  | 0.04031  | C                                                         | -3.16126 | -1.04211 | 3.89585  |
| H  | -6.76981 | -0.54967 | -2.44667 | C                                                         | -3.38125 | 1.34589  | 4.16672  |
| H  | -2.44351 | -1.73503 | 1.617    | C                                                         | -3.50844 | 0.05736  | 4.68501  |
| H  | -1.86626 | 2.35029  | 2.86889  | C                                                         | -3.07653 | -0.32379 | -0.68879 |
| H  | -2.60553 | -2.43132 | 3.97055  | C                                                         | -2.65749 | -0.76194 | -1.95638 |
| H  | -2.00555 | 1.64091  | 5.22654  | C                                                         | -4.37923 | -0.62399 | -0.25707 |
| H  | -2.38068 | -0.75249 | 5.79784  | C                                                         | -3.52811 | -1.48771 | -2.77074 |
| Pd | 0.32915  | -0.3156  | -0.6909  | C                                                         | -5.24424 | -1.35219 | -1.07612 |
| C  | 0.50968  | -1.79965 | 0.42979  |                                                           |          |          |          |

|   |          |          |          |                                                          |          |          |          |
|---|----------|----------|----------|----------------------------------------------------------|----------|----------|----------|
| C | -4.81993 | -1.7874  | -2.33308 | H                                                        | -2.89929 | 6.20475  | -0.61516 |
| C | -2.23433 | 2.41627  | -0.01799 | H                                                        | -0.31983 | 3.05035  | 0.75275  |
| C | -3.43889 | 2.84201  | -0.59344 | H                                                        | -4.19129 | 2.11596  | -0.88427 |
| C | -1.2683  | 3.3715   | 0.33204  | H                                                        | -3.19372 | -1.81588 | -3.75135 |
| C | -3.6743  | 4.20156  | -0.80812 | H                                                        | -6.24835 | -1.57979 | -0.72785 |
| C | -1.51095 | 4.72942  | 0.12745  | H                                                        | -5.49346 | -2.35597 | -2.96904 |
| C | -2.71435 | 5.14733  | -0.4453  | H                                                        | -2.45311 | -1.80205 | 2.138    |
| C | 3.94163  | -0.06022 | 1.11791  | H                                                        | -2.82627 | 2.54948  | 2.47641  |
| C | 3.6654   | 0.22152  | 2.46785  | H                                                        | -3.24334 | -2.0516  | 4.28802  |
| C | 5.00779  | -0.92021 | 0.81256  | H                                                        | -3.64826 | 2.20741  | 4.77326  |
| C | 4.44369  | -0.33551 | 3.48167  | H                                                        | -3.87153 | -0.09015 | 5.69873  |
| C | 5.77921  | -1.48451 | 1.83169  | Pd                                                       | 0.46006  | 0.25129  | -0.06512 |
| C | 5.50153  | -1.19253 | 3.1673   | C                                                        | 0.61417  | -1.01478 | 1.49077  |
| C | 3.66171  | 0.20079  | -1.76251 | O                                                        | 0.788    | -0.72062 | 2.64499  |
| C | 4.85589  | 0.80117  | -2.19102 | Cl                                                       | 0.18061  | 1.28389  | -2.35873 |
| C | 3.07985  | -0.8035  | -2.54931 | C                                                        | 0.51196  | -2.50454 | 1.01841  |
| C | 5.46314  | 0.39145  | -3.3782  | H                                                        | 0.03553  | -2.50118 | 0.0311   |
| C | 3.69201  | -1.21465 | -3.73439 | C                                                        | 1.94356  | -3.06538 | 0.84459  |
| C | 4.88387  | -0.61908 | -4.14964 | H                                                        | 2.49262  | -3.03313 | 1.79019  |
| C | 3.20213  | 2.49649  | -0.02356 | H                                                        | 1.89036  | -4.10676 | 0.5085   |
| C | 4.27649  | 2.98471  | 0.74011  | H                                                        | 2.50804  | -2.49432 | 0.10195  |
| C | 2.38839  | 3.41067  | -0.71415 | C                                                        | -0.31052 | -3.38657 | 1.94769  |
| C | 4.52552  | 4.3568   | 0.8168   | C                                                        | -1.38359 | -4.13138 | 1.43607  |
| C | 2.64658  | 4.77999  | -0.63548 | C                                                        | 0.0006   | -3.51487 | 3.3112   |
| C | 3.71052  | 5.25855  | 0.13141  | C                                                        | -2.12608 | -4.98368 | 2.25743  |
| H | 5.3599   | 4.71675  | 1.41315  | H                                                        | -1.64644 | -4.04345 | 0.38489  |
| H | 2.00893  | 5.47205  | -1.17932 | C                                                        | -0.7409  | -4.36469 | 4.1319   |
| H | 3.90507  | 6.32621  | 0.19302  | H                                                        | 0.81235  | -2.93175 | 3.73068  |
| H | -1.66409 | -0.50304 | -2.31167 | C                                                        | -1.80626 | -5.10368 | 3.61026  |
| H | -4.71789 | -0.3007  | 0.72226  | H                                                        | -2.95304 | -5.55035 | 1.83783  |
| H | 1.56292  | 3.04692  | -1.31934 | H                                                        | -0.4852  | -4.45002 | 5.18499  |
| H | 4.92166  | 2.301    | 1.28035  | H                                                        | -2.38035 | -5.76613 | 4.25264  |
| H | 6.38543  | 0.86581  | -3.70291 | Thermal correction to Energy= 0.758191                   |          |          |          |
| H | 3.22722  | -1.98758 | -4.34018 | Thermal correction to Enthalpy= 0.759135                 |          |          |          |
| H | 5.35545  | -0.93307 | -5.07712 | Thermal correction to Gibbs Free Energy= 0.621440        |          |          |          |
| H | 2.13108  | -1.23529 | -2.24826 | Sum of electronic and zero-point Energies=-3082.490590   |          |          |          |
| H | 5.30844  | 1.59362  | -1.60202 | Sum of electronic and thermal Energies=-3082.442969      |          |          |          |
| H | 4.21682  | -0.10459 | 4.51895  | Sum of electronic and thermal Enthalpies=-3082.442025    |          |          |          |
| H | 6.60061  | -2.14903 | 1.57682  | Sum of electronic and thermal Free Energies=-3082.579720 |          |          |          |
| H | 6.10397  | -1.62999 | 3.95898  | SCF Done: E(RM06) = -3083.491696                         |          |          |          |
| H | 5.24377  | -1.1488  | -0.2212  |                                                          |          |          |          |
| H | 2.83637  | 0.87049  | 2.72884  | TS6a''                                                   |          |          |          |
| H | -4.60882 | 4.51906  | -1.26309 | Number of imaginary frequencies=1                        |          |          |          |
| H | -0.7523  | 5.4572   | 0.40252  | Charge =0 Multiplicity = 1                               |          |          |          |

|   |          |          |          |    |          |          |          |
|---|----------|----------|----------|----|----------|----------|----------|
| P | -1.15994 | 0.70969  | 1.08963  | H  | 4.12392  | 3.77581  | -0.10854 |
| P | 2.76577  | 1.07056  | 0.11582  | H  | 7.64824  | 0.45783  | -0.83276 |
| C | -0.94001 | 0.96027  | 2.91248  | H  | 5.34509  | -3.14597 | -0.36044 |
| C | 0.23396  | 0.47529  | 3.50626  | H  | 7.5272   | -2.02663 | -0.77496 |
| C | -1.88457 | 1.61239  | 3.72349  | H  | 3.29871  | -1.79358 | -0.01951 |
| C | 0.45885  | 0.62683  | 4.87675  | H  | 5.61764  | 1.80694  | -0.46829 |
| C | -1.6612  | 1.76389  | 5.09142  | H  | 1.97863  | 4.59991  | 3.52713  |
| C | -0.4894  | 1.26956  | 5.67174  | H  | 5.0442   | 1.74802  | 4.51784  |
| C | -2.7303  | -0.26778 | 0.97097  | H  | 3.69178  | 3.74912  | 5.1216   |
| C | -3.38126 | -0.3336  | -0.2778  | H  | 4.70447  | 0.62647  | 2.34904  |
| C | -3.23832 | -1.02432 | 2.0371   | H  | 1.61691  | 3.47025  | 1.37247  |
| C | -4.51176 | -1.13547 | -0.44424 | H  | -4.32696 | 4.54192  | 0.44455  |
| C | -4.37172 | -1.82679 | 1.86454  | H  | -0.45099 | 4.94027  | -1.38615 |
| C | -5.01124 | -1.88594 | 0.62623  | H  | -2.69907 | 5.88655  | -0.8706  |
| C | -1.70471 | 2.35752  | 0.45215  | H  | 0.15801  | 2.69349  | -0.57413 |
| C | -2.98268 | 2.88365  | 0.70803  | H  | -3.7183  | 2.2964   | 1.24951  |
| C | -0.80688 | 3.11176  | -0.31392 | H  | -5.00664 | -1.16634 | -1.41159 |
| C | -3.33436 | 4.14922  | 0.23971  | H  | -4.75481 | -2.40008 | 2.70495  |
| C | -1.15927 | 4.37894  | -0.7833  | H  | -5.89433 | -2.50542 | 0.49476  |
| C | -2.42026 | 4.90334  | -0.50085 | H  | 0.97967  | -0.0061  | 2.87998  |
| C | 3.14098  | 1.96529  | 1.69249  | H  | -2.79646 | 2.009    | 3.28991  |
| C | 2.37435  | 3.08852  | 2.05123  | H  | 1.37959  | 0.25238  | 5.315    |
| C | 4.09919  | 1.49123  | 2.60154  | H  | -2.40168 | 2.27077  | 5.70473  |
| C | 2.57674  | 3.72888  | 3.27287  | H  | -0.31684 | 1.39146  | 6.73789  |
| C | 4.29296  | 2.12833  | 3.83019  | Pd | 0.69603  | -0.3237  | 0.06624  |
| C | 3.53668  | 3.25062  | 4.16843  | C  | 0.02243  | -2.26936 | -0.55772 |
| C | 4.31616  | 0.10066  | -0.18556 | H  | -0.8376  | -1.09509 | -2.31473 |
| C | 5.55173  | 0.72392  | -0.43114 | Cl | -0.99675 | 0.33584  | -3.24202 |
| C | 4.2541   | -1.30007 | -0.16533 | N  | -0.93192 | -2.14688 | -1.63205 |
| C | 6.70017  | -0.0378  | -0.64034 | H  | -1.89486 | -2.13201 | -1.28378 |
| C | 5.40866  | -2.06101 | -0.37316 | H  | -0.84582 | -2.93121 | -2.28782 |
| C | 6.63143  | -1.43382 | -0.60842 | O  | 1.25156  | -2.20915 | -0.91287 |
| C | 2.83968  | 2.39351  | -1.17105 | C  | -0.43759 | -3.24793 | 0.54584  |
| C | 3.58306  | 3.57775  | -1.02933 | H  | -1.37507 | -2.86226 | 0.96402  |
| C | 2.12297  | 2.17547  | -2.35931 | C  | -0.73759 | -4.61639 | -0.07029 |
| C | 3.61635  | 4.51789  | -2.06011 | C  | 0.23881  | -5.30484 | -0.80856 |
| C | 2.1608   | 3.11864  | -3.3888  | C  | -1.99885 | -5.20725 | 0.08592  |
| C | 2.90796  | 4.28867  | -3.24291 | C  | -0.03979 | -6.5528  | -1.36714 |
| H | 4.19339  | 5.43101  | -1.93708 | H  | 1.2158   | -4.85091 | -0.95322 |
| H | 1.58873  | 2.93531  | -4.29369 | C  | -2.27787 | -6.45847 | -0.46968 |
| H | 2.93252  | 5.0246   | -4.04259 | H  | -2.76781 | -4.68261 | 0.64936  |
| H | -2.99763 | 0.23603  | -1.12256 | C  | -1.29873 | -7.13539 | -1.19789 |
| H | -2.75618 | -0.98585 | 3.00889  | H  | 0.72735  | -7.0704  | -1.93726 |
| H | 1.50385  | 1.28932  | -2.47887 | H  | -3.26143 | -6.90134 | -0.33502 |

|                                              |                |          |          |    |          |          |          |
|----------------------------------------------|----------------|----------|----------|----|----------|----------|----------|
| H                                            | -1.51462       | -8.10726 | -1.63346 | H  | -6.70611 | -1.70223 | -1.03212 |
| C                                            | 0.59123        | -3.35149 | 1.68037  | H  | -4.80399 | -0.32784 | -4.63933 |
| H                                            | 1.55866        | -3.69277 | 1.30155  | H  | -6.81756 | -1.21558 | -3.46979 |
| H                                            | 0.73641        | -2.37545 | 2.15451  | C  | -2.15084 | -0.93332 | 1.06876  |
| H                                            | 0.24492        | -4.06211 | 2.43818  | C  | -1.39638 | -2.06353 | 1.41586  |
| Thermal correction to Energy=                | 0.794638       |          |          | C  | -3.05325 | -0.4096  | 2.01269  |
| Thermal correction to Enthalpy=              | 0.795582       |          |          | C  | -1.54893 | -2.66862 | 2.66601  |
| Thermal correction to Gibbs Free Energy=     | 0.654032       |          |          | H  | -0.67251 | -2.45492 | 0.70479  |
| Sum of electronic and zero-point Energies=   | -3138.993738   |          |          | C  | -3.20424 | -1.01269 | 3.2612   |
| Sum of electronic and thermal Energies=      | -3138.944534   |          |          | H  | -3.63229 | 0.47752  | 1.77387  |
| Sum of electronic and thermal Enthalpies=    | -3138.943590   |          |          | C  | -2.45474 | -2.14632 | 3.5891   |
| Sum of electronic and thermal Free Energies= | -3139.085140   |          |          | H  | -0.95067 | -3.53971 | 2.91878  |
| SCF Done: E(RM06) =                          | -3140.01654884 |          |          | H  | -3.90591 | -0.59623 | 3.97919  |
|                                              |                |          |          | H  | -2.57271 | -2.61357 | 4.5633   |
| TS2b''                                       |                |          |          | C  | 2.43448  | -0.9263  | 0.69318  |
| Number of imaginary frequencies=             | 1              |          |          | C  | 1.90786  | -0.41636 | 1.89102  |
| Charge =0                                    | Multiplicity = | 1        |          | C  | 3.20024  | -2.10352 | 0.74434  |
| C                                            | -2.58746       | 3.87233  | -0.96497 | C  | 2.15735  | -1.05299 | 3.10785  |
| C                                            | -2.58412       | 2.4973   | -1.2058  | H  | 1.30536  | 0.4865   | 1.87618  |
| C                                            | -1.99452       | 1.61533  | -0.28814 | C  | 3.447    | -2.73928 | 1.96155  |
| C                                            | -1.39011       | 2.14685  | 0.86338  | H  | 3.61137  | -2.52152 | -0.16967 |
| C                                            | -1.39731       | 3.52064  | 1.10276  | C  | 2.92922  | -2.21513 | 3.14826  |
| C                                            | -1.99909       | 4.38863  | 0.19003  | H  | 1.74486  | -0.63871 | 4.02387  |
| H                                            | -3.05601       | 4.53845  | -1.68455 | H  | 4.04902  | -3.64401 | 1.98141  |
| H                                            | -3.0473        | 2.11665  | -2.10895 | H  | 3.12494  | -2.70948 | 4.09597  |
| H                                            | -2.00664       | 5.45917  | 0.37688  | C  | 3.44883  | -0.42099 | -2.01092 |
| C                                            | 1.24422        | 2.41109  | -1.60753 | C  | 3.25497  | -0.63781 | -3.38324 |
| C                                            | 1.3184         | 3.80453  | -1.55746 | C  | 4.7554   | -0.29035 | -1.51233 |
| C                                            | 1.97732        | 1.63921  | -0.69216 | C  | 4.35652  | -0.74426 | -4.23639 |
| C                                            | 2.10916        | 4.43682  | -0.59723 | H  | 2.24675  | -0.69147 | -3.78678 |
| C                                            | 2.78183        | 2.27894  | 0.26519  | C  | 5.8506   | -0.40775 | -2.3675  |
| C                                            | 2.84005        | 3.67188  | 0.31502  | H  | 4.92228  | -0.10684 | -0.45487 |
| H                                            | 2.16082        | 5.52208  | -0.56034 | C  | 5.65268  | -0.63792 | -3.73169 |
| H                                            | 3.36449        | 1.69651  | 0.97243  | H  | 4.19296  | -0.91109 | -5.29738 |
| H                                            | 3.46311        | 4.15799  | 1.06159  | H  | 6.85772  | -0.31712 | -1.96871 |
| P                                            | 1.96768        | -0.18865 | -0.93102 | H  | 6.50731  | -0.7274  | -4.39737 |
| C                                            | -3.52778       | -0.54908 | -1.4846  | P  | -1.9258  | -0.20601 | -0.61671 |
| C                                            | -4.66182       | -1.06171 | -0.83592 | Pd | 0.01787  | -1.23297 | -1.78881 |
| C                                            | -3.58873       | -0.29985 | -2.86857 | C  | -1.2956  | -2.85817 | -2.61813 |
| C                                            | -5.83832       | -1.30143 | -1.54982 | H  | -1.80123 | -2.40601 | -3.46402 |
| H                                            | -4.63567       | -1.28423 | 0.22503  | H  | -1.90652 | -3.09056 | -1.75119 |
| C                                            | -4.77273       | -0.53033 | -3.57199 | C  | -0.09418 | -3.54873 | -2.79443 |
| H                                            | -2.7032        | 0.05053  | -3.39878 | H  | 1.11881  | -2.23729 | -2.3463  |
| C                                            | -5.90014       | -1.03006 | -2.91713 | H  | 0.22594  | -4.19183 | -1.97618 |

|                                                           |          |          |          |   |          |          |          |
|-----------------------------------------------------------|----------|----------|----------|---|----------|----------|----------|
| Cl                                                        | -0.33799 | 0.29414  | -4.14684 | H | 4.09714  | 2.85522  | -0.08513 |
| H                                                         | 0.63471  | 1.92368  | -2.36677 | H | 4.49374  | 5.12849  | -0.9143  |
| H                                                         | -0.92661 | 1.48562  | 1.58929  | P | 1.99462  | 0.74836  | -0.86155 |
| H                                                         | -0.92899 | 3.91129  | 2.00217  | C | -3.16842 | -0.74348 | -1.49754 |
| H                                                         | 0.74933  | 4.39251  | -2.27171 | C | -4.29597 | -1.36398 | -0.94112 |
| C                                                         | 0.56199  | -3.83772 | -4.0913  | C | -3.29454 | -0.1235  | -2.74815 |
| C                                                         | 1.35578  | -4.99225 | -4.18798 | C | -5.51653 | -1.35266 | -1.62349 |
| C                                                         | 0.38383  | -3.03156 | -5.22916 | H | -4.22658 | -1.87726 | 0.00933  |
| C                                                         | 1.94017  | -5.35529 | -5.401   | C | -4.50807 | -0.10129 | -3.41955 |
| H                                                         | 1.50424  | -5.61636 | -3.30899 | H | -2.41801 | 0.31872  | -3.19763 |
| C                                                         | 0.97816  | -3.39448 | -6.43598 | C | -5.62757 | -0.71789 | -2.86122 |
| H                                                         | -0.16898 | -2.09872 | -5.15066 | H | -6.38134 | -1.84841 | -1.18496 |
| C                                                         | 1.74978  | -4.55709 | -6.53029 | H | -4.58023 | 0.38488  | -4.38858 |
| H                                                         | 2.544    | -6.25681 | -5.46192 | H | -6.57414 | -0.71052 | -3.39066 |
| H                                                         | 0.84255  | -2.75891 | -7.30691 | C | -1.54126 | -2.03885 | 0.5977   |
| H                                                         | 2.20631  | -4.83432 | -7.47693 | C | -0.63643 | -3.08896 | 0.40951  |
| Thermal correction to Energy= 0.740150                    |          |          |          | C | -2.4112  | -2.08814 | 1.7061   |
| Thermal correction to Enthalpy= 0.741094                  |          |          |          | C | -0.60907 | -4.17851 | 1.28379  |
| Thermal correction to Gibbs Free Energy= 0.609154         |          |          |          | H | 0.05598  | -3.05168 | -0.42552 |
| Sum of electronic and zero-point Energies= -2969.112775   |          |          |          | C | -2.38353 | -3.17348 | 2.57964  |
| Sum of electronic and thermal Energies= -2969.067355      |          |          |          | H | -3.10435 | -1.27464 | 1.89744  |
| Sum of electronic and thermal Enthalpies= -2969.066411    |          |          |          | C | -1.48703 | -4.22531 | 2.36846  |
| Sum of electronic and thermal Free Energies= -2969.198351 |          |          |          | H | 0.10232  | -4.98424 | 1.11697  |
| SCF Done: E(RM06) = -2970.124833                          |          |          |          | H | -3.06342 | -3.20259 | 3.42757  |
|                                                           |          |          |          | H | -1.46117 | -5.06496 | 3.05531  |
| Int3b''                                                   |          |          |          | C | 1.97672  | 0.76479  | 0.99263  |
| Number of imaginary frequencies=0                         |          |          |          | C | 1.94373  | 1.945    | 1.74931  |
| Charge =0 Multiplicity = 1                                |          |          |          | C | 1.94559  | -0.46872 | 1.67734  |
| C                                                         | -2.57361 | 3.16879  | 0.58301  | C | 1.92696  | 1.89777  | 3.14408  |
| C                                                         | -2.3845  | 2.00285  | -0.15266 | H | 1.94661  | 2.91105  | 1.24941  |
| C                                                         | -1.7878  | 0.86694  | 0.4255   | C | 1.91593  | -0.51322 | 3.0719   |
| C                                                         | -1.36939 | 0.95439  | 1.77     | H | 1.96174  | -1.39686 | 1.11983  |
| C                                                         | -1.57005 | 2.12691  | 2.50932  | C | 1.91354  | 0.67151  | 3.81141  |
| C                                                         | -2.1715  | 3.23379  | 1.91994  | H | 1.92306  | 2.82327  | 3.71012  |
| H                                                         | -3.04186 | 4.02898  | 0.11133  | H | 1.90051  | -1.47809 | 3.5797   |
| H                                                         | -2.719   | 1.97457  | -1.18507 | H | 1.9042   | 0.63884  | 4.89645  |
| H                                                         | -2.32531 | 4.14276  | 2.49834  | C | 3.58528  | -0.17386 | -1.175   |
| C                                                         | 1.56877  | 3.00225  | -2.34783 | C | 3.80304  | -0.63417 | -2.48141 |
| C                                                         | 1.82353  | 4.33733  | -2.84628 | C | 4.5771   | -0.37279 | -0.20548 |
| C                                                         | 2.39733  | 2.48377  | -1.34673 | C | 4.99427  | -1.28241 | -2.80802 |
| C                                                         | 2.859    | 5.104    | -2.3229  | H | 3.0527   | -0.4633  | -3.24538 |
| C                                                         | 3.44101  | 3.25505  | -0.84248 | C | 5.76421  | -1.02928 | -0.53899 |
| C                                                         | 3.66876  | 4.55531  | -1.32097 | H | 4.42766  | -0.02955 | 0.81179  |
| H                                                         | 3.0563   | 6.10968  | -2.70269 | C | 5.9765   | -1.48645 | -1.84184 |

|                                                           |          |          |          |   |          |          |          |
|-----------------------------------------------------------|----------|----------|----------|---|----------|----------|----------|
| H                                                         | 5.14874  | -1.63071 | -3.82519 | C | -3.6892  | 4.53835  | 1.94855  |
| H                                                         | 6.52527  | -1.18032 | 0.21932  | H | -5.20056 | 3.95112  | 0.52647  |
| H                                                         | 6.90231  | -1.99754 | -2.09564 | H | -4.26152 | 1.69265  | 0.17355  |
| P                                                         | -1.53437 | -0.65302 | -0.61366 | H | -4.1031  | 5.53155  | 2.10195  |
| Pd                                                        | 0.22042  | -0.54265 | -2.17785 | C | 1.55185  | 1.64193  | -3.00184 |
| C                                                         | -0.83011 | -2.01204 | -3.18458 | C | 1.16941  | 2.96071  | -3.24886 |
| H                                                         | -1.22813 | -1.53093 | -4.07677 | C | 2.26388  | 1.32468  | -1.83182 |
| H                                                         | -1.66211 | -2.48425 | -2.63087 | C | 1.484    | 3.97065  | -2.33647 |
| C                                                         | 0.25098  | -3.09077 | -3.51659 | C | 2.5778   | 2.34281  | -0.91776 |
| H                                                         | 1.34243  | -2.60658 | -3.72652 | C | 2.18795  | 3.65937  | -1.17235 |
| H                                                         | 0.33363  | -3.72859 | -2.62632 | H | 1.17785  | 4.99529  | -2.52988 |
| Cl                                                        | 0.86094  | 0.19463  | -4.38982 | H | 3.1189   | 2.11208  | -0.00592 |
| H                                                         | 0.84209  | 2.46294  | -2.93591 | H | 2.43305  | 4.43941  | -0.4565  |
| H                                                         | -0.87428 | 0.1211   | 2.2434   | P | 2.7809   | -0.4229  | -1.56811 |
| H                                                         | -1.24129 | 2.15972  | 3.54679  | C | -2.61019 | -0.34894 | -0.1983  |
| H                                                         | 1.21772  | 4.73225  | -3.65994 | C | -3.77636 | -1.13096 | -0.20537 |
| C                                                         | -0.02128 | -3.94181 | -4.75762 | C | -1.97634 | -0.07466 | -1.42329 |
| C                                                         | -0.64233 | -5.19618 | -4.69479 | C | -4.2973  | -1.61752 | -1.40725 |
| C                                                         | 0.38967  | -3.43292 | -6.02314 | H | -4.27696 | -1.36422 | 0.72964  |
| C                                                         | -0.87701 | -5.94076 | -5.85459 | C | -2.4993  | -0.55641 | -2.62522 |
| H                                                         | -0.9383  | -5.59325 | -3.72725 | H | -1.06433 | 0.51748  | -1.43893 |
| C                                                         | 0.14592  | -4.1811  | -7.17657 | C | -3.66211 | -1.33083 | -2.6178  |
| H                                                         | 0.80145  | -2.5383  | -5.91892 | H | -5.20002 | -2.22327 | -1.39597 |
| C                                                         | -0.48835 | -5.42581 | -7.09502 | H | -1.98214 | -0.35086 | -3.55805 |
| H                                                         | -1.36013 | -6.91239 | -5.788   | H | -4.06464 | -1.71722 | -3.55035 |
| H                                                         | 0.45688  | -3.79505 | -8.13967 | C | -2.58428 | -0.69948 | 2.67465  |
| H                                                         | -0.66481 | -6.00265 | -7.99919 | C | -1.98022 | -1.93431 | 2.97122  |
| Thermal correction to Energy= 0.746533                    |          |          |          | C | -3.70028 | -0.30036 | 3.42631  |
| Thermal correction to Enthalpy= 0.747477                  |          |          |          | C | -2.49058 | -2.75505 | 3.97712  |
| Thermal correction to Gibbs Free Energy= 0.614457         |          |          |          | H | -1.10563 | -2.25669 | 2.41097  |
| Sum of electronic and zero-point Energies= -2969.147750   |          |          |          | C | -4.20324 | -1.11798 | 4.44149  |
| Sum of electronic and thermal Energies= -2969.102402      |          |          |          | H | -4.17798 | 0.65292  | 3.22148  |
| Sum of electronic and thermal Enthalpies= -2969.101458    |          |          |          | C | -3.60283 | -2.34741 | 4.71769  |
| Sum of electronic and thermal Free Energies= -2969.234479 |          |          |          | H | -2.01322 | -3.70844 | 4.18854  |
| SCF Done: E(RM06) = -2970.156387                          |          |          |          | H | -5.06748 | -0.79249 | 5.01518  |
|                                                           |          |          |          | H | -3.99566 | -2.98193 | 5.50788  |
| TS4b''                                                    |          |          |          | C | 3.34486  | -0.48873 | 0.18305  |
| Number of imaginary frequencies=1                         |          |          |          | C | 2.37865  | -0.38628 | 1.19923  |
| Charge =0 Multiplicity = 1                                |          |          |          | C | 4.69106  | -0.66271 | 0.53521  |
| C                                                         | -4.30429 | 3.65101  | 1.06355  | C | 2.75808  | -0.44284 | 2.53922  |
| C                                                         | -3.77417 | 2.37409  | 0.86416  | H | 1.32799  | -0.25527 | 0.95175  |
| C                                                         | -2.61595 | 1.96717  | 1.54414  | C | 5.0641   | -0.72988 | 1.88003  |
| C                                                         | -1.99887 | 2.87524  | 2.42167  | H | 5.44988  | -0.74556 | -0.23568 |
| C                                                         | -2.53482 | 4.1461   | 2.63034  | C | 4.10123  | -0.61821 | 2.88322  |



|                                            |              |          |          |                                              |                            |
|--------------------------------------------|--------------|----------|----------|----------------------------------------------|----------------------------|
| H                                          | 1.99985      | -0.35845 | 3.31281  | Sum of electronic and thermal Energies=      | -3082.404831               |
| H                                          | 6.11022      | -0.86872 | 2.13954  | Sum of electronic and thermal Enthalpies=    | -3082.403887               |
| H                                          | 4.3939       | -0.67105 | 3.92846  | Sum of electronic and thermal Free Energies= | -3082.551189               |
| C                                          | 4.29766      | -0.63643 | -2.57964 | SCF Done: E(RM06) =                          | -3083.43051                |
| C                                          | 4.57263      | -1.8914  | -3.14132 |                                              |                            |
| C                                          | 5.19572      | 0.42258  | -2.78818 | Int5b''                                      |                            |
| C                                          | 5.73629      | -2.08935 | -3.8854  | Number of imaginary frequencies=             | 0                          |
| H                                          | 3.86361      | -2.70387 | -3.01473 | Charge =                                     | 0 Multiplicity = 1         |
| C                                          | 6.35618      | 0.22161  | -3.53595 | C                                            | -4.28184 3.65831 1.08986   |
| H                                          | 4.98559      | 1.40439  | -2.37417 | C                                            | -3.76323 2.37665 0.89073   |
| C                                          | 6.62879      | -1.0345  | -4.08317 | C                                            | -2.6077 1.96004 1.56955    |
| H                                          | 5.93601      | -3.06379 | -4.32213 | C                                            | -1.98145 2.86333 2.44544   |
| H                                          | 7.04339      | 1.048    | -3.69604 | C                                            | -2.50584 4.1391 2.6537     |
| H                                          | 7.53026      | -1.18725 | -4.67049 | C                                            | -3.65769 4.54093 1.97324   |
| P                                          | -1.80657     | 0.31483  | 1.33287  | H                                            | -5.17623 3.96583 0.55384   |
| Cl                                         | 1.03742      | -1.62003 | -4.48572 | H                                            | -4.25754 1.69908 0.20123   |
| H                                          | 1.30138      | 0.85719  | -3.71133 | H                                            | -4.06262 5.53784 2.12644   |
| H                                          | -1.08907     | 2.58414  | 2.94198  | C                                            | 1.5511 1.6024 -3.0323      |
| H                                          | -2.04603     | 4.83314  | 3.31638  | C                                            | 1.16506 2.91582 -3.29792   |
| H                                          | 0.61932      | 3.196    | -4.1559  | C                                            | 2.25776 1.30162 -1.85542   |
| Pd                                         | 1.10429      | -2.00648 | -2.08245 | C                                            | 1.47068 3.93912 -2.39736   |
| C                                          | 0.63469      | -2.8911  | -0.50935 | C                                            | 2.56503 2.33314 -0.95355   |
| O                                          | 0.58009      | -3.27217 | 0.59043  | C                                            | 2.17156 3.64658 -1.22659   |
| C                                          | -0.51024     | -3.7558  | -1.9158  | H                                            | 1.16235 4.95957 -2.60527   |
| C                                          | -0.00576     | -5.1976  | -1.97356 | H                                            | 3.10395 2.11706 -0.03683   |
| H                                          | 0.9127       | -5.23759 | -2.57006 | H                                            | 2.41206 4.43712 -0.51996   |
| H                                          | 0.24338      | -5.55081 | -0.96608 | P                                            | 2.78319 -0.4406 -1.56073   |
| H                                          | -1.39887     | -3.6122  | -1.29986 | C                                            | -2.62351 -0.35489 -0.17265 |
| H                                          | -0.70614     | -3.34179 | -2.90777 | C                                            | -3.78783 -1.13957 -0.17979 |
| C                                          | -1.05845     | -6.10348 | -2.58739 | C                                            | -1.99619 -0.07035 -1.39875 |
| C                                          | -1.17324     | -6.22279 | -3.98002 | C                                            | -4.31341 -1.61896 -1.38254 |
| C                                          | -1.95699     | -6.81024 | -1.77701 | H                                            | -4.28362 -1.38038 0.75581  |
| C                                          | -2.15974     | -7.02993 | -4.5472  | C                                            | -2.52482 -0.54372 -2.60136 |
| H                                          | -0.48309     | -5.67911 | -4.62178 | H                                            | -1.08524 0.52343 -1.41493  |
| C                                          | -2.94539     | -7.61852 | -2.34151 | C                                            | -3.68548 -1.32136 -2.59413 |
| H                                          | -1.87724     | -6.73029 | -0.69476 | H                                            | -5.2144 -2.22724 -1.3711   |
| C                                          | -3.04955     | -7.73062 | -3.72921 | H                                            | -2.01495 -0.32758 -3.53582 |
| H                                          | -2.23131     | -7.11424 | -5.62847 | H                                            | -4.09201 -1.70141 -3.52753 |
| H                                          | -3.63045     | -8.16362 | -1.69713 | C                                            | -2.60358 -0.7057 2.70131   |
| H                                          | -3.81637     | -8.36173 | -4.17058 | C                                            | -2.00824 -1.94295 3.00514  |
| Thermal correction to Energy=              | 0.755534     |          |          | C                                            | -3.72092 -0.29751 3.44621  |
| Thermal correction to Enthalpy=            | 0.756478     |          |          | C                                            | -2.52825 -2.75721 4.0114   |
| Thermal correction to Gibbs Free Energy=   | 0.609176     |          |          | H                                            | -1.13294 -2.27237 2.44797  |
| Sum of electronic and zero-point Energies= | -3082.453196 |          |          | C                                            | -4.23354 -1.10859 4.46175  |

|    |          |          |          |                                                           |          |          |          |          |
|----|----------|----------|----------|-----------------------------------------------------------|----------|----------|----------|----------|
| H  | -4.19212 | 0.65777  | 3.23573  | C                                                         | -1.91493 | -6.81487 | -1.81886 |          |
| C  | -3.64164 | -2.34055 | 4.74511  | C                                                         | -2.1578  | -6.99324 | -4.5881  |          |
| H  | -2.05753 | -3.71263 | 4.22843  | H                                                         | -0.49796 | -5.62186 | -4.66571 |          |
| H  | -5.0986  | -0.77607 | 5.03012  | C                                                         | -2.90368 | -7.62602 | -2.37868 |          |
| H  | -4.04195 | -2.97    | 5.53559  | H                                                         | -1.81758 | -6.7549  | -0.73699 |          |
| C  | 3.34729  | -0.47712 | 0.1881   | C                                                         | -3.02793 | -7.71633 | -3.76825 |          |
| C  | 2.3787   | -0.36966 | 1.2016   | H                                                         | -2.24677 | -7.06006 | -5.66919 |          |
| C  | 4.69419  | -0.63272 | 0.54257  | H                                                         | -3.57139 | -8.19091 | -1.73339 |          |
| C  | 2.75608  | -0.4042  | 2.54054  | H                                                         |          | -3.79265 | -8.34965 | -4.20612 |
| H  | 1.32503  | -0.25653 | 0.94907  | Thermal correction to Energy= 0.757760                    |          |          |          |          |
| C  | 5.06546  | -0.68012 | 1.88882  | Thermal correction to Enthalpy= 0.758704                  |          |          |          |          |
| H  | 5.45499  | -0.71886 | -0.226   | Thermal correction to Gibbs Free Energy= 0.611320         |          |          |          |          |
| C  | 4.10006  | -0.5642  | 2.889    | Sum of electronic and zero-point Energies= -3082.470900   |          |          |          |          |
| H  | 1.99575  | -0.31842 | 3.31399  | Sum of electronic and thermal Energies= -3082.422410      |          |          |          |          |
| H  | 6.11226  | -0.8047  | 2.1517   | Sum of electronic and thermal Enthalpies= -3082.421466    |          |          |          |          |
| H  | 4.39135  | -0.60167 | 3.93529  | Sum of electronic and thermal Free Energies= -3082.568850 |          |          |          |          |
| C  | 4.30106  | -0.65803 | -2.5727  | SCF Done: E(RM06) = -3083.455298                          |          |          |          |          |
| C  | 4.58784  | -1.92002 | -3.1148  |                                                           |          |          |          |          |
| C  | 5.19423  | 0.40208  | -2.79347 | TS6b''                                                    |          |          |          |          |
| C  | 5.75389  | -2.12122 | -3.8536  | Number of imaginary frequencies=1                         |          |          |          |          |
| H  | 3.88231  | -2.73378 | -2.97771 | Charge =0 Multiplicity = 1                                |          |          |          |          |
| C  | 6.35928  | 0.19792  | -3.53621 | P                                                         | -1.29077 | 0.73497  | 1.04284  |          |
| H  | 4.97849  | 1.38894  | -2.39466 | P                                                         | 2.74459  | 0.91727  | 0.20464  |          |
| C  | 6.63918  | -1.06502 | -4.06595 | C                                                         | -1.11773 | 1.02711  | 2.86656  |          |
| H  | 5.95925  | -3.10117 | -4.27514 | C                                                         | -0.21272 | 0.21888  | 3.5728   |          |
| H  | 7.04033  | 1.02522  | -3.70777 | C                                                         | -1.84168 | 2.00077  | 3.57298  |          |
| H  | 7.54476  | -1.21987 | -4.64702 | C                                                         | -0.04895 | 0.36393  | 4.95157  |          |
| P  | -1.81433 | 0.29974  | 1.35959  | C                                                         | -1.67104 | 2.15246  | 4.95007  |          |
| Cl | 1.08127  | -1.6853  | -4.47463 | C                                                         | -0.77848 | 1.33176  | 5.64363  |          |
| H  | 1.30847  | 0.80713  | -3.73271 | C                                                         | -2.89299 | -0.19651 | 0.92674  |          |
| H  | -1.07362 | 2.56464  | 2.96488  | C                                                         | -3.47411 | -0.36562 | -0.34518 |          |
| H  | -2.01006 | 4.82237  | 3.33848  | C                                                         | -3.49732 | -0.81861 | 2.02878  |          |
| H  | 0.61998  | 3.13893  | -4.21024 | C                                                         | -4.62808 | -1.13336 | -0.50254 |          |
| Pd | 1.11522  | -2.02596 | -2.06245 | C                                                         | -4.65097 | -1.59329 | 1.86621  |          |
| C  | 0.54982  | -2.94673 | -0.53187 | C                                                         | -5.21968 | -1.75392 | 0.60319  |          |
| O  | 0.51551  | -3.28569 | 0.59285  | C                                                         | -1.78247 | 2.38468  | 0.36202  |          |
| C  | -0.49685 | -3.75459 | -1.83211 | C                                                         | -3.07762 | 2.91331  | 0.50356  |          |
| C  | 0.01925  | -5.19067 | -2.00618 | C                                                         | -0.81929 | 3.13928  | -0.32203 |          |
| H  | 0.91587  | -5.17762 | -2.63512 | C                                                         | -3.38764 | 4.17562  | -0.00372 |          |
| H  | 0.30814  | -5.59373 | -1.02947 | C                                                         | -1.12957 | 4.40309  | -0.82849 |          |
| H  | -1.42105 | -3.67581 | -1.25333 | C                                                         | -2.41281 | 4.92572  | -0.66657 |          |
| H  | -0.67798 | -3.27122 | -2.80144 | C                                                         | 3.1913   | 1.73559  | 1.80555  |          |
| C  | -1.03839 | -6.08342 | -2.63115 | C                                                         | 2.29435  | 2.67282  | 2.34825  |          |
| C  | -1.17324 | -6.18098 | -4.02331 | C                                                         | 4.35054  | 1.42065  | 2.52955  |          |

|   |          |          |          |                                                           |          |          |          |
|---|----------|----------|----------|-----------------------------------------------------------|----------|----------|----------|
| C | 2.56005  | 3.29184  | 3.56818  | H                                                         | -0.64651 | 1.45271  | 6.71568  |
| C | 4.60919  | 2.03239  | 3.75963  | Pd                                                        | 0.59862  | -0.32157 | 0.14292  |
| C | 3.7193   | 2.9714   | 4.28034  | C                                                         | -0.04788 | -2.3765  | -0.43868 |
| C | 4.23559  | -0.11637 | -0.16927 | H                                                         | -0.91397 | -1.0216  | -2.49618 |
| C | 5.444    | 0.43164  | -0.63165 | Cl                                                        | -1.03247 | 0.04298  | -3.39111 |
| C | 4.14897  | -1.50329 | 0.02645  | N                                                         | -0.92236 | -2.33936 | -1.60487 |
| C | 6.54434  | -0.38963 | -0.87877 | H                                                         | -1.8993  | -2.50656 | -1.36773 |
| C | 5.25412  | -2.32242 | -0.21809 | H                                                         | -0.61531 | -3.0282  | -2.29315 |
| C | 6.45268  | -1.76833 | -0.66861 | O                                                         | 1.19422  | -2.31261 | -0.67307 |
| C | 2.88024  | 2.29379  | -1.02416 | C                                                         | -0.58836 | -3.12638 | 0.77587  |
| C | 3.58836  | 3.4828   | -0.78746 | H                                                         | -1.59215 | -2.76707 | 1.02642  |
| C | 2.23353  | 2.12247  | -2.26011 | C                                                         | -0.64812 | -4.66739 | 0.56832  |
| C | 3.65562  | 4.47417  | -1.76907 | H                                                         | 0.06553  | -2.89942 | 1.62273  |
| C | 2.30773  | 3.11232  | -3.2413  | H                                                         | -1.15888 | -5.09077 | 1.44321  |
| C | 3.01851  | 4.29014  | -2.99822 | H                                                         | -1.28509 | -4.89391 | -0.29665 |
| H | 4.20595  | 5.39066  | -1.5713  | C                                                         | 0.70096  | -5.33276 | 0.39822  |
| H | 1.79742  | 2.96405  | -4.18895 | C                                                         | 1.13261  | -5.79368 | -0.85144 |
| H | 3.07052  | 5.06355  | -3.76026 | C                                                         | 1.55555  | -5.49917 | 1.49813  |
| H | -3.02426 | 0.10765  | -1.21469 | C                                                         | 2.38421  | -6.3933  | -1.00562 |
| H | -3.07167 | -0.69844 | 3.02007  | H                                                         | 0.48017  | -5.68609 | -1.7158  |
| H | 1.65138  | 1.22383  | -2.44919 | C                                                         | 2.80722  | -6.09607 | 1.3511   |
| H | 4.08087  | 3.63965  | 0.16757  | H                                                         | 1.23443  | -5.15974 | 2.48103  |
| H | 7.47202  | 0.04698  | -1.24019 | C                                                         | 3.22744  | -6.54446 | 0.09571  |
| H | 5.16443  | -3.39554 | -0.07111 | H                                                         | 2.69823  | -6.74232 | -1.98583 |
| H | 7.31     | -2.40678 | -0.86683 | H                                                         | 3.45256  | -6.21782 | 2.21735  |
| H | 3.20627  | -1.94596 | 0.32944  | H                                                         | 4.20025  | -7.01498 | -0.02002 |
| H | 5.52523  | 1.50026  | -0.80708 | Thermal correction to Energy= 0.795161                    |          |          |          |
| H | 1.8544   | 4.01489  | 3.96839  | Thermal correction to Enthalpy= 0.796105                  |          |          |          |
| H | 5.51269  | 1.77431  | 4.3064   | Thermal correction to Gibbs Free Energy= 0.652486         |          |          |          |
| H | 3.92329  | 3.44792  | 5.23569  | Sum of electronic and zero-point Energies= -3138.990755   |          |          |          |
| H | 5.05667  | 0.69858  | 2.13353  | Sum of electronic and thermal Energies= -3138.941505      |          |          |          |
| H | 1.38038  | 2.91917  | 1.81514  | Sum of electronic and thermal Enthalpies= -3138.940561    |          |          |          |
| H | -4.39391 | 4.56996  | 0.11261  | Sum of electronic and thermal Free Energies= -3139.084179 |          |          |          |
| H | -0.36872 | 4.96564  | -1.36243 | SCF Done: E(RM06) = -3140.01527462                        |          |          |          |
| H | -2.65843 | 5.90636  | -1.06573 |                                                           |          |          |          |
| H | 0.17007  | 2.72549  | -0.48204 | TS4c''                                                    |          |          |          |
| H | -3.85241 | 2.33241  | 0.99546  | Number of imaginary frequencies=1                         |          |          |          |
| H | -5.06945 | -1.24093 | -1.4903  | Charge =0 Multiplicity = 1                                |          |          |          |
| H | -5.10571 | -2.06536 | 2.73351  | P                                                         | -1.1617  | 0.60218  | 1.30611  |
| H | -6.11816 | -2.35252 | 0.47898  | P                                                         | 2.48352  | 1.38427  | -0.0464  |
| H | 0.37796  | -0.51319 | 3.02749  | C                                                         | -0.37045 | 0.60701  | 2.97877  |
| H | -2.53283 | 2.65297  | 3.04899  | C                                                         | 0.58511  | -0.39206 | 3.22871  |
| H | 0.6588   | -0.26932 | 5.47977  | C                                                         | -0.67607 | 1.5181   | 4.00151  |
| H | -2.23578 | 2.91473  | 5.48083  | C                                                         | 1.19202  | -0.50055 | 4.48154  |

|   |          |          |          |                               |          |          |          |          |
|---|----------|----------|----------|-------------------------------|----------|----------|----------|----------|
| C | -0.05479 | 1.41904  | 5.24731  | H                             | 0.94818  | 5.02272  | 2.98021  |          |
| C | 0.87277  | 0.40486  | 5.49411  | H                             | 5.14333  | 5.07696  | 2.02141  |          |
| C | -2.62309 | -0.51258 | 1.57184  | H                             | 3.19683  | 6.0637   | 3.21675  |          |
| C | -3.76984 | -0.34652 | 0.776    | H                             | 4.84736  | 3.07876  | 0.60488  |          |
| C | -2.60821 | -1.54698 | 2.51921  | H                             | 0.65569  | 3.0214   | 1.56996  |          |
| C | -4.87917 | -1.17624 | 0.94325  | H                             | -4.46623 | 4.22901  | 2.3365   |          |
| C | -3.71633 | -2.38251 | 2.67849  | H                             | -1.89685 | 4.87397  | -1.06613 |          |
| C | -4.85708 | -2.19693 | 1.89706  | H                             | -3.72631 | 5.66613  | 0.44617  |          |
| C | -1.99095 | 2.23574  | 1.08894  | H                             | -0.81196 | 2.71924  | -0.66206 |          |
| C | -3.04464 | 2.67131  | 1.91529  | H                             | -3.40493 | 2.03735  | 2.72021  |          |
| C | -1.59537 | 3.04733  | 0.01496  | H                             | -5.76154 | -1.02212 | 0.32784  |          |
| C | -3.65601 | 3.90369  | 1.68912  | H                             | -3.6872  | -3.17326 | 3.42336  |          |
| C | -2.21669 | 4.27726  | -0.21733 | H                             | -5.72235 | -2.84078 | 2.02918  |          |
| C | -3.24056 | 4.71033  | 0.62437  | H                             | 0.86581  | -1.08183 | 2.43732  |          |
| C | 2.72967  | 2.88664  | 1.00627  | H                             | -1.3904  | 2.31521  | 3.82779  |          |
| C | 1.64142  | 3.45549  | 1.67821  | H                             | 1.92859  | -1.27999 | 4.65253  |          |
| C | 3.99409  | 3.48998  | 1.13556  | H                             | -0.29832 | 2.13663  | 6.02643  |          |
| C | 1.80724  | 4.59257  | 2.47278  | H                             | 1.35127  | 0.32801  | 6.46677  |          |
| C | 4.16039  | 4.62198  | 1.93176  | Pd                            | 0.31411  | 0.14232  | -0.64719 |          |
| C | 3.06652  | 5.17624  | 2.60304  | C                             | 1.08649  | -0.11383 | -2.50341 |          |
| C | 3.35074  | 0.02862  | 0.869    | H                             | 0.28449  | 2.01295  | -3.42211 |          |
| C | 3.34961  | -1.2583  | 0.29536  | Cl                            | -0.05437 | 3.51009  | -3.39179 |          |
| C | 3.96773  | 0.21525  | 2.11355  | N                             | 0.35407  | 0.67552  | -3.54359 |          |
| C | 3.96026  | -2.32501 | 0.95586  | H                             | -0.64168 | 0.45306  | -3.5018  |          |
| C | 4.57552  | -0.8579  | 2.77154  | H                             | 0.72121  | 0.4466   | -4.47399 |          |
| C | 4.57265  | -2.12921 | 2.19713  | O                             | 2.043    | -0.74308 | -2.89371 |          |
| C | 3.63757  | 1.76197  | -1.44485 | C                             | -0.72876 | -1.65748 | -1.14285 |          |
| C | 4.84973  | 1.08859  | -1.65012 | H                             | -1.09442 | -2.00986 | -0.17387 |          |
| C | 3.2732   | 2.79374  | -2.32481 | C                             | -1.87673 | -1.69689 | -2.16373 |          |
| C | 5.68099  | 1.44195  | -2.71615 | H                             | -1.55824 | -1.28103 | -3.12777 |          |
| C | 4.10646  | 3.14372  | -3.38674 | H                             | -2.7137  | -1.08147 | -1.81332 |          |
| C | 5.31338  | 2.46909  | -3.58569 | H                             | 0.07474  | -2.32872 | -1.46257 |          |
| H | 6.61662  | 0.90886  | -2.86429 | C                             | -2.35311 | -3.11899 | -2.41426 |          |
| H | 3.80192  | 3.9396   | -4.06073 | C                             | -3.30516 | -3.72353 | -1.581   |          |
| H | 5.96093  | 2.73965  | -4.4157  | C                             | -1.81816 | -3.87394 | -3.46797 |          |
| H | -3.80809 | 0.44788  | 0.03666  | C                             | -3.71132 | -5.04146 | -1.79626 |          |
| H | -1.7387  | -1.69539 | 3.15119  | H                             | -3.73174 | -3.15494 | -0.75892 |          |
| H | 2.33168  | 3.3205   | -2.20062 | C                             | -2.22112 | -5.19222 | -3.68674 |          |
| H | 5.1495   | 0.28519  | -0.98613 | H                             | -1.07864 | -3.42126 | -4.12596 |          |
| H | 3.95788  | -3.31011 | 0.49687  | C                             | -3.1713  | -5.78155 | -2.85034 |          |
| H | 5.05239  | -0.69464 | 3.73471  | H                             | -4.45465 | -5.49003 | -1.14146 |          |
| H | 5.04711  | -2.9621  | 2.70953  | H                             | -1.7961  | -5.75707 | -4.51278 |          |
| H | 3.97456  | 1.19596  | 2.5766   | H                             |          | -3.48975 | -6.80682 | -3.02011 |
| H | 2.88921  | -1.41848 | -0.67591 | Thermal correction to Energy= | 0.792789 |          |          |          |

|                                              |                |          |          |    |          |          |          |
|----------------------------------------------|----------------|----------|----------|----|----------|----------|----------|
| Thermal correction to Enthalpy=              | 0.793733       |          |          | C  | 4.21102  | 3.08651  | 0.6855   |
| Thermal correction to Gibbs Free Energy=     | 0.652021       |          |          | C  | 2.37562  | 3.37821  | -0.86698 |
| Sum of electronic and zero-point Energies=   | -3138.958056   |          |          | C  | 4.43     | 4.46611  | 0.68344  |
| Sum of electronic and thermal Energies=      | -3138.908715   |          |          | C  | 2.60421  | 4.75507  | -0.86671 |
| Sum of electronic and thermal Enthalpies=    | -3138.907771   |          |          | C  | 3.62756  | 5.30427  | -0.09112 |
| Sum of electronic and thermal Free Energies= | -3139.049483   |          |          | H  | 5.23135  | 4.88154  | 1.28902  |
| SCF Done: E(RM06) =                          | -3139.98918438 |          |          | H  | 1.97656  | 5.39736  | -1.47898 |
|                                              |                |          |          | H  | 3.79962  | 6.37755  | -0.09127 |
| Int5c''                                      |                |          |          | H  | -1.73631 | -0.66831 | -2.13517 |
| Number of imaginary frequencies=             | 0              |          |          | H  | -4.65733 | -0.35871 | 1.01717  |
| Charge =0                                    | Multiplicity = | 1        |          | H  | 1.57937  | 2.95969  | -1.47628 |
| P                                            | -1.85321       | 0.57949  | 0.47691  | H  | 4.84587  | 2.45179  | 1.29373  |
| P                                            | 2.87787        | 0.69952  | -0.14975 | H  | 6.41815  | 0.76248  | -3.67053 |
| C                                            | -2.46035       | 0.6455   | 2.22311  | H  | 3.27256  | -2.12631 | -4.20128 |
| C                                            | -2.72039       | -0.54714 | 2.91804  | H  | 5.40029  | -1.09565 | -4.97304 |
| C                                            | -2.61307       | 1.86582  | 2.89892  | H  | 2.16732  | -1.296   | -2.14635 |
| C                                            | -3.13513       | -0.51761 | 4.2487   | H  | 5.33123  | 1.56984  | -1.60345 |
| C                                            | -3.02069       | 1.89133  | 4.23436  | H  | 4.13293  | 0.09013  | 4.59779  |
| C                                            | -3.28569       | 0.70171  | 4.91254  | H  | 6.78861  | -1.78209 | 1.77599  |
| C                                            | -3.07796       | -0.43354 | -0.46006 | H  | 6.16565  | -1.27031 | 4.12953  |
| C                                            | -2.71351       | -0.91438 | -1.72903 | H  | 5.41173  | -0.9346  | -0.08622 |
| C                                            | -4.35993       | -0.7192  | 0.03786  | H  | 2.73435  | 0.90901  | 2.74375  |
| C                                            | -3.6164        | -1.66996 | -2.47902 | H  | -4.73251 | 4.35183  | -1.09708 |
| C                                            | -5.25666       | -1.47854 | -0.71628 | H  | -0.74778 | 5.39351  | 0.15469  |
| C                                            | -4.88635       | -1.95735 | -1.97438 | H  | -2.98421 | 6.07607  | -0.70628 |
| C                                            | -2.23917       | 2.33003  | 0.04595  | H  | -0.26843 | 3.01213  | 0.6026   |
| C                                            | -3.49436       | 2.71922  | -0.44068 | H  | -4.26496 | 1.97603  | -0.61868 |
| C                                            | -1.25336       | 3.30667  | 0.25202  | H  | -3.32425 | -2.03091 | -3.46158 |
| C                                            | -3.75822       | 4.06329  | -0.71153 | H  | -6.24441 | -1.69516 | -0.3178  |
| C                                            | -1.5235        | 4.65002  | -0.00756 | H  | -5.58576 | -2.54907 | -2.55938 |
| C                                            | -2.77643       | 5.03088  | -0.49265 | H  | -2.60673 | -1.50587 | 2.42346  |
| C                                            | 3.97782        | 0.05972  | 1.18938  | H  | -2.41967 | 2.80129  | 2.3857   |
| C                                            | 3.63002        | 0.3375   | 2.52344  | H  | -3.33138 | -1.45332 | 4.76424  |
| C                                            | 5.12414        | -0.7083  | 0.9349   | H  | -3.13528 | 2.84649  | 4.74017  |
| C                                            | 4.41743        | -0.13306 | 3.57321  | H  | -3.60551 | 0.72358  | 5.95104  |
| C                                            | 5.9051         | -1.18647 | 1.99027  | Pd | 0.49448  | 0.20057  | -0.03139 |
| C                                            | 5.5565         | -0.89842 | 3.30994  | C  | 0.52626  | -0.51571 | 1.84149  |
| C                                            | 3.69297        | 0.16153  | -1.70975 | C  | 0.11331  | -1.78435 | -0.22027 |
| C                                            | 4.88506        | 0.75118  | -2.16068 | H  | 0.16353  | -1.44904 | -1.26139 |
| C                                            | 3.11651        | -0.87321 | -2.45898 | C  | -1.21306 | -2.49933 | -0.01998 |
| C                                            | 5.49753        | 0.29694  | -3.32876 | H  | 0.95084  | -2.4226  | -0.03032 |
| C                                            | 3.73358        | -1.32887 | -3.62509 | H  | -1.9348  | -1.81042 | 0.36654  |
| C                                            | 4.9247         | -0.74655 | -4.06029 | H  | -1.55509 | -2.88571 | -0.95733 |
| C                                            | 3.17982        | 2.52809  | -0.08783 | C  | -0.80789 | -3.59359 | 0.98502  |

|                                                           |          |          |          |   |          |          |          |
|-----------------------------------------------------------|----------|----------|----------|---|----------|----------|----------|
| C                                                         | 0.29734  | -4.40447 | 0.72539  | C | -1.00461 | 3.99283  | 3.30668  |
| C                                                         | -1.54575 | -3.77399 | 2.15489  | C | -1.36206 | 5.19263  | 2.68712  |
| C                                                         | 0.66416  | -5.39594 | 1.63514  | C | 3.66725  | -0.40062 | 0.1395   |
| H                                                         | 0.87838  | -4.26251 | -0.19737 | C | 4.15494  | 0.01668  | 1.39084  |
| C                                                         | -1.17836 | -4.76507 | 3.06549  | C | 4.4199   | -1.32088 | -0.60368 |
| H                                                         | -2.41676 | -3.13486 | 2.35977  | C | 5.37106  | -0.46125 | 1.87639  |
| C                                                         | -0.07369 | -5.5761  | 2.80576  | C | 5.63688  | -1.80398 | -0.11215 |
| H                                                         | 1.53493  | -6.03554 | 1.43026  | C | 6.11648  | -1.37447 | 1.12562  |
| H                                                         | -1.76006 | -4.9068  | 3.98799  | C | 1.83595  | -0.45065 | -2.1067  |
| H                                                         | 0.21576  | -6.35787 | 3.52294  | C | 2.25175  | 0.16103  | -3.29913 |
| O                                                         | 0.52448  | -1.9278  | 2.06707  | C | 1.18982  | -1.69782 | -2.17935 |
| N                                                         | 0.55138  | 0.41085  | 2.98244  | C | 2.03302  | -0.46219 | -4.53091 |
| H                                                         | -0.0531  | 0.06965  | 3.7023   | C | 0.98509  | -2.32525 | -3.40826 |
| H                                                         | 1.48445  | 0.47963  | 3.3355   | C | 1.40427  | -1.70708 | -4.58882 |
| Thermal correction to Energy= 0.783151                    |          |          |          | C | 2.53438  | 2.05218  | -0.76167 |
| Thermal correction to Enthalpy= 0.784095                  |          |          |          | C | 3.81753  | 2.40612  | -1.21587 |
| Thermal correction to Gibbs Free Energy= 0.648185         |          |          |          | C | 1.59559  | 3.06969  | -0.54113 |
| Sum of electronic and zero-point Energies= -2678.165077   |          |          |          | C | 4.14058  | 3.74109  | -1.46001 |
| Sum of electronic and thermal Energies= -2678.117599      |          |          |          | C | 1.91973  | 4.40648  | -0.78343 |
| Sum of electronic and thermal Enthalpies= -2678.116655    |          |          |          | C | 3.19147  | 4.74453  | -1.24601 |
| Sum of electronic and thermal Free Energies= -2678.252565 |          |          |          | H | 5.13691  | 3.99853  | -1.81017 |
| SCF Done: E(RM06) = -2679.18370651                        |          |          |          | H | 1.17779  | 5.17786  | -0.59642 |
|                                                           |          |          |          | H | 3.44791  | 5.78461  | -1.42991 |
| TS6c''                                                    |          |          |          | H | -0.40923 | 0.95558  | -2.05039 |
| Number of imaginary frequencies=1                         |          |          |          | H | -4.35546 | 2.09292  | -0.77005 |
| Charge =0 Multiplicity = 1                                |          |          |          | H | 0.61197  | 2.82071  | -0.15948 |
| P                                                         | -1.82705 | 1.09887  | 0.50182  | H | 4.56963  | 1.63751  | -1.36805 |
| P                                                         | 2.04556  | 0.29669  | -0.42303 | H | 2.35932  | 0.02702  | -5.44519 |
| C                                                         | -3.4115  | 0.3866   | 1.14943  | H | 0.48904  | -3.29156 | -3.44399 |
| C                                                         | -3.97876 | -0.70477 | 0.46723  | H | 1.23715  | -2.19065 | -5.54761 |
| C                                                         | -4.01048 | 0.82003  | 2.33888  | H | 0.83805  | -2.17098 | -1.26604 |
| C                                                         | -5.11892 | -1.3387  | 0.9583   | H | 2.74206  | 1.12864  | -3.27086 |
| C                                                         | -5.14925 | 0.17842  | 2.83468  | H | 5.73292  | -0.12644 | 2.84472  |
| C                                                         | -5.70692 | -0.90078 | 2.14906  | H | 6.21021  | -2.51323 | -0.70369 |
| C                                                         | -2.32579 | 1.50492  | -1.23596 | H | 7.06252  | -1.75009 | 1.50603  |
| C                                                         | -1.39746 | 1.34051  | -2.27193 | H | 4.06368  | -1.6585  | -1.57164 |
| C                                                         | -3.61357 | 1.97447  | -1.55411 | H | 3.58091  | 0.72326  | 1.9857   |
| C                                                         | -1.73598 | 1.646    | -3.59263 | H | -2.16369 | 6.10041  | 0.90151  |
| C                                                         | -3.95182 | 2.28092  | -2.87196 | H | -0.59474 | 3.99862  | 4.31321  |
| C                                                         | -3.01277 | 2.11841  | -3.89486 | H | -1.23147 | 6.13758  | 3.20817  |
| C                                                         | -1.69914 | 2.74796  | 1.33729  | H | -0.86774 | 1.85008  | 3.12651  |
| C                                                         | -2.05525 | 3.95813  | 0.72182  | H | -2.4617  | 3.96148  | -0.28406 |
| C                                                         | -1.15903 | 2.77738  | 2.63782  | H | -1.00045 | 1.50274  | -4.37938 |
| C                                                         | -1.88392 | 5.17189  | 1.39303  | H | -4.95087 | 2.64265  | -3.10119 |

|                                              |                |          |          |   |          |          |          |
|----------------------------------------------|----------------|----------|----------|---|----------|----------|----------|
| H                                            | -3.28042       | 2.35301  | -4.92185 | C | 0.28604  | 0.07663  | 3.4491   |
| H                                            | -3.53016       | -1.05613 | -0.45912 | C | -1.08446 | 2.03723  | 3.78874  |
| H                                            | -3.58825       | 1.65485  | 2.88749  | C | 0.64485  | 0.0928   | 4.79832  |
| H                                            | -5.5476        | -2.17577 | 0.41296  | C | -0.71788 | 2.05726  | 5.13467  |
| H                                            | -5.59931       | 0.52816  | 3.76008  | C | 0.14189  | 1.08169  | 5.64436  |
| H                                            | -6.59309       | -1.39685 | 2.53589  | C | -2.7613  | 0.07712  | 1.294    |
| Pd                                           | 0.126          | -0.22662 | 1.08335  | C | -3.59807 | 0.0746   | 0.16351  |
| C                                            | -0.80322       | -1.00692 | 2.74887  | C | -3.19468 | -0.58135 | 2.45331  |
| C                                            | 1.2365         | -1.87206 | 2.51351  | C | -4.83937 | -0.55809 | 0.19902  |
| H                                            | 2.16729        | -1.30138 | 2.51036  | C | -4.43788 | -1.22042 | 2.48465  |
| C                                            | 1.35761        | -3.2003  | 1.76555  | C | -5.26326 | -1.20976 | 1.36098  |
| O                                            | -0.89399       | -0.3152  | 3.75782  | C | -1.55757 | 2.57081  | 0.59648  |
| N                                            | -1.60671       | -2.126   | 2.58295  | C | -2.71967 | 3.22195  | 1.0495   |
| H                                            | -2.44658       | -2.12233 | 3.1562   | C | -0.74281 | 3.22535  | -0.33866 |
| H                                            | -1.75255       | -2.43309 | 1.63046  | C | -3.03229 | 4.50559  | 0.60256  |
| H                                            | 0.94122        | -2.0225  | 3.54877  | C | -1.05888 | 4.50885  | -0.79024 |
| H                                            | 0.35752        | -3.60478 | 1.56911  | C | -2.20028 | 5.15371  | -0.31477 |
| H                                            | 1.8417         | -3.04229 | 0.79478  | C | 2.981    | 1.63468  | 1.56585  |
| C                                            | 2.14506        | -4.22764 | 2.56221  | C | 2.31498  | 2.7626   | 2.07639  |
| C                                            | 3.51636        | -4.42227 | 2.34863  | C | 3.89789  | 0.96636  | 2.39019  |
| C                                            | 1.51279        | -4.98412 | 3.56066  | C | 2.57341  | 3.21838  | 3.36786  |
| C                                            | 4.23586        | -5.34775 | 3.10778  | C | 4.14872  | 1.42016  | 3.6878   |
| H                                            | 4.0233         | -3.84236 | 1.58069  | C | 3.49251  | 2.54818  | 4.17893  |
| C                                            | 2.22807        | -5.90871 | 4.32202  | C | 4.0157   | -0.07297 | -0.51219 |
| H                                            | 0.44888        | -4.84041 | 3.73858  | C | 5.2271   | 0.3483   | -1.07947 |
| C                                            | 3.59451        | -6.09504 | 4.09742  | C | 3.86167  | -1.423   | -0.16217 |
| H                                            | 5.29873        | -5.48663 | 2.92388  | C | 6.2672   | -0.56146 | -1.27833 |
| H                                            | 1.71845        | -6.48753 | 5.08868  | C | 4.90847  | -2.32592 | -0.34584 |
| H                                            | 4.153          | -6.81714 | 4.68767  | C | 6.11327  | -1.89789 | -0.9063  |
| Thermal correction to Energy=                | 0.782103       |          |          | C | 3.03347  | 2.60316  | -1.13348 |
| Thermal correction to Enthalpy=              | 0.783048       |          |          | C | 3.9656   | 3.55598  | -0.68376 |
| Thermal correction to Gibbs Free Energy=     | 0.646225       |          |          | C | 2.41366  | 2.7994   | -2.37457 |
| Sum of electronic and zero-point Energies=   | -2678.149026   |          |          | C | 4.26483  | 4.67262  | -1.46446 |
| Sum of electronic and thermal Energies=      | -2678.101867   |          |          | C | 2.71273  | 3.91766  | -3.15586 |
| Sum of electronic and thermal Enthalpies=    | -2678.100922   |          |          | C | 3.63926  | 4.85619  | -2.7012  |
| Sum of electronic and thermal Free Energies= | -2678.237746   |          |          | H | 4.98706  | 5.40097  | -1.10453 |
| SCF Done: E(RM06) =                          | -2679.16414721 |          |          | H | 2.20756  | 4.03822  | -4.10928 |
|                                              |                |          |          | H | 3.87256  | 5.73001  | -3.30408 |
| TS4d''                                       |                |          |          | H | -3.28037 | 0.57818  | -0.74583 |
| Number of imaginary frequencies=             | 1              |          |          | H | -2.56845 | -0.59127 | 3.33955  |
| Charge =0 Multiplicity =                     | 1              |          |          | H | 1.68184  | 2.09135  | -2.74437 |
| P                                            | -1.09154       | 0.8716   | 1.1572   | H | 4.45438  | 3.42921  | 0.27688  |
| P                                            | 2.61814        | 1.084    | -0.16846 | H | 7.19785  | -0.22244 | -1.72583 |
| C                                            | -0.59302       | 1.04049  | 2.93107  | H | 4.76826  | -3.36662 | -0.06801 |

|    |          |          |          |                                              |                |                |          |
|----|----------|----------|----------|----------------------------------------------|----------------|----------------|----------|
| H  | 6.92482  | -2.60409 | -1.06162 | H                                            | 2.57151        | -5.35315       | -0.45865 |
| H  | 2.91735  | -1.77679 | 0.23993  | H                                            | 2.41317        | -5.61163       | 2.01452  |
| H  | 5.36194  | 1.38365  | -1.37373 | Thermal correction to Energy=                | 0.792788       |                |          |
| H  | 2.05243  | 4.09546  | 3.74159  | Thermal correction to Enthalpy=              | 0.793732       |                |          |
| H  | 4.86804  | 0.89251  | 4.30893  | Thermal correction to Gibbs Free Energy=     | 0.653297       |                |          |
| H  | 3.69363  | 2.90399  | 5.18587  | Sum of electronic and zero-point Energies=   | -3138.955839   |                |          |
| H  | 4.42952  | 0.09709  | 2.01872  | Sum of electronic and thermal Energies=      | -3138.906326   |                |          |
| H  | 1.60013  | 3.29925  | 1.45879  | Sum of electronic and thermal Enthalpies=    | -3138.905382   |                |          |
| H  | -3.93338 | 4.99533  | 0.96234  | Sum of electronic and thermal Free Energies= | -3139.045817   |                |          |
| H  | -0.41768 | 4.98775  | -1.52428 | SCF Done: E(RM06) =                          | -3139.99016956 |                |          |
| H  | -2.45168 | 6.15003  | -0.66823 |                                              |                |                |          |
| H  | 0.13119  | 2.72226  | -0.73623 | Int5d''                                      |                |                |          |
| H  | -3.39391 | 2.71752  | 1.73502  | Number of imaginary frequencies=             | 0              |                |          |
| H  | -5.47621 | -0.5426  | -0.68145 | Charge =                                     | 0              | Multiplicity = | 1        |
| H  | -4.75879 | -1.72292 | 3.3933   | P                                            | -1.18035       | 0.69582        | 1.10382  |
| H  | -6.23007 | -1.70496 | 1.38731  | P                                            | 2.84116        | 1.04173        | 0.1976   |
| H  | 0.6955   | -0.68756 | 2.79464  | C                                            | -0.97933       | 1.04462        | 2.91809  |
| H  | -1.74741 | 2.80712  | 3.40848  | C                                            | 0.1145         | 0.47575        | 3.58676  |
| H  | 1.32677  | -0.66098 | 5.18186  | C                                            | -1.87646       | 1.83883        | 3.65169  |
| H  | -1.10598 | 2.83642  | 5.7857   | C                                            | 0.30141        | 0.67858        | 4.95637  |
| H  | 0.4241   | 1.09787  | 6.69376  | C                                            | -1.68799       | 2.04632        | 5.01807  |
| Pd | 0.43734  | -0.23251 | -0.54303 | C                                            | -0.6005        | 1.46322        | 5.67478  |
| C  | 1.08042  | -0.85032 | -2.38308 | C                                            | -2.73447       | -0.31899       | 1.06616  |
| H  | 0.17215  | 0.82122  | -4.03346 | C                                            | -3.40266       | -0.48469       | -0.16192 |
| Cl | -0.07783 | 2.09822  | -4.80859 | C                                            | -3.20442       | -1.02214       | 2.18584  |
| N  | 0.17379  | -0.43646 | -3.4831  | C                                            | -4.51712       | -1.31768       | -0.25768 |
| H  | -0.79938 | -0.51866 | -3.19205 | C                                            | -4.3173        | -1.86286       | 2.08479  |
| H  | 0.3445   | -1.02978 | -4.30185 | C                                            | -4.97948       | -2.01163       | 0.86566  |
| O  | 2.06518  | -1.46289 | -2.72379 | C                                            | -1.7761        | 2.31309        | 0.4217   |
| C  | -0.77684 | -2.05636 | -0.54387 | C                                            | -3.0995        | 2.76439        | 0.56389  |
| H  | -1.56744 | -1.77276 | 0.14837  | C                                            | -0.85641       | 3.13257        | -0.24738 |
| C  | -1.45026 | -2.58763 | -1.80953 | C                                            | -3.48111       | 4.01269        | 0.07076  |
| H  | -0.74955 | -2.86944 | -2.60101 | C                                            | -1.2373        | 4.38286        | -0.7383  |
| H  | -2.03507 | -3.48895 | -1.56994 | C                                            | -2.54965       | 4.82777        | -0.5768  |
| H  | -2.15858 | -1.85664 | -2.21944 | C                                            | 3.31332        | 1.92578        | 1.75679  |
| C  | 0.1365   | -3.02476 | 0.13604  | C                                            | 2.41789        | 2.87166        | 2.28699  |
| C  | 0.05786  | -3.19781 | 1.53457  | C                                            | 4.49372        | 1.65125        | 2.46309  |
| C  | 1.06587  | -3.82501 | -0.5608  | C                                            | 2.70628        | 3.53886        | 3.47606  |
| C  | 0.87054  | -4.11009 | 2.20694  | C                                            | 4.77437        | 2.31027        | 3.66349  |
| H  | -0.67599 | -2.62206 | 2.09356  | C                                            | 3.88612        | 3.25823        | 4.17088  |
| C  | 1.87111  | -4.7452  | 0.10919  | C                                            | 4.37422        | 0.07971        | -0.20314 |
| H  | 1.17428  | -3.71228 | -1.63381 | C                                            | 5.51588        | 0.66334        | -0.77681 |
| C  | 1.78473  | -4.89178 | 1.49686  | C                                            | 4.39301        | -1.29088       | 0.09872  |
| H  | 0.77653  | -4.22328 | 3.28446  | C                                            | 6.65276        | -0.1045        | -1.0315  |



|    |          |          |          |                                                           |          |          |          |
|----|----------|----------|----------|-----------------------------------------------------------|----------|----------|----------|
| C  | 5.53564  | -2.05522 | -0.14919 | C                                                         | -0.22823 | -2.10928 | 0.28323  |
| C  | 6.66692  | -1.46494 | -0.71402 | H                                                         | -1.20208 | -1.63027 | 0.42344  |
| C  | 2.86371  | 2.39569  | -1.06333 | C                                                         | -0.47954 | -3.49738 | -0.31233 |
| C  | 3.56453  | 3.60161  | -0.89794 | C                                                         | 0.58482  | -4.30063 | -0.75092 |
| C  | 2.1377   | 2.19157  | -2.24861 | C                                                         | -1.78525 | -3.99406 | -0.42489 |
| C  | 3.54717  | 4.57423  | -1.8999  | C                                                         | 0.34806  | -5.56879 | -1.28068 |
| C  | 2.1259   | 3.16264  | -3.25119 | H                                                         | 1.60173  | -3.92189 | -0.6838  |
| C  | 2.83123  | 4.35581  | -3.07926 | C                                                         | -2.02379 | -5.26544 | -0.95436 |
| H  | 4.09261  | 5.50369  | -1.75679 | H                                                         | -2.61943 | -3.38185 | -0.0887  |
| H  | 1.55113  | 2.98838  | -4.15644 | C                                                         | -0.95788 | -6.05671 | -1.38333 |
| H  | 2.81687  | 5.1155   | -3.85654 | H                                                         | 1.18409  | -6.17716 | -1.6162  |
| H  | -3.05268 | 0.04256  | -1.04564 | H                                                         | -3.04327 | -5.63478 | -1.03127 |
| H  | -2.70588 | -0.91323 | 3.1438   | H                                                         | -1.14133 | -7.04479 | -1.79686 |
| H  | 1.55673  | 1.28198  | -2.37779 | C                                                         | 0.47191  | -2.20608 | 1.64539  |
| H  | 4.11709  | 3.78657  | 0.01843  | H                                                         | 1.47336  | -2.63404 | 1.54296  |
| H  | 7.52714  | 0.36042  | -1.47988 | H                                                         | 0.5715   | -1.21509 | 2.09788  |
| H  | 5.5342   | -3.1159  | 0.08826  | H                                                         | -0.11143 | -2.84247 | 2.31868  |
| H  | 7.55286  | -2.06209 | -0.91438 | Thermal correction to Energy= 0.783022                    |          |          |          |
| H  | 3.50208  | -1.76257 | 0.49942  | Thermal correction to Enthalpy= 0.783966                  |          |          |          |
| H  | 5.51726  | 1.71873  | -1.03155 | Thermal correction to Gibbs Free Energy= 0.649454         |          |          |          |
| H  | 2.00281  | 4.26958  | 3.86602  | Sum of electronic and zero-point Energies= -2678.165481   |          |          |          |
| H  | 5.69428  | 2.08336  | 4.19652  | Sum of electronic and thermal Energies= -2678.118040      |          |          |          |
| H  | 4.10768  | 3.77292  | 5.10218  | Sum of electronic and thermal Enthalpies= -2678.117095    |          |          |          |
| H  | 5.2001   | 0.9247   | 2.07575  | Sum of electronic and thermal Free Energies= -2678.251607 |          |          |          |
| H  | 1.48791  | 3.08753  | 1.76853  | SCF Done: E(RM06) = -2679.18710933                        |          |          |          |
| H  | -4.50952 | 4.34515  | 0.18703  | TS6d''                                                    |          |          |          |
| H  | -0.50846 | 4.99615  | -1.2611  | Number of imaginary frequencies=1                         |          |          |          |
| H  | -2.85043 | 5.79759  | -0.96449 | Charge =0 Multiplicity = 1                                |          |          |          |
| H  | 0.15629  | 2.7802   | -0.40826 | P                                                         | -1.55311 | 0.91493  | 0.7019   |
| H  | -3.8419  | 2.13301  | 1.04267  | P                                                         | 2.67239  | 0.956    | -0.03548 |
| H  | -5.02705 | -1.42175 | -1.21212 | C                                                         | -3.01144 | 0.37526  | 1.72165  |
| H  | -4.66804 | -2.3955  | 2.96516  | C                                                         | -3.40523 | -0.97491 | 1.66967  |
| H  | -5.85034 | -2.65764 | 0.7903   | C                                                         | -3.68164 | 1.2314   | 2.60833  |
| H  | 0.82995  | -0.11342 | 3.01918  | C                                                         | -4.44031 | -1.45025 | 2.47594  |
| H  | -2.72162 | 2.30501  | 3.15577  | C                                                         | -4.71456 | 0.75196  | 3.41976  |
| H  | 1.15783  | 0.23273  | 5.45478  | C                                                         | -5.09797 | -0.5878  | 3.35748  |
| H  | -2.39033 | 2.66537  | 5.57049  | C                                                         | -2.14141 | 0.54273  | -1.01497 |
| H  | -0.45539 | 1.62695  | 6.7395   | C                                                         | -1.1771  | 0.27627  | -1.99873 |
| Pd | 0.75077  | -0.28285 | 0.18917  | C                                                         | -3.49885 | 0.52313  | -1.37864 |
| C  | 0.87906  | -0.8392  | -1.9458  | C                                                         | -1.55494 | 0.01278  | -3.31704 |
| N  | -0.02917 | -0.83868 | -3.0865  | C                                                         | -3.87657 | 0.2537   | -2.69512 |
| H  | -0.89043 | -1.34656 | -2.88537 | C                                                         | -2.90577 | 0.00045  | -3.66769 |
| H  | 0.444    | -1.29221 | -3.86886 |                                                           |          |          |          |
| O  | 2.11377  | -0.86763 | -2.20683 |                                                           |          |          |          |

|   |          |          |          |                                                           |          |          |          |
|---|----------|----------|----------|-----------------------------------------------------------|----------|----------|----------|
| C | -1.67099 | 2.76366  | 0.81682  | H                                                         | -0.32342 | 2.80302  | 2.49911  |
| C | -2.4424  | 3.55039  | -0.05263 | H                                                         | -3.0017  | 3.08326  | -0.85665 |
| C | -0.94864 | 3.40133  | 1.84024  | H                                                         | -0.79018 | -0.19183 | -4.06142 |
| C | -2.49336 | 4.93798  | 0.1016   | H                                                         | -4.93071 | 0.23934  | -2.96013 |
| C | -1.01212 | 4.78562  | 2.00302  | H                                                         | -3.203   | -0.2131  | -4.69118 |
| C | -1.78372 | 5.55806  | 1.13201  | H                                                         | -2.90457 | -1.66525 | 0.99675  |
| C | 4.32589  | 0.46338  | 0.63506  | H                                                         | -3.40408 | 2.27865  | 2.66764  |
| C | 4.45494  | 0.28116  | 2.02141  | H                                                         | -4.72091 | -2.4982  | 2.41593  |
| C | 5.45376  | 0.27953  | -0.18401 | H                                                         | -5.22134 | 1.4334   | 4.09848  |
| C | 5.69213  | -0.05969 | 2.57499  | H                                                         | -5.90079 | -0.95812 | 3.98939  |
| C | 6.68563  | -0.06483 | 0.37296  | Pd                                                        | 0.61361  | 0.24895  | 1.31571  |
| C | 6.80794  | -0.23158 | 1.75505  | C                                                         | 0.51684  | -1.12428 | 2.846    |
| C | 2.7132   | 0.187    | -1.72414 | C                                                         | 0.80116  | -2.70563 | 1.76861  |
| C | 2.64043  | 0.91962  | -2.91732 | H                                                         | 1.07557  | -2.28903 | 0.79553  |
| C | 2.739    | -1.21787 | -1.7991  | C                                                         | 2.0093   | -3.37154 | 2.41718  |
| C | 2.59779  | 0.2647   | -4.1528  | H                                                         | 1.77207  | -3.78253 | 3.40385  |
| C | 2.70528  | -1.86867 | -3.03084 | H                                                         | 2.37761  | -4.1969  | 1.79215  |
| C | 2.63088  | -1.12846 | -4.21482 | H                                                         | 2.81336  | -2.64029 | 2.54205  |
| C | 2.86808  | 2.76514  | -0.39023 | C                                                         | -0.43314 | -3.53648 | 1.63393  |
| C | 4.09258  | 3.4463   | -0.31473 | C                                                         | -1.09221 | -3.62986 | 0.39479  |
| C | 1.71372  | 3.49263  | -0.72628 | C                                                         | -0.96387 | -4.26468 | 2.71493  |
| C | 4.15977  | 4.81626  | -0.57891 | C                                                         | -2.23645 | -4.41492 | 0.23868  |
| C | 1.78437  | 4.8576   | -1.00504 | H                                                         | -0.69374 | -3.08466 | -0.45783 |
| C | 3.00928  | 5.5244   | -0.92924 | C                                                         | -2.10906 | -5.04615 | 2.56293  |
| H | 5.11615  | 5.32858  | -0.5112  | H                                                         | -0.48321 | -4.20177 | 3.68609  |
| H | 0.87816  | 5.39981  | -1.26048 | C                                                         | -2.75246 | -5.1265  | 1.32436  |
| H | 3.06479  | 6.59046  | -1.13395 | H                                                         | -2.72099 | -4.47418 | -0.73276 |
| H | -0.12613 | 0.26577  | -1.72534 | H                                                         | -2.49926 | -5.59786 | 3.41481  |
| H | -4.26347 | 0.70944  | -0.63056 | H                                                         | -3.6399  | -5.74282 | 1.20518  |
| H | 0.75185  | 2.98998  | -0.75888 | O                                                         | 1.55461  | -0.55699 | 3.26307  |
| H | 4.99674  | 2.91073  | -0.04613 | N                                                         | -0.59425 | -1.27015 | 3.67313  |
| H | 2.54617  | 0.85097  | -5.06692 | H                                                         | -0.70858 | -0.48677 | 4.31216  |
| H | 2.73312  | -2.95467 | -3.06658 | H                                                         | -1.46012 | -1.48168 | 3.19066  |
| H | 2.60119  | -1.63559 | -5.17551 | Thermal correction to Energy= 0.781369                    |          |          |          |
| H | 2.79504  | -1.80625 | -0.88609 | Thermal correction to Enthalpy= 0.782313                  |          |          |          |
| H | 2.61906  | 2.00427  | -2.88849 | Thermal correction to Gibbs Free Energy= 0.645678         |          |          |          |
| H | 5.77608  | -0.2024  | 3.64908  | Sum of electronic and zero-point Energies= -2678.150814   |          |          |          |
| H | 7.54915  | -0.20412 | -0.27261 | Sum of electronic and thermal Energies= -2678.103295      |          |          |          |
| H | 7.76759  | -0.50337 | 2.18731  | Sum of electronic and thermal Enthalpies= -2678.102351    |          |          |          |
| H | 5.36894  | 0.40071  | -1.26014 | Sum of electronic and thermal Free Energies= -2678.238986 |          |          |          |
| H | 3.58305  | 0.37081  | 2.66055  | SCF Done: E(RM06) = -2679.16073244                        |          |          |          |
| H | -3.09286 | 5.53308  | -0.58264 |                                                           |          |          |          |
| H | -0.44725 | 5.26123  | 2.80026  |                                                           |          |          |          |
| H | -1.82618 | 6.63748  | 1.25237  |                                                           |          |          |          |

Reference:

- (1) M. J. Frisch, G. W. Trucks, H. B. Schlegel, G. E. Scuseria, M. A. Robb, J. R. Cheeseman, Scalmani, G.; Barone, V.; Mennucci, B.; Petersson, G. A.; Nakatsuji, H.; Caricato, M.; Li, X.; Hratchian, H. P.; Izmaylov, A. F.; Bloino, J.; Zheng, G.; Sonnenberg, J. L.; Hada, M.; Ehara, M.; Toyota, K.; Fukuda, R.; Hasegawa, J.; Ishida, M.; Nakajima, T.; Honda, Y.; Kitao, O.; Nakai, H.; Vreven, T.; Montgomery, J. A.; Peralta, Jr., J. E.; Ogliaro, F.; Bearpark, M.; Heyd, J. J.; Brothers, E.; Kudin, K. N.; Staroverov, V. N.; Kobayashi, R.; Normand, J.; Raghavachari, K.; Rendell, A.; Burant, J. C.; Iyengar, S. S.; Tomasi, J.; Cossi, M.; Rega, N.; Millam, J. M.; Klene, M.; Knox, J. E.; Cross, J. B.; Bakken, V.; Adamo, C.; Jaramillo, J.; Gomperts, R.; Stratmann, R. E.; Yazyev, O.; Austin, A. J.; Cammi, R.; Pomelli, C.; Ochterski, J. W.; Martin, R. L.; Morokuma, K.; Zakrzewski, V. G.; Voth, G. A.; Salvador, P.; Dannenberg, J. J.; Dapprich, S.; Daniels, A. D.; Farkas, Ö.; Foresman, J. B.; Ortiz, J. V.; Cioslowski, J.; Fox, D. J. *Gaussian 09*, Gaussian, Inc., Wallingford CT, 2009.
- (2) (a) C. Lee, W. Yang, R. G. Parr, *Phys. Rev. B* 1988, **37**, 785; (b) Becke, A. D. *J. Chem. Phys.*, 1993, **98**, 5648.
- (3) M. Dolg, U. Wedig, H. Stoll, H. Preuss, *J. Chem. Phys.*, 1987, **86**, 866.
- (4) (a) P. C. Hariharan, J. A. Pople, *Theor. Chem. Acc.*, 1973, **28**, 213. (b) Frisch, M. J.; Pople, J. A.; Binkley, J. S. *J. Chem. Phys.*, 1984, **80**, 3265.
- (5) A. V. Marenich, C. J. Cramer, D. G. Truhlar, *J. Phys. Chem. B.*, 2009, **113**, 6378.
- (6) Y. Zhao and D. G. Truhlar, *Theor. Chem. Acc.*, 2008, **120**, 215
- (7) P. Fuentealba, H. Preuss, H. Stoll, L.V. Szentpaly, *Chem. Phys. Lett.* 89 (1982) 418-422
- (8) (a) P. C. Hariharan and J. A. Pople, *Theor. Chem. Acc.*, 1973, **28**, 213; (b) M. J. Frisch, J. A. Pople and J. S. Binkley, *J. Chem. Phys.*, 1984, **80**, 3265.
